# Supplementary material for: Stimulatory and inhibitory G-protein signaling relays drive cAMP accumulation for timely metamorphosis in the chordate Ciona
Source: eLife. 2025 Jun 18;13:RP99825. doi: 10.7554/eLife.99825 (PMC12176390; doi:10.7554/eLife.99825)
Supplement: Supplementary file 1. [file elife-99825-supp1.xlsx]

## Sheet: Sheet1
Supplementary file 1. Expression levels of genes related to G-protein signaling during metamorphosis, as revealed by RNA-seq of the larval anterior tip including papillae
Signaling pathway	Protein name	Gene model	RPKM in sample 1	RPKM in sample 2
Gq	Gaq	KY21.Chr3.314	41.5988	36.0286
	Gaq_Chr11	KY21.Chr11.680	1.54466	1.29416
	IP3R	KY21.Chr8.925	8.8708	6.55408
	PLCb1/2/3	KY21.Chr4.150	8.33494	7.34049
	PLCb4	KY21.Chr13.136	1.82254	1.71316
Gs	Gas	KY21.Chr13.220	6.05102	7.10966
	AC5/6	KY21.Chr14.273	4.3236	4.91625
	AC9	KY21.Chr14.609	13.0547	10.4735
	sAC	KY21.Chr10.472	0.066171	0.0355217
	PDE1	KY21.Chr9.233	8.3134	7.51787
	PDE10	KY21.Chr2.501	0.0152295	0.030885
	PDE11/5/6	KY21.Chr12.88	0.038744	0.0594775
	PDE3	KY21.Chr14.824	4.68878	4.55409
	PDE4	KY21.Chr5.74	0.987515	0.846483
	PDE5/6	KY21.Chr1.1459	19.6059	17.6257
	PDE4/8	KY21.Chr5.637	3.10122	2.85954
	PDE9	KY21.Chr3.1286	0.116675	0.307599
	PDE9	KY21.Chr9.1095	5.40298	3.11921
Gi	Gai	KY21.Chr1.1027	39.7761	40.0117
	dvGai_Chr2	KY21.Chr2.875	125.372	134.296
	dvGai_Chr4	KY21.Chr4.943	174.91	156.462
	dvGai_Chr9	KY21.Chr9.455	2.5281	1.69372
G12/13	Ga12/13	KY21.Chr3.84	9.49087	9.24413
orphan G protein	orphan Ga	KY21.Chr8.580	1.74535	2.16305
GABA	GAD	KY21.Chr7.1221	3.51493	2.98786
	VIAAT/VGAT	KY21.Chr2.793	0.0526926	0.0356198
	GABABR1	KY21.Chr9.470	0.471066	0.716483
	GABABR2	KY21.Chr6.66	0.117408	0.136472
	GABABR2	KY21.Chr10.1059	1.81675	0.751408
	GIRK channel	KY21.Chr11.476	1.72555	1.67099
	GIRK channel	KY21.Chr13.97	3.39295	2.96035
Negative control1	VACHT	KY21.Chr1.783	0.00511705	0.0259431
1 The gene suggested not to be expressed in the papillae by in situ hybridization and immunostaining
