# Supplementary material for: Stimulatory and inhibitory G-protein signaling relays drive cAMP accumulation for timely metamorphosis in the chordate Ciona
Source: eLife. 2025 Jun 18;13:RP99825. doi: 10.7554/eLife.99825 (PMC12176390; doi:10.7554/eLife.99825)
Supplement: Supplementary file 2. [file elife-99825-supp2.xlsx]

## Sheet: RPKM絞り
Table 2. List of candidate genes that are upregulated by GABA
KY21 model	KH model	Tacut GABA updown	Pa vs Trunk1	Pa vs Trunk 2	Human homolog	cont - TSM_006_09 (GE) - RPKMLarge	GABA - TSM_006_10 (GE) - RPKMLarge	cont - TSM_006_12 (GE) - RPKMLarge	GABA - TSM_006_13 (GE) - RPKMLarge	cont - TSM_006_09 (GE) - RPKM	GABA - TSM_006_10 (GE) - RPKM	cont - TSM_006_12 (GE) - RPKM	GABA - TSM_006_13 (GE) - RPKM	Pap - TSM_006_01 (GE) - RPKM	Cut - TSM_006_02 (GE) - RPKM	Pap - TSM_006_05 (GE) - RPKM	Cut - TSM_006_02 (GE) - RPKM
KY21.Chr1.1	KH.L28.8		1.5738	1.2045	FGF13: fibroblast growth factor 13	30.41	28.6021	24.6452	30.463	30.41	28.6021	24.6452	30.463	39.1113	24.8509	41.9775	24.8509
KY21.Chr1.10	KH.L60.14		0.4455	0.4613	TAF9: TATA-box binding protein associated factor 9	49.7408	56.0466	47.6726	52.9185	49.7408	56.0466	47.6726	52.9185	22.5189	50.5455	27.5909	50.5455
KY21.Chr1.100	KH.L140.8		0.603	0.5581		1	1	1	1	0.167296	0.166485	0.409245	0.469932	0.216639	0.359217	0.257873	0.359217
KY21.Chr1.1000	KH.C1.544		0.4615	0.4331	PSMB7: proteasome subunit beta 7	122.982	126.482	100.644	131.116	122.982	126.482	100.644	131.116	49.5346	107.314	45.9677	107.314
KY21.Chr1.1001	KH.C1.325		0.6968	0.5521	LRRC47: leucine rich repeat containing 47	22.0406	19.6523	17.8946	21.7572	22.0406	19.6523	17.8946	21.7572	15.6024	22.39	15.7361	22.39
KY21.Chr1.1002	KH.C1.1086		0.6191	0.9109	TDRD1: tudor domain containing 1	1.56076	1.01928	1.12153	1	1.56076	1.01928	1.12153	0.771396	0.768896	1.24176	0.584738	1.24176
KY21.Chr1.1003	KH.C1.592		0.6424	0.0694		1	1	1	1	0.227009	0.494174	0.222127	0.339626	0.313136	0.487432	0.0453594	0.487432
KY21.Chr1.1004	KH.C1.289		0.5346	0.4581	DNAJC2: DnaJ heat shock protein family (Hsp40) member C2	23.4902	24.9216	21.3355	28.0709	23.4902	24.9216	21.3355	28.0709	19.2377	35.9821	21.7328	35.9821
KY21.Chr1.1005	KH.C1.814		0.9357	1.174		1	1.29355	1.28258	1.55637	0.94667	1.29355	1.28258	1.55637	1.44646	1.54573	1.68786	1.54573
KY21.Chr1.1006	KH.C1.1187		1.273	1.6783	NUAK1: NUAK family kinase 1	11.106	10.519	9.77753	10.0395	11.106	10.519	9.77753	10.0395	12.4439	9.77505	14.1696	9.77505
KY21.Chr1.1007	KH.C1.1187		1.2848	0.9716		1	1	1	1	0.325549	0.141737	0	0.139157	0.192454	0.149789	0.0650488	0.149789
KY21.Chr1.1008	KH.C1.938		0.4271	0.6452	RECQL: RecQ like helicase	2.57491	2.11214	1.72837	2.06306	2.57491	2.11214	1.72837	2.06306	1.27464	2.9838	1.69015	2.9838
KY21.Chr1.1009	KH.C1.634		0.7554	0.8042	SUMF1: sulfatase modifying factor 1	4.34543	4.36381	3.2588	3.79629	4.34543	4.36381	3.2588	3.79629	3.17517	4.20308	5.60257	4.20308
KY21.Chr1.101	KH.C1.150		0.5561	0.4653	NAA10: N(alpha)-acetyltransferase 10, NatA catalytic subunit	20.8216	19.4349	9.7618	20.6435	20.8216	19.4349	9.7618	20.6435	12.6338	22.7169	11.6851	22.7169
KY21.Chr1.1010	KH.C1.1134		0.4423	0.3405	GAS2: growth arrest specific 2	2.61598	2.14389	1.93861	2.23642	2.61598	2.14389	1.93861	2.23642	0.955185	2.15948	1.04541	2.15948
KY21.Chr1.1011	KH.C1.726		0.6019	0.6539	SLC9A6: solute carrier family 9 member A6	5.36717	5.31127	5.06375	5.51228	5.36717	5.31127	5.06375	5.51228	4.64698	7.71971	4.74077	7.71971
KY21.Chr1.1012	KH.C1.247		1.2959	0.9757	SPEN: spen family transcriptional repressor	1.47951	1.08746	8.7412	1.46203	1.47951	1.08746	8.7412	1.46203	5.17027	3.98954	3.22828	3.98954
KY21.Chr1.1013	KH.C1.478		1.3546	1.0635	SPEN: spen family transcriptional repressor	2.01382	1.63437	11.8422	3.84442	2.01382	1.63437	11.8422	3.84442	8.36825	6.17722	6.32881	6.17722
KY21.Chr1.1014	KH.C1.1292		1.1044	0.8554	XPO7: exportin 7	1.63991	1.26206	1.62461	1.7161	1.63991	1.26206	1.62461	1.7161	1.60907	1.4569	1.56087	1.4569
KY21.Chr1.1015	KH.C1.703		0.887	0.893	RFK: riboflavin kinase	8.00666	10.2933	5.94975	8.58848	8.00666	10.2933	5.94975	8.58848	4.91191	5.53752	7.54638	5.53752
KY21.Chr1.1016	KH.C1.6		0.5562	0.6851	CPOX: coproporphyrinogen oxidase	32.4648	37.7534	29.1366	37.9128	32.4648	37.7534	29.1366	37.9128	18.8995	33.9753	21.7642	33.9753
KY21.Chr1.1017	KH.S1826.2		0.8262	1.3684	NADK: NAD kinase	11.5809	13.0779	8.85301	12.1695	11.5809	13.0779	8.85301	12.1695	11.2203	13.5803	16.2946	13.5803
KY21.Chr1.1018	KH.S1826.1		0.6596	0.4741		5.55135	4.76481	5.69061	5.37867	5.55135	4.76481	5.69061	5.37867	3.58392	5.43283	3.4439	5.43283
KY21.Chr1.1019	KH.C1.708		0.6171	0.5207	PPM1G: protein phosphatase, Mg2+/Mn2+ dependent 1G	9.47125	8.12188	9.74851	10.6389	9.47125	8.12188	9.74851	10.6389	7.84349	12.7094	6.29548	12.7094
KY21.Chr1.102	KH.C1.914		0.8074	0.6912	DNAJB9: DnaJ heat shock protein family (Hsp40) member B9	3.94327	4.08148	4.68354	5.51255	3.94327	4.08148	4.68354	5.51255	5.35626	6.63358	5.56993	6.63358
KY21.Chr1.1020	KH.C1.192		0.4191	0.3746	MGME1: mitochondrial genome maintenance exonuclease 1	5.06468	6.13053	2.88632	4.18709	5.06468	6.13053	2.88632	4.18709	2.34701	5.59959	2.73571	5.59959
KY21.Chr1.1021	KH.C1.668		0.5139	0.3932		10.1242	10.454	10.5201	11.4127	10.1242	10.454	10.5201	11.4127	0.423726	0.824473	1.21735	0.824473
KY21.Chr1.1022	KH.C1.109		0.554	0.6167	CCDC15: coiled-coil domain containing 15	9.0762	7.85303	6.10215	6.90627	9.0762	7.85303	6.10215	6.90627	4.93073	8.89952	5.59782	8.89952
KY21.Chr1.1023	KH.C1.672		#NUM!	#NUM!	COL12A1: collagen type XII alpha 1 chain	1	1	1	1	0	0	0.0326142	0.028495	0.131362	0	0.0799197	0
KY21.Chr1.1024	KH.C1.1054		0.7236	0.5672	CEP85: centrosomal protein 85	9.63553	7.87896	9.31001	8.35558	9.63553	7.87896	9.31001	8.35558	7.63581	10.5512	4.85811	10.5512
KY21.Chr1.1025	KH.C1.1193		0.7232	0.7104		8.15521	7.4028	3.9745	7.88719	8.15521	7.4028	3.9745	7.88719	20.997	29.0333	16.0813	29.0333
KY21.Chr1.1026	KH.C1.393		1.0183	1.3056		1	1	1	1	0	0.0119168	0	0	3.46274	3.40033	0.940688	3.40033
KY21.Chr1.1027	KH.C1.612		0.929	0.9498	GNAI1: G protein subunit alpha i1	50.6513	44.1691	43.4137	47.8684	50.6513	44.1691	43.4137	47.8684	39.7761	42.8136	40.0117	42.8136
KY21.Chr1.1028	KH.C1.929		#NUM!	0		1	1	1	1	0	0.100454	0.112883	0	0	0	0	0
KY21.Chr1.1029	KH.C1.1213		0.97	1.4972	UVRAG: UV radiation resistance associated	2.25392	2.00437	2.83892	3.55655	2.25392	2.00437	2.83892	3.55655	2.50425	2.5816	4.14908	2.5816
KY21.Chr1.103	SPKH.S1370.10001		0.6424	#NUM!		2.14825	1.8706	1	1	2.14825	1.8706	0	0.183656	0.169331	0.263583	0	0.263583
KY21.Chr1.1030	KH.C1.1209		#NUM!	#NUM!		1	1	1	1	0	0	0.255187	0.557391	0	0	0	0
KY21.Chr1.1031	KH.C1.854		0.8798	0.8211	EPC1: enhancer of polycomb homolog 1	4.97591	3.4307	4.68457	4.67665	4.97591	3.4307	4.68457	4.67665	5.45635	6.20156	4.4161	6.20156
KY21.Chr1.1032	KH.C1.587		#NUM!	#NUM!		1	1	1	1	0	0	0	0	0	0	0	0
KY21.Chr1.1033	KH.C1.1196		2.0065	1.637		17.3363	15.1487	12.1338	17.5819	17.3363	15.1487	12.1338	17.5819	15.4901	7.71962	21.8677	7.71962
KY21.Chr1.1034	SPKH.C1.10423		0	0		1	1	1	1	0.0397077	0	0.0777073	0.0678928	0	0.02436	0	0.02436
KY21.Chr1.1035	KH.C1.334		0.3757	0.5683	DDX58: DExD/H-box helicase 58	1	1	1	1	0.450044	0.371609	0.417587	0.517417	0.189601	0.504586	0.384505	0.504586
KY21.Chr1.1036	0		#NUM!	#NUM!		1	1	1	1	0	0	0	0	0	0	0	0
KY21.Chr1.1037	KH.C1.340		1.0959	1.0106	MMP16: matrix metallopeptidase 16	3.57415	4.2333	4.28465	4.3569	3.57415	4.2333	4.28465	4.3569	5.42833	4.95306	4.9951	4.95306
KY21.Chr1.1038	KH.C1.602		0.6454	0.5793		64.1878	63.4102	53.0652	80.0231	64.1878	63.4102	53.0652	80.0231	33.2109	51.4502	48.935	51.4502
KY21.Chr1.1039	SPKH.C1.10221		0	0.5829		1	1	1	1	0.0768474	0.0669153	0.451167	0.328487	0	0.0471445	0.184261	0.0471445
KY21.Chr1.104	KH.C1.443		1.3907	1.9499	B4GALT1: beta-1,4-galactosyltransferase 1	2.5256	2.2731	1.72366	2.7942	2.5256	2.2731	1.72366	2.7942	4.83466	3.47641	4.97014	3.47641
KY21.Chr1.1040	KH.C1.417		0.6658	0.9386	APIP: APAF1 interacting protein	26.4732	27.1321	24.0578	29.864	26.4732	27.1321	24.0578	29.864	15.6861	23.5586	30.4492	23.5586
KY21.Chr1.1041	KH.C1.967		1.0229	1.568	GPR155: G protein-coupled receptor 155	1.81127	1.73489	1.71837	1.5754	1.81127	1.73489	1.71837	1.5754	2.83676	2.77312	2.94567	2.77312
KY21.Chr1.1042	KH.C1.358		1.1661	0.9285	SH3GLB1: SH3 domain containing GRB2 like, endophilin B1	6.78281	5.78541	5.55133	6.15435	6.78281	5.78541	5.55133	6.15435	6.15133	5.27489	5.42117	5.27489
KY21.Chr1.1043	KH.C1.766		5.1393	1.1659		1	1	1	1	0.220728	0	0.143987	0.0629007	0.231978	0.0451376	0.352834	0.0451376
KY21.Chr1.1044	KH.C1.224		0.3023	0.0607	TBX20: T-box 20	1	1	1	1	0.0833313	0.0997717	0.101924	0.151386	0.032842	0.108635	0.00832533	0.108635
KY21.Chr1.1045	KH.C1.1084		1.3704	0.3238	TXN: thioredoxin	3.3296	4.63884	3.09509	4.12743	3.3296	4.63884	3.09509	4.12743	2.09959	1.53199	0.399179	1.53199
KY21.Chr1.1046	KH.C1.75		0.8056	0.7399		1	1	1.54616	1	0.286767	0.361816	1.54616	0.290188	0.535108	0.664211	0.463075	0.664211
KY21.Chr1.1047	KH.C1.692		1.5418	0.4858		1	1	1	1	0.212425	0.18497	0.25982	0.0454009	0.251158	0.162899	0.0848905	0.162899
KY21.Chr1.1048	KH.C1.552		1.0679	1.0632	CCDC92: coiled-coil domain containing 92	3.05824	2.88489	3.62722	3.36717	3.05824	2.88489	3.62722	3.36717	3.5063	3.2833	3.87014	3.2833
KY21.Chr1.1049	KH.C1.887		0.2965	0.9716	CNTD1: cyclin N-terminal domain containing 1	1	1	1	1	0.506795	0.189126	0.35421	0.680841	0.171201	0.577403	0.405056	0.577403
KY21.Chr1.105	KH.L115.4		1.9272	0	RTL1: retrotransposon Gag like 1	1	1	1	1	0.025571	0	0.0375315	0.131165	0.42327	0.219623	0	0.219623
KY21.Chr1.1050	KH.C1.902		0.5694	0.452	GSTM3: glutathione S-transferase mu 3	283.462	294.059	198.013	243.803	283.462	294.059	198.013	243.803	134.449	236.104	105.252	236.104
KY21.Chr1.1051	KH.C1.710		1.0129	1.1222	FAM49B: family with sequence similarity 49 member B	9.61364	8.80843	8.22348	9.24392	9.61364	8.80843	8.22348	9.24392	11.407	11.2611	13.0656	11.2611
KY21.Chr1.1052	KH.C1.117		0.4416	1.085	FBXO25: F-box protein 25	1.27082	1	1.01321	1.09984	1.27082	0.887989	1.01321	1.09984	0.408096	0.923998	0.840148	0.923998
KY21.Chr1.1053	KH.C1.408		1.2848	1.2753		1	1	1	1	0.664757	0.810377	0.650459	0.568305	1.25755	0.978759	2.23149	0.978759
KY21.Chr1.1054	KH.C1.39		0.7851	0.0607		1	1	1.11229	1	0.284186	0.866098	1.11229	0.485905	1.23202	1.56909	0.113568	1.56909
KY21.Chr1.1055	KH.C1.202		0.6482	0.585	PRIM2: primase (DNA) subunit 2	4.11311	3.55488	2.73795	3.60783	4.11311	3.55488	2.73795	3.60783	3.37463	5.2061	2.81079	5.2061
KY21.Chr1.1056	KH.C1.1278		0.3586	0.3837	NSMCE1: NSE1 homolog, SMC5-SMC6 complex component	16.1934	15.6886	15.0339	18.994	16.1934	15.6886	15.0339	18.994	7.40577	20.6485	10.2922	20.6485
KY21.Chr1.1057	KH.C1.699		0.9695	1.0199		1.33311	1.01666	1.23623	1.30356	1.33311	1.01666	1.23623	1.30356	1.41479	1.45928	1.17691	1.45928
KY21.Chr1.1058	KH.C1.488		0.6477	0.6729	ZNF143: zinc finger protein 143	3.24142	2.76659	2.4599	2.86257	3.24142	2.76659	2.4599	2.86257	2.05747	3.17643	1.75279	3.17643
KY21.Chr1.1059	KH.C1.956		0.4015	0.5056	COPS7A: COP9 signalosome subunit 7A	5.82647	4.46683	4.15193	5.84737	5.82647	4.46683	4.15193	5.84737	1.87198	4.66231	2.91051	4.66231
KY21.Chr1.106	KH.L115.4		1.346	1.5268	RTL1: retrotransposon Gag like 1	1	1	1	1	0.0469723	0.0102254	0.0804335	0.0301177	0.203636	0.151288	0.103242	0.151288
KY21.Chr1.1060	KH.C1.1145		1.4474	1.3811	SCYL3: SCY1 like pseudokinase 3	4.09091	3.58181	4.36683	4.41264	4.09091	3.58181	4.36683	4.41264	7.35521	5.08163	5.86379	5.08163
KY21.Chr1.1061	KH.C1.363		0.4401	0.4072	DDX39B: DExD-box helicase 39B	227.531	237.943	196.306	242.068	227.531	237.943	196.306	242.068	141.401	321.261	110.945	321.261
KY21.Chr1.1062	KH.C1.883		0.7168	1.055	KIFAP3: kinesin associated protein 3	2.91752	2.73719	1.89357	2.32625	2.91752	2.73719	1.89357	2.32625	2.19901	3.06745	1.98638	3.06745
KY21.Chr1.1063	KH.C1.1016		0.3861	0.4113	NR6A1: nuclear receptor subfamily 6 group A member 1	18.6648	17.8784	25.4957	19.9791	18.6648	17.8784	25.4957	19.9791	15.5868	40.3682	12.2799	40.3682
KY21.Chr1.1064	KH.C1.856		2.1413	0		1	1	1	1	0.792168	0.492704	0	0.483736	0.446006	0.208278	0	0.208278
KY21.Chr1.1065	KH.C1.662		0.3286	0.383	SEM1: SEM1, 26S proteasome complex subunit	334.135	396.975	231.842	313.352	334.135	396.975	231.842	313.352	85.4527	260.027	126.201	260.027
KY21.Chr1.1066	KH.C1.288		1.0595	0.8341	COG7: component of oligomeric golgi complex 7	6.99764	6.73068	6.55217	6.07437	6.99764	6.73068	6.55217	6.07437	8.06144	7.60838	6.16076	7.60838
KY21.Chr1.1067	KH.C1.225		0.4927	0.4223	SLC6A1: solute carrier family 6 member 1	7.67121	7.14851	5.487	6.44312	7.67121	7.14851	5.487	6.44312	5.76376	11.6966	5.48583	11.6966
KY21.Chr1.1068	KH.C1.1272		0.6352	0.7569	THAP9: THAP domain containing 9	8.66751	7.54728	9.01248	8.02277	8.66751	7.54728	9.01248	8.02277	6.79771	10.7014	7.34421	10.7014
KY21.Chr1.1069	KH.L35.2		0.6424	#NUM!		1	1	1	1	0	0	0	0	0.101255	0.157615	0	0.157615
KY21.Chr1.107	KH.C1.1238		0.9089	1.0778	WDR33: WD repeat domain 33	2.50563	2.18179	2.90338	1.86963	2.50563	2.18179	2.90338	1.86963	3.95867	4.35529	3.47825	4.35529
KY21.Chr1.1070	SPKH.S2536.10002		#NUM!	#NUM!		1	1	1	1	0	0	0	0	0	0	0	0
KY21.Chr1.1071	KH.S1927.1		0.5281	0.4009	RPL8: ribosomal protein L8	24.1722	25.2133	29.3288	29.0615	24.1722	25.2133	29.3288	29.0615	11.5923	21.9472	20.3771	21.9472
KY21.Chr1.1072	KH.L123.1		0.5067	0.4771	RPL8: ribosomal protein L8	355.878	391.282	281.147	375.601	355.878	391.282	281.147	375.601	140.407	277.066	160.434	277.066
KY21.Chr1.1073	KH.L123.3		1.6002	1.5075	ZSWIM8: zinc finger SWIM-type containing 8	6.13817	5.71481	5.70097	5.37122	6.13817	5.71481	5.70097	5.37122	10.6456	6.65229	10.2237	6.65229
KY21.Chr1.1074	KH.L123.4		0.7441	0.526	SKI: SKI proto-oncogene	4.71336	4.55156	5.02728	4.74563	4.71336	4.55156	5.02728	4.74563	3.57433	4.80328	3.67789	4.80328
KY21.Chr1.1075	KH.L123.7		4.0881	#NUM!	KLK8: kallikrein related peptidase 8	1	1	1	1	0	0	0.0756019	0.0440356	0.710516	0.1738	1.15273	0.1738
KY21.Chr1.1076	KH.L123.2		#NUM!	#NUM!		1	1	1	1	0	0	0	0	0	0	0	0
KY21.Chr1.1077	KH.L123.6		0.6535	0.5328	TTC21B: tetratricopeptide repeat domain 21B	1	1	1	1	0.609704	0.560634	0.510681	0.437842	0.338332	0.517675	0.265095	0.517675
KY21.Chr1.1078	KH.L123.8		0.2982	0.4754	GRB2: growth factor receptor bound protein 2	1	1	1	1	0.703843	0.468669	0.445632	0.353953	0.212125	0.711192	0.380547	0.711192
KY21.Chr1.1079	KH.S1557.1		0.5621	0.2242	GRB2: growth factor receptor bound protein 2	1	1.06506	1.50372	2.14497	0.784066	1.06506	1.50372	2.14497	0.173046	0.307847	0.1504	0.307847
KY21.Chr1.108	KH.C1.841		0.4496	0.5113	CYB5D1: cytochrome b5 domain containing 1	2.24036	3.1513	1.28158	2.20996	2.24036	3.1513	1.28158	2.20996	0.7607	1.69159	1.37739	1.69159
KY21.Chr1.1080	KH.L84.33		0.4672	0	KYNU: kynureninase	1	1	1	1	0.0315657	0.0412291	0	0.0269858	0.0497619	0.106508	0	0.106508
KY21.Chr1.1081	KH.L84.22		#NUM!	#NUM!		1	1	1	1	0	0	0	0	0	0	0	0
KY21.Chr1.1082	KH.S1557.1		0.9177	0.2776	GRB2: growth factor receptor bound protein 2	1	1	1	1	0.13531	0.154074	0.22406	0.382624	0.082042	0.0893954	0.0332758	0.0893954
KY21.Chr1.1083	KH.L115.4		#NUM!	#NUM!	RTL1: retrotransposon Gag like 1	1	1	1	1	0	0	0	0	0.0274013	0	0	0
KY21.Chr1.1084	KH.L84.33		1.7987	0	KYNU: kynureninase	1	1	1	1	0.0148927	0.0259358	0.0437172	0.0509276	0.0821718	0.0456821	0	0.0456821
KY21.Chr1.1085	KH.L84.8		0.6944	0.5426	DEPDC5: DEP domain containing 5	1.53323	1.37745	1.06565	1.15993	1.53323	1.37745	1.06565	1.15993	0.896807	1.29147	0.627306	1.29147
KY21.Chr1.1086	KH.L84.10		0.6806	0.678	SLC5A3: solute carrier family 5 member 3	2.91198	2.53562	2.92726	2.90763	2.91198	2.53562	2.92726	2.90763	2.55531	3.75433	2.6456	3.75433
KY21.Chr1.1087	KH.L84.26		0.5759	0.6053		3.97692	3.54045	4.47218	4.08495	3.97692	3.54045	4.47218	4.08495	2.1288	3.69607	3.72413	3.69607
KY21.Chr1.1088	KH.L84.15		0.844	1.0442	SRPRB: SRP receptor beta subunit	18.5815	18.5823	13.2529	17.4758	18.5815	18.5823	13.2529	17.4758	16.2445	19.2469	19.462	19.2469
KY21.Chr1.1089	KH.L84.27		0.8619	0.8615	DCUN1D1: defective in cullin neddylation 1 domain containing 1	18.359	17.9903	13.0672	20.4542	18.359	17.9903	13.0672	20.4542	14.5344	16.8616	19.2509	16.8616
KY21.Chr1.109	KH.C1.709		0.5139	0.2957	ENKUR: enkurin, TRPC channel interacting protein	2.11426	1.20373	1.67094	1.73797	2.11426	1.20373	1.67094	1.73797	0.769159	1.49661	0.454952	1.49661
KY21.Chr1.1090	KH.L84.32		#NUM!	#NUM!		1	1	1	1	0.127086	0.442643	0	0	0	0	0	0
KY21.Chr1.1091	KH.L84.16		0.5464	0.9606	PTGS2: prostaglandin-endoperoxide synthase 2	5.08087	4.82488	5.17796	5.08128	5.08087	4.82488	5.17796	5.08128	3.40037	6.22228	5.33279	6.22228
KY21.Chr1.1092	KH.L84.20		0.0246	0.0958	SLC22A5: solute carrier family 22 member 5	1	1	1	1.06422	0.905335	0.858712	0.93332	1.06422	0.0892011	3.62006	0.284268	3.62006
KY21.Chr1.1093	KH.L84.2		1.0891	0.9002	ACAP2: ArfGAP with coiled-coil, ankyrin repeat and PH domains 2	1.75334	1.42495	1.65129	1.66757	1.75334	1.42495	1.65129	1.66757	1.69874	1.55968	1.47143	1.55968
KY21.Chr1.1094	KH.S1538.1		0.8329	0.5411	GIN1: gypsy retrotransposon integrase 1	4.47416	3.40665	6.43453	3.82499	4.47416	3.40665	6.43453	3.82499	5.01932	6.02582	2.19548	6.02582
KY21.Chr1.1095	KH.L84.31		1.1295	1.1533	AMBRA1: autophagy and beclin 1 regulator 1	8.96549	6.74323	7.70468	7.36474	8.96549	6.74323	7.70468	7.36474	8.49044	7.5169	8.70267	7.5169
KY21.Chr1.1096	KH.L84.6		1.4832	1.4598	COPB2: coatomer protein complex subunit beta 2	22.1259	16.9793	18.091	19.6425	22.1259	16.9793	18.091	19.6425	40.5325	27.3274	30.7321	27.3274
KY21.Chr1.1097	KH.L84.4		0.2626	0.2564	FAM72B: family with sequence similarity 72 member B	8.71231	8.38993	6.28533	8.93155	8.71231	8.38993	6.28533	8.93155	2.1533	8.19845	2.65551	8.19845
KY21.Chr1.1098	KH.L84.29		0.2336	0.0719	FBXO24: F-box protein 24	1	1	1	1	0.150008	0.0914344	0.205494	0.115419	0.0472962	0.20246	0.0239789	0.20246
KY21.Chr1.1099	KH.L84.14		0.3384	0.2581		1480.32	1763.54	1478.08	1742.98	1480.32	1763.54	1478.08	1742.98	54.8131	161.948	51.5867	161.948
KY21.Chr1.11	KH.L60.12		0.5708	0.5413	TFDP1: transcription factor Dp-1	8.27431	8.26099	11.7885	10.2765	8.27431	8.26099	11.7885	10.2765	7.11687	12.4671	7.56108	12.4671
KY21.Chr1.110	KH.C1.165		0.6111	0.5605	VAMP3: vesicle associated membrane protein 3	14.0115	14.2392	12.9844	14.4843	14.0115	14.2392	12.9844	14.4843	10.2554	16.7805	11.4701	16.7805
KY21.Chr1.1100	KH.L84.19		0	1.9433		1	1	1	1	0.604516	0.39479	0	0.646007	0	1.11258	0.24158	1.11258
KY21.Chr1.1101	KH.L84.3		0.1245	0.2233		10.9218	11.0953	7.42146	8.73195	10.9218	11.0953	7.42146	8.73195	1.27539	10.2366	3.23306	10.2366
KY21.Chr1.1102	KH.L84.5		0	0		4.57901	4.30617	3.4052	2.81853	4.57901	4.30617	3.4052	2.81853	0	7.07903	0	7.07903
KY21.Chr1.1103	KH.L84.25		0.3738	0.4187	RFWD2: ring finger and WD repeat domain 2	8.56234	7.58261	8.77035	8.31677	8.56234	7.58261	8.77035	8.31677	3.61865	9.67864	3.7275	9.67864
KY21.Chr1.1104	KH.L84.18		0.4873	0.3576	ERI1: exoribonuclease 1	4.14679	4.40179	3.67116	4.76059	4.14679	4.40179	3.67116	4.76059	2.39698	4.91836	1.8939	4.91836
KY21.Chr1.1105	KH.L84.1		1.8181	1.2446		1	1	1	1	0.713947	0.746009	0.536812	0.74528	0.444278	0.244354	0.931017	0.244354
KY21.Chr1.1106	KH.S1906.2		0.7341	#NUM!		1	1	1	1	0	0	0	0	0.226371	0.308326	0	0.308326
KY21.Chr1.1107	KH.S1906.1		0.7341	0.2159		1	1	1	1	0	0	0	0	0.344897	0.469763	0.174861	0.469763
KY21.Chr1.1108	KH.L84.30		0.3953	0.8833	TLX3: T-cell leukemia homeobox 3	1	1	1	1	0.475962	0.472009	0.737398	0.632961	0.0416851	0.105442	0.211341	0.105442
KY21.Chr1.1109	KH.L84.21		1.0379	0.8174	NPHP4: nephrocystin 4	1.01346	1	1	1	1.01346	0.813265	0.868517	0.934371	0.965916	0.93058	0.841777	0.93058
KY21.Chr1.111	KH.C1.1034		0.5152	0.4152	PAQR8: progestin and adipoQ receptor family member 8	3.22617	2.74041	5.14105	5.96646	3.22617	2.74041	5.14105	5.96646	2.48068	4.81471	2.66272	4.81471
KY21.Chr1.1110	KH.L84.24		0.2028	0.1396		8.78235	10.5838	9.83092	10.4513	8.78235	10.5838	9.83092	10.4513	2.65823	13.1032	2.52695	13.1032
KY21.Chr1.1111	KH.L84.28		1.0324	1.1104		3.74971	4.01517	4.56153	5.54491	3.74971	4.01517	4.56153	5.54491	3.59467	3.48166	4.85994	3.48166
KY21.Chr1.1112	KH.L84.23		1.0094	1.097	KLHL21: kelch like family member 21	9.9941	7.62727	8.37197	10.7297	9.9941	7.62727	8.37197	10.7297	8.26692	8.18979	8.02263	8.18979
KY21.Chr1.1113	KH.L84.17		1.7987	1.2955		1	1	1	1	0.940027	0.409267	0.459904	0.301363	0.648334	0.360431	0.751318	0.360431
KY21.Chr1.1114	KH.L84.11		1.143	1.4533		68.127	64.4272	72.8468	91.6839	68.127	64.4272	72.8468	91.6839	19.2076	16.804	34.535	16.804
KY21.Chr1.1115	KH.L84.13		0.8912	0.5452		1	1	1	1	0.421802	0.292899	0.31869	0.228229	0.324058	0.363585	0.332858	0.363585
KY21.Chr1.1116	KH.L84.12		0	0		1	1	1	1	0.0648875	0	0.0317459	0.110946	0	0.0199037	0	0.0199037
KY21.Chr1.1117	KH.S714.4		1.6228	1.915	BICD2: BICD cargo adaptor 2	8.92141	7.80372	6.96177	8.04347	8.92141	7.80372	6.96177	8.04347	10.0241	6.17672	13.7498	6.17672
KY21.Chr1.1118	KH.S714.6		#NUM!	#NUM!		1	1	1	1	0	0	0	0	0	0	0	0
KY21.Chr1.1119	KH.S714.2		0	#NUM!	MFGE8: milk fat globule-EGF factor 8 protein	2.23202	2.53355	1.09201	1	2.23202	2.53355	1.09201	0.545192	0	0.220067	0	0.220067
KY21.Chr1.112	KH.C1.881		0.1908	0.2315	PTPMT1: protein tyrosine phosphatase, mitochondrial 1	15.3418	17.4694	14.5499	14.9823	15.3418	17.4694	14.5499	14.9823	3.48831	18.2809	6.27246	18.2809
KY21.Chr1.1120	KH.S714.5		0.2855	0.1388	MFGE8: milk fat globule-EGF factor 8 protein	1	1	1	1	0.0923812	0.120662	0.112993	0.0197443	0.0364086	0.127517	0.0184589	0.127517
KY21.Chr1.1121	KH.S714.1		0.6531	0.482	MCM4: minichromosome maintenance complex component 4	20.8307	16.7851	14.5408	18.007	20.8307	16.7851	14.5408	18.007	14.3469	21.9672	10.9716	21.9672
KY21.Chr1.1122	KH.S714.3		0.5778	0.3562		29.4641	26.2515	25.3172	24.2634	29.4641	26.2515	25.3172	24.2634	31.7594	54.9613	23.5948	54.9613
KY21.Chr1.1123	SPKH.S714.10002		0.3179	0.4682	GNB1L: G protein subunit beta 1 like	8.85091	6.37192	7.84222	9.65202	8.85091	6.37192	7.84222	9.65202	2.69173	8.46548	2.22806	8.46548
KY21.Chr1.1124	KH.S1184.2		0.4848	0.4763	PUS7L: pseudouridylate synthase 7 like	4.97858	4.21609	3.65641	3.71081	4.97858	4.21609	3.65641	3.71081	2.15519	4.44512	1.60258	4.44512
KY21.Chr1.1125	KH.S1184.1		#NUM!	#NUM!		1	1	1	1	0	0	0	0	0	0	0	0
KY21.Chr1.1126	KH.L61.2		5.1113	6.3119	ADAMTS9: ADAM metallopeptidase with thrombospondin type 1 motif 9	1	1	1	1	0.213727	0.157271	0.84241	0.249627	3.89842	0.762697	1.9849	0.762697
KY21.Chr1.1127	KH.L61.6		5.5676	7.218		1	1	2.26747	1	0.856398	0.657983	2.26747	0.646007	12.9051	2.31787	8.37478	2.31787
KY21.Chr1.1128	KH.L61.1		0.7765	0.8245	PRKAR2A: protein kinase cAMP-dependent type II regulatory subunit alpha	21.1968	18.0225	15.204	16.194	21.1968	18.0225	15.204	16.194	17.7096	22.8055	17.8969	22.8055
KY21.Chr1.1129	0		#NUM!	#NUM!		1	1	1	1	0	0	0	0	0	0	0	0
KY21.Chr1.113	KH.C1.881		0.582	0.5299	CIB1: calcium and integrin binding 1	1	1.0402	1	1	0.821287	1.0402	0.569841	0.612763	0.623819	1.07182	0.501262	1.07182
KY21.Chr1.1130	KH.L61.14		1.5631	1.67	HSP90B1: heat shock protein 90 beta family member 1	50.6555	35.4607	38.493	37.2686	50.6555	35.4607	38.493	37.2686	62.0851	39.7179	53.0114	39.7179
KY21.Chr1.1131	KH.L61.15		1.2848	0	MORN5: MORN repeat containing 5	1	1	1	1	0.0751464	0.0654342	0.14706	0	0.0592324	0.046101	0	0.046101
KY21.Chr1.1132	KH.L61.4		0	#NUM!	MMP24: matrix metallopeptidase 24	1	1	1	1	0.0472584	0	0.0924838	0.0202008	0	0.0144961	0	0.0144961
KY21.Chr1.1133	KH.L61.10		0.336	0.1397		1	1	1	1	0.4487	0.390708	0.595852	0.684994	0.429465	1.27804	0.537936	1.27804
KY21.Chr1.1134	KH.L61.12		1.218	1.1461	TMBIM4: transmembrane BAX inhibitor motif containing 4	15.4136	14.8185	11.6059	15.2346	15.4136	14.8185	11.6059	15.2346	18.1338	14.887	17.7463	14.887
KY21.Chr1.1135	KH.L61.16		1.5018	1.4274	AGL: amylo-alpha-1, 6-glucosidase, 4-alpha-glucanotransferase	13.9486	10.705	16.3469	12.2594	13.9486	10.705	16.3469	12.2594	20.8674	13.8945	14.2057	13.8945
KY21.Chr1.1136	KH.L61.9		0.695	1.0158		1.7439	1.27555	1.05796	1.62505	1.7439	1.27555	1.05796	1.62505	0.90723	1.30522	1.60289	1.30522
KY21.Chr1.1137	KH.L61.8		0.5901	0.5398		3.71209	2.86577	1.53528	2.192	3.71209	2.86577	1.53528	2.192	2.8958	4.90677	3.51745	4.90677
KY21.Chr1.1138	KH.L61.11		0.8011	0.6446	TEKT2: tektin 2	1.46372	1.69939	1.06091	1.69163	1.46372	1.69939	1.06091	1.69163	2.26475	2.82692	1.49484	2.82692
KY21.Chr1.1139	KH.L61.5		0.4083	0.3902	GMNN: geminin, DNA replication inhibitor	10.9213	10.0435	8.17839	10.4324	10.9213	10.0435	8.17839	10.4324	6.58812	16.1348	6.63574	16.1348
KY21.Chr1.114	0		0	#NUM!		1	1	1	1	0	0	0	0	0	0.030807	0	0.030807
KY21.Chr1.1140	KH.L61.13		0.7086	0.5648	VPS28: VPS28, ESCRT-I subunit	26.4853	24.8323	21.8206	25.9136	26.4853	24.8323	21.8206	25.9136	17.3892	24.5375	19.3048	24.5375
KY21.Chr1.1141	KH.L61.3		0.6038	0.7528		1.38848	1	2.61782	1.5634	1.38848	0.933803	2.61782	1.5634	1.2546	2.07758	1.55184	2.07758
KY21.Chr1.1142	KH.L61.17		0.7675	0.9974	CTSC: cathepsin C	16.0018	15.2372	17.6371	18.9895	16.0018	15.2372	17.6371	18.9895	13.6974	17.8465	16.2496	17.8465
KY21.Chr1.1143	0		0.9093	1.0731	TTPAL: alpha tocopherol transfer protein like	17.6086	12.2775	15.0681	15.8314	17.6086	12.2775	15.0681	15.8314	11.1651	12.2774	15.372	12.2774
KY21.Chr1.1144	KH.C1.1130		1.0361	0.8902	C12orf4: chromosome 12 open reading frame 4	3.01068	2.74556	2.36868	1.913	3.01068	2.74556	2.36868	1.913	2.40517	2.32123	2.48758	2.32123
KY21.Chr1.1145	KH.C1.1015		#NUM!	#NUM!		1	1	1	1	0	0	0	0	0	0	0	0
KY21.Chr1.1146	KH.C1.807		0.9069	1.4532	UVSSA: UV stimulated scaffold protein A	4.24108	3.76755	4.31753	3.84547	4.24108	3.76755	4.31753	3.84547	4.05204	4.46778	5.88916	4.46778
KY21.Chr1.1147	KH.C1.386		0.8137	0.8161	CIB1: calcium and integrin binding 1	3.55914	2.79826	2.43443	4.84475	3.55914	2.79826	2.43443	4.84475	2.58751	3.17981	4.63982	3.17981
KY21.Chr1.1148	KH.C1.1057		1.005	0.9058	XPNPEP1: X-prolyl aminopeptidase 1	5.37249	5.5692	4.25562	4.78045	5.37249	5.5692	4.25562	4.78045	5.32943	5.30263	4.22094	5.30263
KY21.Chr1.1149	KH.C1.427		0.5561	1.0796	BDH1: 3-hydroxybutyrate dehydrogenase 1	2.01541	2.01492	1.93554	1.14866	2.01541	2.01492	1.93554	1.14866	0.853137	1.53407	1.1932	1.53407
KY21.Chr1.115	KH.C1.403		0	#NUM!	HIST1H2BN: histone cluster 1 H2B family member n	1	1	1	1	0.218529	0	0.213829	0.186822	0	0.536255	0	0.536255
KY21.Chr1.1150	KH.C1.336		0.7899	0.9022	KIF3B: kinesin family member 3B	2.87139	2.36202	1.91625	2.13803	2.87139	2.36202	1.91625	2.13803	1.73138	2.19179	1.64983	2.19179
KY21.Chr1.1151	KH.C1.281		0.5139	0.3655	ZNF830: zinc finger protein 830	17.5655	16.0565	17.0321	20.0451	17.5655	16.0565	17.0321	20.0451	10.3998	20.2357	10.0371	20.2357
KY21.Chr1.1152	KH.C1.833		0.5664	0.4823	DNLZ: DNL-type zinc finger	35.8652	40.2248	31.5731	33.4398	35.8652	40.2248	31.5731	33.4398	15.0041	26.4886	19.1102	26.4886
KY21.Chr1.1153	KH.C1.439		0.959	1.5868		78.3575	80.7033	71.3428	90.4716	78.3575	80.7033	71.3428	90.4716	95.4929	99.5723	141.637	99.5723
KY21.Chr1.1154	KH.C1.372		0.1976	0.694		1	1	1	1	0.297435	0.207195	0.23283	0.101712	0.0937784	0.474425	0.237725	0.474425
KY21.Chr1.1155	KH.C1.509		0.3487	0.395		24.5202	21.97	14.952	20.5068	24.5202	21.97	14.952	20.5068	2.66103	7.63036	5.25448	7.63036
KY21.Chr1.1156	KH.C1.505		0.8714	0.77	CASK: calcium/calmodulin dependent serine protein kinase	9.05601	7.38058	7.86816	7.45601	9.05601	7.38058	7.86816	7.45601	6.60634	7.58093	6.52046	7.58093
KY21.Chr1.1157	KH.C1.862		#NUM!	#NUM!		1	1	1	1	0	0	0	0	0	0	2.17311	0
KY21.Chr1.1158	KH.C1.390		0.2569	0.6183		1	1	1	1	0.631629	0.687494	0.463533	0.67498	0.124467	0.484367	0.883453	0.484367
KY21.Chr1.1159	KH.C1.761		2.7673	0.5552	ACP5: acid phosphatase 5, tartrate resistant	1	1	1	1	0.270365	0.117711	0.21164	0.161796	0.596704	0.215623	0.172871	0.215623
KY21.Chr1.116	KH.C1.962		0.9865	0.8579	RAB23: RAB23, member RAS oncogene family	2.75133	2.69642	3.17173	4.02815	2.75133	2.69642	3.17173	4.02815	3.02034	3.06144	3.56114	3.06144
KY21.Chr1.1160	KH.C1.1205		0.4381	0.4183	DDX19B: DEAD-box helicase 19B	33.3951	28.3592	27.9856	29.433	33.3951	28.3592	27.9856	29.433	14.4645	33.0129	12.3876	33.0129
KY21.Chr1.1161	KH.C1.992		1.8215	1.5227		5.1179	5.85939	6.67709	8.34553	5.1179	5.85939	6.67709	8.34553	8.36694	4.59332	7.95372	4.59332
KY21.Chr1.1162	KH.C1.741		1.7263	1.4421	EXOC4: exocyst complex component 4	17.1807	13.9464	17.6117	16.006	17.1807	13.9464	17.6117	16.006	28.1263	16.2927	16.4982	16.2927
KY21.Chr1.1163	KH.C1.398		0.591	0.5247	TCEA1: transcription elongation factor A1	23.0754	22.4627	22.1778	27.0892	23.0754	22.4627	22.1778	27.0892	15.5441	26.3002	15.4636	26.3002
KY21.Chr1.1164	KH.C1.569		0.0772	0.0292		3.84362	3.7609	4.57517	6.33474	3.84362	3.7609	4.57517	6.33474	0.249867	3.23312	0.126681	3.23312
KY21.Chr1.1165	KH.C1.302		1.9005	2.3258	TMPRSS9: transmembrane protease, serine 9	3.87046	3.79771	5.04961	4.9682	3.87046	3.79771	5.04961	4.9682	7.05552	3.71227	9.04314	3.71227
KY21.Chr1.1166	KH.C1.848		1.1023	0.9538	C6orf62: chromosome 6 open reading frame 62	13.4715	11.7745	17.1462	21.2153	13.4715	11.7745	17.1462	21.2153	18.5626	16.8397	15.1387	16.8397
KY21.Chr1.1167	KH.C1.1234		0.2801	0.345	NR2C2AP: nuclear receptor 2C2 associated protein	14.2044	16.5402	12.1718	17.9637	14.2044	16.5402	12.1718	17.9637	3.84251	13.7158	6.58333	13.7158
KY21.Chr1.1168	KH.C1.982		0.4584	0.4486	MRRF: mitochondrial ribosome recycling factor	20.4963	14.5855	10.9267	14.9847	20.4963	14.5855	10.9267	14.9847	7.91071	17.2568	8.19083	17.2568
KY21.Chr1.1169	KH.C1.1133		0.454	0.4109	ALKBH3: alkB homolog 3, alpha-ketoglutaratedependent dioxygenase	3.68361	3.40904	4.20825	4.23733	3.68361	3.40904	4.20825	4.23733	1.33775	2.94606	1.47977	2.94606
KY21.Chr1.117	KH.C1.655		0.6356	0.6653	BARD1: BRCA1 associated RING domain 1	7.63454	6.44192	8.62725	9.35704	7.63454	6.44192	8.62725	9.35704	6.20414	9.76107	5.80492	9.76107
KY21.Chr1.1170	KH.C1.1217		1.3171	1.7783	SCRIB: scribbled planar cell polarity protein	4.05086	6.81947	5.12643	7.01857	4.05086	6.81947	5.12643	7.01857	13.8789	10.537	12.5621	10.537
KY21.Chr1.1171	KH.C1.774		0.6424	0.4441		1	1.003	1	1	0.778289	1.003	0.700625	0.891589	0.208579	0.324677	0.199056	0.324677
KY21.Chr1.1172	KH.C1.1008		0.8338	0.8688	MFAP1: microfibril associated protein 1	19.7595	18.2616	13.9854	15.7709	19.7595	18.2616	13.9854	15.7709	16.7188	20.049	16.5078	20.049
KY21.Chr1.1173	KH.C1.1059		6.0134	4.6589	IRAK1: interleukin 1 receptor associated kinase 1	5.47217	4.41341	5.64706	5.03609	5.47217	4.41341	5.64706	5.03609	26.9169	4.4761	19.8248	4.4761
KY21.Chr1.1174	KH.C1.1095		0.8561	1.0552	DLD: dihydrolipoamide dehydrogenase	10.4549	10.0651	6.06036	10.5014	10.4549	10.0651	6.06036	10.5014	8.60799	10.0548	8.88007	10.0548
KY21.Chr1.1175	KH.C1.328		0.4239	0.4981	MRPL52: mitochondrial ribosomal protein L52	38.9387	44.645	25.7623	30.8012	38.9387	44.645	25.7623	30.8012	10.5949	24.9933	15.6163	24.9933
KY21.Chr1.1176	KH.C1.35		0.7452	0.7999	RAB7A: RAB7A, member RAS oncogene family	60.2935	56.4768	48.8649	62.1187	60.2935	56.4768	48.8649	62.1187	32.7602	43.9589	40.6896	43.9589
KY21.Chr1.1177	KH.C1.7		1.1728	1.1414	USP15: ubiquitin specific peptidase 15	7.25328	6.6688	6.70907	7.6829	7.25328	6.6688	6.70907	7.6829	12.393	10.5662	10.7948	10.5662
KY21.Chr1.1178	0		0	#NUM!		1	1	1	1	0.342559	0	0	0	0	0.105077	0	0.105077
KY21.Chr1.1179	KH.C1.37		0.2336	0		1	1	1	1	0.357818	0.38081	0.311219	0.271912	0.125352	0.536591	0	0.536591
KY21.Chr1.118	SPKH.L140.10003		11.8847	3.0537	NXPE2: neurexophilin and PC-esterase domain family member 2	1	1	1	1	0	0.0923133	0.0345783	0.030211	1.03062	0.0867178	0.621373	0.0867178
KY21.Chr1.1180	KH.C1.643		0.9416	0.6555	MMAB: methylmalonic aciduria (cobalamin deficiency) cblB type	9.13703	10.3277	5.67378	6.53446	9.13703	10.3277	5.67378	6.53446	7.40979	7.86912	7.86453	7.86912
KY21.Chr1.1181	KH.C1.756		0.7472	0.8066	SLC25A11: solute carrier family 25 member 11	24.0082	28.4544	15.4165	25.8223	24.0082	28.4544	15.4165	25.8223	19.121	25.5875	23.3417	25.5875
KY21.Chr1.1182	0		8.9938	#NUM!		1	1	1	1	0.219665	0.334731	0.161206	0.328639	0.909017	0.101071	0.395028	0.101071
KY21.Chr1.1183	SPKH.C1.10473		0.8565	0.5829		1	1.7092	1	1	0.701034	1.7092	0.137191	0.119864	0.442059	0.516086	1.34473	0.516086
KY21.Chr1.1184	SPKH.C1.10648		0.8565	0.2476		2.38352	1.22086	2.05787	2.03768	2.38352	1.22086	2.05787	2.03768	3.31544	3.87065	2.91357	3.87065
KY21.Chr1.1185	SPKH.C1.10473		1.0424	0.3441		4.76703	5.49386	1	1	4.76703	5.49386	0	0.239728	4.75213	4.55876	3.81006	4.55876
KY21.Chr1.1186	SPKH.C1.10473		0.1427	0.4126		1	1	1	1	0.238047	0.552749	0.621139	0.491812	0.171999	1.20481	0.983008	1.20481
KY21.Chr1.1187	KH.C1.931		0.3018	0.3269	GREB1L: growth regulation by estrogen in breast cancer 1 like	19.5167	16.9168	30.0541	18.4394	19.5167	16.9168	30.0541	18.4394	21.4743	71.1356	14.7996	71.1356
KY21.Chr1.1188	0		0	#NUM!		1	1	1	1	0.186393	0	0	0.159348	0	0.343045	0	0.343045
KY21.Chr1.1189	KH.C1.353		0.5484	0.5176		14.0069	13.5518	8.71069	9.89901	14.0069	13.5518	8.71069	9.89901	5.29949	9.66234	5.67215	9.66234
KY21.Chr1.119	KH.L140.3		2.1421	1.6779		15.2364	15.4676	18.254	18.7761	15.2364	15.4676	18.254	18.7761	29.6435	13.8385	23.8505	13.8385
KY21.Chr1.1190	KH.C1.652		0.0455	0.0647	GRID1: glutamate ionotropic receptor delta type subunit 1	1.31029	1.57718	1.44551	1.6583	1.31029	1.57718	1.44551	1.6583	0.151883	3.33357	0.154007	3.33357
KY21.Chr1.1191	KH.C1.686		0.584	0		1	1	1	1	0.065491	0	0.160206	0.0279944	0.129054	0.220977	0	0.220977
KY21.Chr1.1192	KH.C1.274		0.4484	0.5585	MYT1L: myelin transcription factor 1 like	4.21649	3.57739	6.24159	4.97958	4.21649	3.57739	6.24159	4.97958	3.71769	8.29083	3.60767	8.29083
KY21.Chr1.1193	KH.C1.707		0.1396	0.1619		1	1	1	1	0.401371	0.225481	0.405407	0.320997	0.0510276	0.365379	0.113831	0.365379
KY21.Chr1.1194	KH.C1.3		0.2141	0.9716		1	1.38573	6.0211	6.25833	0.424376	1.38573	6.0211	6.25833	0.167252	0.781041	0.254387	0.781041
KY21.Chr1.1195	0		#NUM!	#NUM!		1	1	1	1	0	0	0	0	0	0	0	0
KY21.Chr1.1196	0		#NUM!	#NUM!		1	1	1	1	0	0.170317	0	0	0	0	0	0
KY21.Chr1.1197	SPKH.C1.10287		#NUM!	#NUM!		1	1	1	1	0	0	0	0	0	0	0	0
KY21.Chr1.1198	KH.C1.102		1.6338	2.2068		1.80797	1.18844	1.24876	1.37896	1.80797	1.18844	1.24876	1.37896	1.43906	0.880801	1.89836	0.880801
KY21.Chr1.1199	KH.C1.711		1.5341	1.4928	SNX33: sorting nexin 33	8.55328	9.14421	6.4761	7.50619	8.55328	9.14421	6.4761	7.50619	14.3042	9.32396	14.1737	9.32396
KY21.Chr1.12	KH.L60.4		1.8543	1.8124	GCC1: GRIP and coiled-coil domain containing 1	5.61808	3.9793	5.37417	3.81129	5.61808	3.9793	5.37417	3.81129	10.509	5.66716	9.89645	5.66716
KY21.Chr1.120	KH.L140.1		1.9766	3.1429		8.6208	10.8821	8.88828	10.7829	8.6208	10.8821	8.88828	10.7829	16.4178	8.30575	26.7746	8.30575
KY21.Chr1.1200	KH.C1.1184		0.667	0.5829	MED4: mediator complex subunit 4	4.25643	4.5926	3.44055	3.79706	4.25643	4.5926	3.44055	3.79706	2.96604	4.44668	3.25404	4.44668
KY21.Chr1.1201	KH.C1.1058		0.6009	0.5561		9.66942	10.8754	9.15482	11.6917	9.66942	10.8754	9.15482	11.6917	7.28647	12.1249	5.93934	12.1249
KY21.Chr1.1202	KH.C1.1110		0.8304	1.1617		2.28493	1.23167	2.37774	2.48051	2.28493	1.23167	2.37774	2.48051	1.51516	1.82452	1.59433	1.82452
KY21.Chr1.1203	KH.C1.125		0.5415	1.0541	CNR2: cannabinoid receptor 2	2.80736	2.73877	3.1285	3.0667	2.80736	2.73877	3.1285	3.0667	1.04495	1.92957	2.38921	1.92957
KY21.Chr1.1204	KH.C1.295		0.1037	0.0285		6.99921	8.21259	3.59434	7.5963	6.99921	8.21259	3.59434	7.5963	0.704293	6.79105	0.238048	6.79105
KY21.Chr1.1205	KH.C1.316		7.709	1.1659		1	1	1	1	0.0155048	0.0405028	0.0758568	0.066276	0.0733279	0.00951194	0.0743536	0.00951194
KY21.Chr1.1206	KH.C1.175		4.8916	5.4222		39.667	44.2182	26.5509	35.2331	39.667	44.2182	26.5509	35.2331	224.696	45.9347	186.833	45.9347
KY21.Chr1.1207	KH.C1.638		0.1001	0.0716	C17orf105: chromosome 17 open reading frame 105	7.54112	6.54032	7.17314	8.2706	7.54112	6.54032	7.17314	8.2706	0.852542	8.51542	0.720389	8.51542
KY21.Chr1.1208	KH.C1.467		0.2214	0.3615	AGTR1: angiotensin II receptor type 1	5.11105	4.99963	3.67691	4.51549	5.11105	4.99963	3.67691	4.51549	1.72953	7.81063	2.3838	7.81063
KY21.Chr1.1209	KH.C1.53		1.0421	1.0616	YPEL5: yippee like 5	11.846	13.0741	10.4941	13.9614	11.846	13.0741	10.4941	13.9614	9.56785	9.1813	11.0264	9.1813
KY21.Chr1.121	KH.L140.10		1.0938	1.8731		94.034	105.681	50.1134	62.5258	94.034	105.681	50.1134	62.5258	46.3251	42.3505	117.433	42.3505
KY21.Chr1.1210	KH.C1.342		1.2848	0.2429		1	1	1.19689	1	0.873715	0.912951	1.19689	0	0.275474	0.214403	0.139664	0.214403
KY21.Chr1.1211	KH.C1.1265		1.4833	1.4971	TSPAN7: tetraspanin 7	48.5323	50.4843	39.9997	54.6285	48.5323	50.4843	39.9997	54.6285	52.953	35.6986	70.6125	35.6986
KY21.Chr1.1212	KH.C1.447		0.5432	0.5604	IPO5: importin 5	6.59889	6.07367	5.10693	6.69585	6.59889	6.07367	5.10693	6.69585	5.04213	9.28074	4.51674	9.28074
KY21.Chr1.1213	KH.C1.244		0.7568	0.7598	COL4A6: collagen type IV alpha 6 chain	16.0489	24.2323	73.8269	27.389	16.0489	24.2323	73.8269	27.389	98.1492	129.687	62.2539	129.687
KY21.Chr1.1214	KH.C1.24		0.584	0.2323		1	1	4.70437	1	0.060858	0.370947	4.70437	0.728391	2.15864	3.69619	0.535049	3.69619
KY21.Chr1.1215	KH.S655.2		0.6341	0.34	COL4A6: collagen type IV alpha 6 chain	4.05999	7.72487	36.8365	8.53007	4.05999	7.72487	36.8365	8.53007	30.6939	48.4028	14.3812	48.4028
KY21.Chr1.1216	KH.S655.1		0	0		1	1	2.12364	1.11326	0.434065	0.755929	2.12364	1.11326	0	1.06516	0	1.06516
KY21.Chr1.1217	KH.S655.3		0	0.4318		1	1.88123	1.32124	1.26981	0.675144	1.88123	1.32124	1.26981	0	0.0828377	0.431687	0.0828377
KY21.Chr1.1218	KH.S655.3		0.4588	0.5113		2.8961	4.0052	9.3349	13.6902	2.8961	4.0052	9.3349	13.6902	0.671406	1.46317	1.36159	1.46317
KY21.Chr1.1219	KH.S655.4		0.314	0.2996		112.527	100.031	57.1898	76.0987	112.527	100.031	57.1898	76.0987	2.91243	9.27314	13.2893	9.27314
KY21.Chr1.122	KH.L140.11		0.9194	2.1314		39.1531	41.8628	41.3403	49.1965	39.1531	41.8628	41.3403	49.1965	45.5028	49.4919	100.575	49.4919
KY21.Chr1.1220	KH.C1.365		0.3688	0.4278		2146.18	2315.66	665.621	914.719	2146.18	2315.66	665.621	914.719	89.7175	243.246	246.64	243.246
KY21.Chr1.1221	KH.S1219.1		0	#NUM!		1	1	1	1	0.0811094	0.211879	0.317459	0.208023	0	0.149277	0	0.149277
KY21.Chr1.1222	SPKH.L78.10010		#NUM!	#NUM!		1	1	1	1	0.271989	0.118418	0.13307	0.116263	0	0	0	0
KY21.Chr1.1223	KH.C1.365	TaGup	#NUM!	#NUM!		18.9355	44.3017	12.9136	25.5086	18.9355	44.3017	12.9136	25.5086	0	0	0	0
KY21.Chr1.1224	KH.C1.365		0.0105	0.0068	ANOS1: anosmin 1	3.8547	3.39171	4.03556	5.0353	3.8547	3.39171	4.03556	5.0353	0.0743659	7.03649	0.0538615	7.03649
KY21.Chr1.1225	SPKH.C1.10431		0	0		5.92986	6.5139	9.19444	8.34514	5.92986	6.5139	9.19444	8.34514	0	13.1523	0	13.1523
KY21.Chr1.1226	KH.C1.409		0.8359	0.7927	UBA1: ubiquitin like modifier activating enzyme 1	14.0158	11.7917	10.6841	11.6455	14.0158	11.7917	10.6841	11.6455	15.4298	18.4579	11.9116	18.4579
KY21.Chr1.1227	KH.C1.1280		0.8259	2.1862	ADGRL3: adhesion G protein-coupled receptor L3	1	1	1	1	0.0489654	0.0106592	0.0419232	0.0418609	0.0434203	0.0525689	0.0440276	0.0525689
KY21.Chr1.1228	KH.C1.200		1.8787	1.5977		5.13109	4.60688	7.5431	5.22615	5.13109	4.60688	7.5431	5.22615	16.2843	8.66783	10.8412	8.66783
KY21.Chr1.1229	KH.C1.1244		0.7709	0.7387	RTCA: RNA 3'-terminal phosphate cyclase	10.6993	9.20036	9.75164	9.91625	10.6993	9.20036	9.75164	9.91625	8.03936	10.4285	5.91406	10.4285
KY21.Chr1.123	KH.C1.969		#NUM!	2.4291		1	1	1	1	0	0	0	0	0.0336911	0	0.170812	0
KY21.Chr1.1230	SPKH.C1.10042		0	1.9433		1	1	1	1	0.269292	0	0.527001	0.23022	0	0.330412	0.430465	0.330412
KY21.Chr1.1231	KH.C1.1232		0.5085	0.4	GTF3A: general transcription factor IIIA	12.2892	10.9631	11.2585	10.8151	12.2892	10.9631	11.2585	10.8151	4.51093	8.86962	4.71847	8.86962
KY21.Chr1.1232	KH.C1.675		0.4986	0.4549	CWC15: CWC15 spliceosome associated protein homolog	38.6099	37.8396	36.4246	44.2078	38.6099	37.8396	36.4246	44.2078	23.8849	47.8957	23.8359	47.8957
KY21.Chr1.1233	KH.C1.1236		0.6949	0.6162	RRAGA: Ras related GTP binding A	9.46328	8.00098	8.78182	10.5173	9.46328	8.00098	8.78182	10.5173	7.79607	11.2178	7.14877	11.2178
KY21.Chr1.1234	KH.C1.12		0.6706	0.8076	CYP3A4: cytochrome P450 family 3 subfamily A member 4	6.43656	5.3455	6.40734	6.80676	6.43656	5.3455	6.40734	6.80676	3.13792	4.67911	3.80628	4.67911
KY21.Chr1.1235	KH.C1.362		0.2158	0.4526	PMVK: phosphomevalonate kinase	11.0972	11.0605	6.1472	8.46783	11.0972	11.0605	6.1472	8.46783	2.31329	10.7183	3.99493	10.7183
KY21.Chr1.1236	KH.C1.362		0.7448	0.8372	POLR3H: RNA polymerase III subunit H	10.8614	11.5593	10.8094	14.6028	10.8614	11.5593	10.8094	14.6028	8.78074	11.7888	10.1649	11.7888
KY21.Chr1.1237	KH.C1.339		0.9029	1.2022	RASA3: RAS p21 protein activator 3	2.82139	2.15034	3.04969	2.53559	2.82139	2.15034	3.04969	2.53559	2.50622	2.77557	3.29964	2.77557
KY21.Chr1.1238	KH.C1.685		1.8608	1.0464	DUXA: double homeobox A	1	1	1	1	0.230897	0.261371	0.361489	0.256614	0.764395	0.410788	0.516725	0.410788
KY21.Chr1.1239	KH.C1.1076		0.9109	0.9639	DYM: dymeclin	14.1201	14.5647	14.1807	13.9078	14.1201	14.5647	14.1807	13.9078	13.3648	14.6717	14.353	14.6717
KY21.Chr1.124	KH.C1.172		0.5444	0.4633	MPHOSPH10: M-phase phosphoprotein 10	20.6664	20.5375	16.7137	21.4991	20.6664	20.5375	16.7137	21.4991	14.4125	26.4724	13.3042	26.4724
KY21.Chr1.1240	KH.C1.34		#NUM!	#NUM!		1	1	1	1	0	0	0	0	0	0	0	0
KY21.Chr1.1241	KH.C1.179		1.0892	1.0129	ABCF3: ATP binding cassette subfamily F member 3	4.05794	3.95329	3.44975	4.61982	4.05794	3.95329	3.44975	4.61982	7.18887	6.59957	6.10128	6.59957
KY21.Chr1.1242	KH.C1.380		1.6584	1.8235	CHSY3: chondroitin sulfate synthase 3	5.37502	5.05427	4.24277	3.65953	5.37502	5.05427	4.24277	3.65953	9.59815	5.78758	9.1013	5.78758
KY21.Chr1.1243	KH.C1.808		0.1289	0.044		19.7729	21.3147	21.1599	26.918	19.7729	21.3147	21.1599	26.918	2.36742	18.3644	1.20027	18.3644
KY21.Chr1.1244	KH.C1.731		0.003	0	ECEL1: endothelin converting enzyme like 1	4.81495	4.30386	5.67366	4.89156	4.81495	4.30386	5.67366	4.89156	0.0302011	9.92726	0	9.92726
KY21.Chr1.1245	KH.C1.54		0.8655	0.5776	NOTCH1: notch 1	1.35994	1.54853	2.17366	1.45722	1.35994	1.54853	2.17366	1.45722	2.32334	2.6841	1.17546	2.6841
KY21.Chr1.1246	KH.C1.418		1.1991	0.1388		1	1	1	1	0.257267	0.448034	0.377601	0.659819	1.41949	1.18372	0.102811	1.18372
KY21.Chr1.1247	KH.C1.154		#NUM!	#NUM!		1	1	1	1	0	0	0	0	0	0	0	0
KY21.Chr2.1293	0	TaGup	#NUM!	#NUM!		2.75844	5.72768	2.28387	7.07464	2.75844	5.72768	2.28387	7.07464	4.34855	0	12.5498	0
KY21.Chr1.1249	KH.C1.1060		0.9665	1.9433	SLC19A2: solute carrier family 19 member 2	1	1.41053	1	3.07371	0.414851	1.41053	0.773197	3.07371	1.27684	1.321	1.32628	1.321
KY21.Chr1.125	SPKH.C1.10350		#NUM!	#NUM!		1	1	1	1	0.0779821	0	0.0763048	0	0	0	0	0
KY21.Chr1.1250	KH.C1.651		0.0845	0.0844	TTC34: tetratricopeptide repeat domain 34	1	1	1	1	0.185515	0.161539	0.138813	0.13061	0.0430082	0.508799	0.0348878	0.508799
KY21.Chr1.1251	KH.C1.571		0.4411	0.4361	PLOD3: procollagen-lysine,2-oxoglutarate 5-dioxygenase 3	12.7723	10.7996	12.196	13.6588	12.7723	10.7996	12.196	13.6588	10.286	23.3176	9.40785	23.3176
KY21.Chr1.1252	KH.C1.794		2.8908	2.4291		1	1	1	1	0	0.122357	0.0687477	0.12013	0.498419	0.17241	0.280772	0.17241
KY21.Chr1.1253	0		#NUM!	#NUM!		1	1	1	1	0	0	0	0	0.156102	0	0	0
KY21.Chr1.1254	0		26.3392	#NUM!		1	1	1	1	0.178015	0.077504	0	0	2.87649	0.109209	1.70735	0.109209
KY21.Chr1.1255	KH.C1.319		9.6362	#NUM!		1	1	1	1	0	0	0.0518771	0	0.626846	0.0650505	0.762736	0.0650505
KY21.Chr1.1256	KH.C1.319		#NUM!	#NUM!		1	1	1	1	0	0	0	0	0	0	0	0
KY21.Chr1.1257	KH.C1.1211		3.033	1.9729	LAMA2: laminin subunit alpha 2	1	1	2.17464	1	0.789983	0.576565	2.17464	0.532443	3.87305	1.27696	2.09592	1.27696
KY21.Chr1.1258	0		0	#NUM!		1	1	2.17036	1	0.211245	0	2.17036	0.180595	0	0.129595	0.0844189	0.129595
KY21.Chr1.1259	0		0	0		1	1	1	1	0.259727	0.226159	0.381211	0.111021	0	0.159338	0	0.159338
KY21.Chr1.126	KH.C1.183		0.5391	0.446		19.3338	22.6457	13.0181	17.1864	19.3338	22.6457	13.0181	17.1864	10.5309	19.5337	15.0389	19.5337
KY21.Chr1.1260	SPKH.C1.10318		#NUM!	#NUM!		1	1	1	1	0	0	0	0	0	0	0	0
KY21.Chr1.1261	KH.C1.1129		#NUM!	#NUM!		1	1	1	1	0.0282245	0	0	0	0	0	0	0
KY21.Chr1.1262	KH.C1.1129		1.4526	1.8183	ODC1: ornithine decarboxylase 1	63.7526	54.8391	48.9436	57.2683	63.7526	54.8391	48.9436	57.2683	65.8531	45.3341	104.599	45.3341
KY21.Chr1.1263	KH.C1.775		0.8336	1.0339		11.4072	11.8006	13.1653	16.7536	11.4072	11.8006	13.1653	16.7536	8.37667	10.0486	12.9356	10.0486
KY21.Chr1.1264	KH.C1.586		#NUM!	#NUM!		1	1	1	1	0	0	0	0.0407153	0	0	0.0380646	0
KY21.Chr1.1265	SPKH.C1.10061		0.4469	0.1143	TINAG: tubulointerstitial nephritis antigen	1	1	1	1	0.279462	0.2995	0.252417	0.27567	0.135557	0.303326	0.0343632	0.303326
KY21.Chr1.1266	KH.C1.499		2.6807	3.2388		2.50063	2.30367	3.40431	3.90382	2.50063	2.30367	3.40431	3.90382	4.82767	1.80089	10.138	1.80089
KY21.Chr1.1267	SPKH.C1.10396		0.0267	0.094	COL6A6: collagen type VI alpha 6 chain	1	1	1	1	0.107188	0.0800009	0.314647	0.117817	0.0120697	0.45091	0.0367157	0.45091
KY21.Chr1.1268	KH.C1.829		0.1955	0.8636	COL21A1: collagen type XXI alpha 1 chain	1	1	1	1	0.130245	0.178218	0.382331	0.222695	0.102662	0.525076	0.11897	0.525076
KY21.Chr1.1269	KH.C1.946		2.5696	0.0971		1	1	1	1	0.506795	0	0.070842	0	0.114134	0.0444156	0.0578652	0.0444156
KY21.Chr1.127	0		#NUM!	#NUM!		1	1	1	1	0	0	0	0	0	0	0	0
KY21.Chr1.1270	KH.C1.229		#NUM!	0	CPB1: carboxypeptidase B1	1	1	1	1	0	0.0663787	0	0.0325853	0.090131	0	0	0
KY21.Chr1.1271	KH.C1.330		0.8763	0.9402		11.6523	16.7607	14.7907	17.2238	11.6523	16.7607	14.7907	17.2238	10.6991	12.2093	10.0746	12.2093
KY21.Chr1.1272	0		#NUM!	#NUM!		1	1	1	1	0	0	0	0	0	0	0	0
KY21.Chr1.1273	KH.C1.784		#NUM!	#NUM!		1	1	1	1	0	0	0	0	0	0	0	0
KY21.Chr1.1274	KH.C1.330		#NUM!	#NUM!		1	1	1	1	0	0	0	0	0	0	0	0
KY21.Chr1.1275	KH.C1.407		0.4911	0.3938	PTBP1: polypyrimidine tract binding protein 1	21.7265	19.3389	22.0203	21.4176	21.7265	19.3389	22.0203	21.4176	13.9329	28.369	11.1479	28.369
KY21.Chr1.1276	KH.C1.904		0.7137	0.5715	RBM25: RNA binding motif protein 25	34.4484	31.3251	38.1076	34.0634	34.4484	31.3251	38.1076	34.0634	34.9296	48.9381	25.9211	48.9381
KY21.Chr1.1277	KH.C1.76		0	#NUM!	HMCN1: hemicentin 1	1	1	1	1	0	0.016082	0.0180718	0	0	0.0226609	0	0.0226609
KY21.Chr1.1278	KH.C1.926		#NUM!	#NUM!	HMCN1: hemicentin 1	1	1	1	1	0	0	0.0228652	0	0	0	0	0
KY21.Chr1.1279	KH.C1.1063		0.8646	0.967	SLC7A9: solute carrier family 7 member 9	5.58022	8.3835	4.69115	6.14799	5.58022	8.3835	4.69115	6.14799	9.94303	11.4996	6.53295	11.4996
KY21.Chr1.128	SPKH.S992.10001		#NUM!	1.9433		1	1	1	1	0	0	0.107907	0.031426	0.0869245	0	0.11752	0
KY21.Chr1.1280	SPKH.C3.10416		0.1427	0.4858		1	1	1	1	0	0.124192	0.139558	0	0.0562108	0.393743	0.056997	0.393743
KY21.Chr1.1281	SPKH.L35.10001		1.8558	#NUM!		1	1	1	1	0	0	0.0325116	0.0568107	0.340467	0.183453	0.0796683	0.183453
KY21.Chr1.1282	KH.C1.210		0.6424	0.5829		1	1	1	1	0.102105	0.177818	0.0999093	0	0.482893	0.751679	0.489648	0.751679
KY21.Chr1.1283	KH.C1.31		0.8184	1.008	ARRDC3: arrestin domain containing 3	1.12384	1	1.32791	1.16019	1.12384	0.978593	1.32791	1.16019	0.718703	0.878083	1.40667	0.878083
KY21.Chr1.1284	SPKH.C1.10003		0.1665	0.1821	SLC7A9: solute carrier family 7 member 9	14.0962	12.0528	6.72222	6.91732	14.0962	12.0528	6.72222	6.91732	2.96828	17.8262	3.41652	17.8262
KY21.Chr1.1285	SPKH.C1.10003		0.8565	0.1821	SLC7A9: solute carrier family 7 member 9	1	1	1	1	0.16071	0.13994	0.104836	0.297684	0.126676	0.147889	0.064224	0.147889
KY21.Chr1.1286	KH.C1.428		1.3751	1.5751		11.6536	12.0699	10.7033	11.2282	11.6536	12.0699	10.7033	11.2282	17.9165	13.0288	19.1296	13.0288
KY21.Chr1.1287	KH.C1.1231		1.4616	1.2851	GCC2: GRIP and coiled-coil domain containing 2	3.78353	3.20081	5.41146	3.96359	3.78353	3.20081	5.41146	3.96359	8.95336	6.12534	8.46321	6.12534
KY21.Chr1.1288	KH.C1.491		1.4604	1.2575	USP8: ubiquitin specific peptidase 8	8.86942	7.51549	7.88545	6.93027	8.86942	7.51549	7.88545	6.93027	13.7567	9.41977	10.7286	9.41977
KY21.Chr1.1289	KH.C1.385		0.3877	0.4398	MSL2: MSL complex subunit 2	8.44057	9.51843	7.85285	8.93116	8.44057	9.51843	7.85285	8.93116	3.65374	9.42252	4.75547	9.42252
KY21.Chr1.129	KH.C1.526		0.5342	0.7287	IFT88: intraflagellar transport 88	2.216	1.64106	2.02648	1.55807	2.216	1.64106	2.02648	1.55807	1.37125	2.56649	1.14214	2.56649
KY21.Chr1.1290	KH.C1.209		0.6287	0.5363	MRPS22: mitochondrial ribosomal protein S22	6.13639	5.68077	6.27829	8.50411	6.13639	5.68077	6.27829	8.50411	5.05749	8.04428	4.4743	8.04428
KY21.Chr1.1291	KH.C1.694		0.8108	1.1981	ENPP7: ectonucleotide pyrophosphatase/phosphodiesterase 7	6.90087	6.61229	7.53887	6.75256	6.90087	6.61229	7.53887	6.75256	4.52195	5.57674	4.4523	5.57674
KY21.Chr1.1292	KH.C1.364		0.4528	0.4546		2.99783	3.32613	3.21722	3.3896	2.99783	3.32613	3.21722	3.3896	1.63883	3.6189	1.97092	3.6189
KY21.Chr1.1293	KH.C1.978		0.7548	0.6454		3.93583	2.32349	3.29634	3.30774	3.93583	2.32349	3.29634	3.30774	3.70701	4.91097	2.42593	4.91097
KY21.Chr1.1294	0		0	0.3533		1	1	1	1	0.19763	0.516263	0.19338	0.337911	0	0.121243	0.631825	0.121243
KY21.Chr1.1295	KH.C1.932		0.3978	0.4236		16.1375	17.7295	9.99239	11.2632	16.1375	17.7295	9.99239	11.2632	3.67688	9.24266	3.7787	9.24266
KY21.Chr1.1296	KH.C1.1172		0.7137	0.9107	CUEDC1: CUE domain containing 1	7.2399	6.72823	9.022	7.99354	7.2399	6.72823	9.022	7.99354	5.50195	7.70798	6.5909	7.70798
KY21.Chr1.1297	KH.C1.212		1.7604	1.4141	DPY19L1: dpy-19 like 1	18.0318	18.2651	14.3156	18.2766	18.0318	18.2651	14.3156	18.2766	22.5162	12.79	15.9759	12.79
KY21.Chr1.1298	KH.C1.279		5.247	3.2745	FBLN1: fibulin 1	1	1	1.03045	1	0.645904	0.664313	1.03045	0.756257	2.51608	0.47952	1.60109	0.47952
KY21.Chr1.1299	0		#NUM!	#NUM!		1	1	1	1	0	0	0	0	0	0	0	0
KY21.Chr1.13	0		#NUM!	#NUM!		1	1	1	1	0	0	0	0	0	0	0	0
KY21.Chr1.130	KH.C1.1180		1.8121	1.4079	ARFGEF2: ADP ribosylation factor guanine nucleotide exchange factor 2	2.08773	1.80092	1.871	1.71476	2.08773	1.80092	1.871	1.71476	5.23211	2.88716	3.32165	2.88716
KY21.Chr1.1300	KH.C1.1178		0.5349	0.4409	TMEM209: transmembrane protein 209	6.56499	6.7677	4.51128	6.48726	6.56499	6.7677	4.51128	6.48726	4.10532	7.67413	3.38166	7.67413
KY21.Chr1.1301	KH.C1.413		1.4963	1.3011	TPP2: tripeptidyl peptidase 2	8.84558	7.0929	6.91406	7.93771	8.84558	7.0929	6.91406	7.93771	18.0588	12.0683	11.8902	12.0683
KY21.Chr1.1302	KH.C1.480		0.5378	1.308	FBXO36: F-box protein 36	2.99402	2.70997	1.73465	3.16583	2.99402	2.70997	1.73465	3.16583	0.558939	1.03923	1.10203	1.03923
KY21.Chr1.1303	KH.C1.822		0.5428	0.315		1	1	3.37076	1	0.256142	0.318625	3.37076	0.446894	0.819954	1.51046	0.597455	1.51046
KY21.Chr1.1304	KH.C1.197		#NUM!	#NUM!		1	1	1	1	0	0	0	0	0	0	0	0
KY21.Chr1.1305	0		0	#NUM!		1	1	1	1	0	0	0.493888	0	0	0.103217	0	0.103217
KY21.Chr1.1306	KH.C1.721		0.5863	0.4741	FAM185A: family with sequence similarity 185 member A	6.28647	8.47993	7.25351	12.0535	6.28647	8.47993	7.25351	12.0535	6.44458	10.9903	4.12413	10.9903
KY21.Chr1.1307	KH.C1.762		0.3842	0.4515	LAMTOR5: late endosomal/lysosomal adaptor, MAPK and MTOR activator 5	21.1752	20.9419	17.6832	14.6695	21.1752	20.9419	17.6832	14.6695	6.69073	17.4141	11.7814	17.4141
KY21.Chr1.1308	KH.C1.1031		0.4188	0.4446	UXT: ubiquitously expressed prefoldin like chaperone	27.8372	32.9446	21.8414	31.3135	27.8372	32.9446	21.8414	31.3135	9.03495	21.5717	11.1589	21.5717
KY21.Chr1.1309	KH.C1.679		0.5778	0.5107		10.2436	10.3864	8.73135	9.6914	10.2436	10.3864	8.73135	9.6914	3.69621	6.39596	4.47566	6.39596
KY21.Chr1.131	KH.C1.907		0.2141	0.2776	SLC10A1: solute carrier family 10 member 1	1	1	1	1	0.100735	0.0877155	0.16428	0.129179	0.0661683	0.308995	0.0268375	0.308995
KY21.Chr1.1310	KH.C1.861		0.4925	0.4864	PSMA3: proteasome subunit alpha 3	52.7656	47.7933	51.8316	57.8059	52.7656	47.7933	51.8316	57.8059	24.5448	49.8367	22.536	49.8367
KY21.Chr1.1311	KH.C1.236		0.611	0.9716		10.6518	9.62608	9.01423	10.3861	10.6518	9.62608	9.01423	10.3861	4.85609	7.9476	10.8604	7.9476
KY21.Chr1.1312	KH.C1.768		0.6507	0.7154	NCK1: NCK adaptor protein 1	11.9585	14.2342	12.4775	15.6129	11.9585	14.2342	12.4775	15.6129	8.30844	12.7674	8.74167	12.7674
KY21.Chr1.1313	KH.C1.253		#NUM!	#NUM!		1	1	1	1	0	0.21869	0	0	0	0	0	0
KY21.Chr1.1314	KH.C1.456		0.5745	0.577	CHEK1: checkpoint kinase 1	9.36183	8.51579	6.76812	9.23618	9.36183	8.51579	6.76812	9.23618	9.33935	16.2556	7.39895	16.2556
KY21.Chr1.1315	KH.C1.565		0	#NUM!		1	1	1	1	0.486775	0.726621	0	0.475597	0	0.298628	0	0.298628
KY21.Chr1.1316	KH.C1.976		1.1306	0.9097	HS6ST1: heparan sulfate 6-O-sulfotransferase 1	4.89008	3.33333	2.94827	4.47616	4.89008	3.33333	2.94827	4.47616	4.71104	4.16663	3.77023	4.16663
KY21.Chr1.1317	0		#NUM!	#NUM!		1	1	1	1	0	0	0	0	0	0	0	0
KY21.Chr1.1318	0		#NUM!	#NUM!		1	1	1	1	0	0	0	0	0	0	0	0
KY21.Chr1.1319	KH.C1.248		1.6746	1.7425		27.1951	36.5871	26.6101	25.9721	27.1951	36.5871	26.6101	25.9721	46.2512	27.6183	48.0241	27.6183
KY21.Chr1.132	KH.C1.907		0.4606	0.25	SLC10A1: solute carrier family 10 member 1	1.62265	1.49856	1.49152	1.39772	1.62265	1.49856	1.49152	1.39772	0.368201	0.79939	0.432302	0.79939
KY21.Chr1.1320	KH.C1.153		1.5659	1.6023	PIM3: Pim-3 proto-oncogene, serine/threonine kinase	6.2319	7.96364	8.05871	5.34294	6.2319	7.96364	8.05871	5.34294	10.0258	6.40233	10.7221	6.40233
KY21.Chr1.1321	0		#NUM!	#NUM!		1	1	1	1	0	0	0	0	0	0	0	0
KY21.Chr1.1322	KH.C1.614		#NUM!	#NUM!		1	1	1	1	0	0	0	0	0	0	0	0
KY21.Chr1.1323	0		#NUM!	#NUM!		1	1	1	1	0	0	0	0	0	0	0	0
KY21.Chr1.1324	KH.C1.16		#NUM!	#NUM!	SLC43A3: solute carrier family 43 member 3	1	1	1	1	0	0	0	0	0	0	0	0
KY21.Chr1.1325	KH.C1.718		#NUM!	#NUM!	SLC43A3: solute carrier family 43 member 3	1	1	1	1	0	0.150316	0.0563048	0	0.13607	0	0	0
KY21.Chr1.1326	KH.C1.849		21.9009	160.066		42.5356	48.6036	36.6799	35.8479	42.5356	48.6036	36.6799	35.8479	822.964	37.5766	816.577	37.5766
KY21.Chr1.1327	SPKH.C1.10526		#NUM!	#NUM!		1	1	1	1	0	0	0	0	0.316156	0	0	0
KY21.Chr1.1328	0		#NUM!	#NUM!		1	1	1	1	0	0	0	0	0	0	0.550558	0
KY21.Chr1.1329	KH.C1.350		0.9441	1.0979	SIGMAR1: sigma non-opioid intracellular receptor 1	7.33312	7.70951	8.53111	9.30259	7.33312	7.70951	8.53111	9.30259	8.71019	9.22552	8.45389	9.22552
KY21.Chr1.133	KH.C1.286		0.7079	0.4346	RGS22: regulator of G protein signaling 22	1	1	1	1	0.122103	0.12019	0.342848	0.15885	0.112983	0.159587	0.0721327	0.159587
KY21.Chr1.1330	KH.C1.1007		0.9899	0.6117	C11orf70: chromosome 11 open reading frame 70	2.14825	2.9462	3.36328	3.81086	2.14825	2.9462	3.36328	3.81086	1.98964	2.00982	1.45945	2.00982
KY21.Chr1.1331	0		#NUM!	#NUM!		1	1	1	1	0	0.344893	0	0	0.312204	0	0.316571	0
KY21.Chr1.1332	KH.C1.70		1.1501	0.8792	OSBPL8: oxysterol binding protein like 8	19.6168	16.4963	21.825	19.7314	19.6168	16.4963	21.825	19.7314	25.5671	22.2299	17.1041	22.2299
KY21.Chr1.1333	KH.C1.882		0.7843	0.6532	TM2D3: TM2 domain containing 3	47.6407	43.4741	42.8637	47.0331	47.6407	43.4741	42.8637	47.0331	37.9004	48.3191	35.4245	48.3191
KY21.Chr1.1334	KH.C1.815		0.6973	0.7634		12.4013	12.4792	12.229	15.6347	12.4013	12.4792	12.229	15.6347	8.44377	12.1076	10.6059	12.1076
KY21.Chr1.1335	KH.C1.521		0.0513	0.0161	RXFP1: relaxin/insulin like family peptide receptor 1	1	1	1.32616	1.01933	0.943568	0.769333	1.32616	1.01933	0.114942	2.23651	0.0274236	2.23651
KY21.Chr1.1336	KH.C1.116		0.8039	0.8338	HCFC1: host cell factor C1	3.21687	3.15518	8.48812	4.24106	3.21687	3.15518	8.48812	4.24106	9.359	11.6414	6.03049	11.6414
KY21.Chr1.1337	KH.C1.727		0.0033	0	ZIC3: Zic family member 3	20.8005	18.857	19.1738	16.4862	20.8005	18.857	19.1738	16.4862	0.0612916	18.509	0	18.509
KY21.Chr1.1338	KH.C1.504		1.8115	1.8407	TRIP12: thyroid hormone receptor interactor 12	4.04244	3.47546	4.13634	1.52625	4.04244	3.47546	4.13634	1.52625	7.39867	4.08422	6.03755	4.08422
KY21.Chr1.1339	KH.C1.1073		0	0.3701		1	1	1	1	0.159944	0.185697	0.208672	0.227896	0	1.17748	0.340895	1.17748
KY21.Chr1.134	KH.C1.560		#NUM!	#NUM!		1	1	1	1	0	0	0	0	0	0	0	0
KY21.Chr1.1340	KH.C1.293		1.2848	0		1	1	1.01656	1	0.909046	0.678477	1.01656	0.666128	0.204724	0.159338	0	0.159338
KY21.Chr1.1341	KH.C1.1273		0.6375	0.5033	EZH2: enhancer of zeste 2 polycomb repressive complex 2 subunit	3.77663	3.53406	4.26695	3.71081	3.77663	3.53406	4.26695	3.71081	3.61983	5.67793	2.31014	5.67793
KY21.Chr1.1342	KH.C1.1079		1.618	2.1425	DUSP1: dual specificity phosphatase 1	5.91977	7.59298	6.08086	7.0348	5.91977	7.59298	6.08086	7.0348	33.1856	20.5092	44.7616	20.5092
KY21.Chr1.1343	KH.C1.750		2.7124	0.8636		1	1	1	1	0.0744403	0.453735	0.145678	0.127279	1.11484	0.41101	0.475972	0.41101
KY21.Chr1.1344	KH.C1.1148		1.5085	1.5252	FUT5: fucosyltransferase 5	8.05722	8.23602	7.34527	8.04334	8.05722	8.23602	7.34527	8.04334	18.0863	11.989	16.1994	11.989
KY21.Chr1.1345	KH.C1.892		0.7926	0.5593	DUSP14: dual specificity phosphatase 14	8.48319	7.89331	5.97652	9.40732	8.48319	7.89331	5.97652	9.40732	5.84606	7.37522	5.30793	7.37522
KY21.Chr1.1346	KH.C1.545		0.7354	0.5721	GRIK2: glutamate ionotropic receptor kainate type subunit 2	1	1	1	1	0.648329	0.549873	0.436654	0.431892	0.577398	0.785146	0.356668	0.785146
KY21.Chr1.1347	KH.C1.459		0.4542	0.3444	SNX33: sorting nexin 33	7.32929	5.73284	6.10309	7.19945	7.32929	5.73284	6.10309	7.19945	4.81704	10.6032	3.94446	10.6032
KY21.Chr1.1348	0		0	#NUM!		1	1	1	1	0.0319638	0.0834979	0.0312763	0.109304	0	0.0392184	0.0255471	0.0392184
KY21.Chr1.1349	KH.C1.410		0.5878	0.5476	CDC5L: cell division cycle 5 like	20.6307	17.4222	17.4119	16.3807	20.6307	17.4222	17.4119	16.3807	11.818	20.1041	9.12222	20.1041
KY21.Chr1.135	0		#NUM!	#NUM!		1	1	1	1	0	0.332427	0	0	0	0	0	0
KY21.Chr1.1350	KH.C1.433		0.4814	0.5066		124.877	160.244	119.367	140.608	124.877	160.244	119.367	140.608	37.7804	78.4782	60.8585	78.4782
KY21.Chr1.1351	KH.C1.1043		0.8239	0.7046	MTF1: metal regulatory transcription factor 1	2.46056	2.6249	3.55474	3.07273	2.46056	2.6249	3.55474	3.07273	2.05118	2.48951	2.25491	2.48951
KY21.Chr1.1352	KH.C1.1293		0.9129	1.2145	MEGF6: multiple EGF like domains 6	1	1	1	1	0.267023	0.197416	0.133105	0.0603004	0.107223	0.117451	0.0604015	0.117451
KY21.Chr1.1353	KH.C1.579		#NUM!	#NUM!		1	1	1	1	0	0	0	0	0	0	0	0
KY21.Chr1.1354	KH.C1.391		#NUM!	#NUM!		1	1	1	1	0.0504834	0	0	0	0	0	0	0
KY21.Chr1.1355	KH.C1.9		#NUM!	#NUM!		1	1	1	1	0	0	0	0	0	0	0	0
KY21.Chr1.1356	KH.C1.551		0.3212	0	XPNPEP1: X-prolyl aminopeptidase 1	1	1	1	1	0	0	0.0289273	0	0.0349536	0.108819	0	0.108819
KY21.Chr1.1357	KH.C1.713		0	3.4008		1	1	1	1	0.220557	0.288077	0.107907	0.188556	0	0.135308	0.308491	0.135308
KY21.Chr1.1358	KH.C1.135		0.6232	0.63	SPG21: SPG21, maspardin	13.2059	11.9358	7.9603	10.3371	13.2059	11.9358	7.9603	10.3371	6.41244	10.2894	7.39284	10.2894
KY21.Chr1.1359	KH.C1.647		0.5766	0.5993	CWC27: CWC27 spliceosome associated protein homolog	6.75638	5.81185	4.30721	5.77608	6.75638	5.81185	4.30721	5.77608	3.88927	6.74491	3.84549	6.74491
KY21.Chr1.136	KH.L144.3		0.4968	0.5023	MYB: MYB proto-oncogene, transcription factor	1	1	1	1	0.467976	0.496078	0.95564	0.634904	0.561326	1.12966	0.617964	1.12966
KY21.Chr1.1360	KH.C1.653		0.978	0.4572	CFAP46: cilia and flagella associated protein 46	1	1	1	1	0.088003	0.0795764	0.17222	0.118639	0.136065	0.139124	0.043284	0.139124
KY21.Chr1.1361	KH.C1.644		0.4654	0.4247	SHQ1: SHQ1, H/ACA ribonucleoprotein assembly factor	5.77541	6.22506	10.0194	11.9299	5.77541	6.22506	10.0194	11.9299	7.5052	16.126	5.11504	16.126
KY21.Chr1.1362	KH.L18.139		0.5713	0.5888	RPL4: ribosomal protein L4	437.282	445.83	334.499	432.345	437.282	445.83	334.499	432.345	209.436	366.541	253.494	366.541
KY21.Chr1.1363	KH.L18.35		0.9237	0.7337		6.92707	8.21229	3.97775	5.06011	6.92707	8.21229	3.97775	5.06011	5.63954	6.10511	5.69243	6.10511
KY21.Chr1.1364	KH.L18.41		0.6558	0.714	SUN1: Sad1 and UNC84 domain containing 1	13.0354	11.0722	10.7022	11.0675	13.0354	11.0722	10.7022	11.0675	9.57913	14.6049	9.21212	14.6049
KY21.Chr1.1365	KH.L18.54		0.6153	0.4989	FUNDC1: FUN14 domain containing 1	17.1504	18.8754	18.0292	23.3283	17.1504	18.8754	18.0292	23.3283	9.14626	14.863	10.65	14.863
KY21.Chr1.1366	KH.L18.68		#NUM!	#NUM!		1	1	1	1	0	0	0	0	0	0	0	0
KY21.Chr1.1367	KH.L18.66		1.4567	1.2242	KDM6A: lysine demethylase 6A	1.34302	1.34713	3.90525	1.85409	1.34302	1.34713	3.90525	1.85409	5.83167	4.00314	4.81707	4.00314
KY21.Chr1.1368	KH.L18.127		0.1606	0.6477	FSIP2: fibrous sheath interacting protein 2	1	1	1	1	0.0674473	0.0352381	0.105595	0.0922579	0.0106327	0.0662043	0.0431259	0.0662043
KY21.Chr1.1369	KH.L18.3		0.5586	0.9716		1	1	1	1	0.62723	0.970959	0.886512	0.834125	0.549332	0.983363	0.33421	0.983363
KY21.Chr1.137	KH.L144.4		1.7894	1.8836		13.2471	12.2559	8.16137	18.8751	13.2471	12.2559	8.16137	18.8751	9.25735	5.17335	23.994	5.17335
KY21.Chr1.1370	0		0.6424	0.0485		1.29946	1.65374	2.64082	2.22183	1.29946	1.65374	2.64082	2.22183	0.393948	0.613225	0.0798917	0.613225
KY21.Chr1.1371	KH.L18.142		0.9041	1.2273		1.32281	1	1.2051	1.48185	1.32281	0.675222	1.2051	1.48185	0.683133	0.755556	0.874975	0.755556
KY21.Chr1.1372	KH.L18.104		0.9938	0.8661		20.761	30.2392	22.0997	34.0991	20.761	30.2392	22.0997	34.0991	24.8937	25.0484	25.1916	25.0484
KY21.Chr1.1373	KH.L18.110		0.8379	1.2273		1	1	1	1.16901	0.709027	0.749687	0.743332	1.16901	1.19759	1.4292	1.94294	1.4292
KY21.Chr1.1374	KH.L18.42		0.6424	#NUM!		1	1	1	1	0.00807511	0.00703145	0.0316057	0.0138069	0.019095	0.0297236	0	0.0297236
KY21.Chr1.1375	KH.L18.89		7.1465	3.4404	ADGRG4: adhesion G protein-coupled receptor G4	1	1	1	1	0.59838	0.527556	0.71725	0.588294	6.59144	0.922328	2.07444	0.922328
KY21.Chr1.1376	KH.L18.79		0.4786	0.9716		1	1.12805	1	1	0.910337	1.12805	0.993537	0.927918	0.524365	1.09547	0.447747	1.09547
KY21.Chr1.1377	KH.L18.39		1.6229	0.8221	MIB2: mindbomb E3 ubiquitin protein ligase 2	1	1	1	1.01357	0.151999	0.132354	0.832887	1.01357	0.575086	0.354345	0.534536	0.354345
KY21.Chr1.1378	KH.L18.39		2.4049	2.9537	MIB2: mindbomb E3 ubiquitin protein ligase 2	2.26076	1.90789	2.32577	2.36959	2.26076	1.90789	2.32577	2.36959	7.57345	3.1491	6.60266	3.1491
KY21.Chr1.1379	KH.L18.19		#NUM!	#NUM!	OIT3: oncoprotein induced transcript 3	1	1	1	1	0.0171311	0.0596679	0.0838129	0	0	0	0	0
KY21.Chr2.219	KH.C2.200	TaGup	#NUM!	0		1	1.78183	1.75959	3.18073	0.992148	1.78183	1.75959	3.18073	0	0	0	0
KY21.Chr1.1380	KH.L18.60		0	0.0021	UMOD: uromodulin	6.12413	5.56985	5.20424	5.25581	6.12413	5.56985	5.20424	5.25581	0	7.97191	0.0189351	7.97191
KY21.Chr1.1381	KH.L18.140		0.5436	0.6279	PARL: presenilin associated rhomboid like	27.2785	27.1813	24.7562	30.5519	27.2785	27.1813	24.7562	30.5519	13.5276	24.8827	15.102	24.8827
KY21.Chr1.1382	SPKH.L18.10061		5.6687	4.157		4.4214	6.92318	4.70581	6.03456	4.4214	6.92318	4.70581	6.03456	33.7196	5.94836	25.7286	5.94836
KY21.Chr1.1383	0		#NUM!	#NUM!		1	1	1	1	0	0	0	0	0	0	0	0
KY21.Chr1.1384	KH.L18.96		1.3185	2.5949	KIAA0100: KIAA0100	1	1	1	1	0.402224	0.304413	0.989449	0.520617	1.50818	1.14385	1.36403	1.14385
KY21.Chr1.1385	KH.L18.69		0.6535	0.9602	LAP3: leucine aminopeptidase 3	3.96084	3.84535	6.37032	5.72143	3.96084	3.84535	6.37032	5.72143	5.27517	8.07175	6.11309	8.07175
KY21.Chr1.1386	KH.L18.86		0.4504	0.4043	PIN4: peptidylprolyl cis/trans isomerase, NIMA-interacting 4	31.1633	30.6397	23.7221	33.6063	31.1633	30.6397	23.7221	33.6063	10.2123	22.6708	14.3168	22.6708
KY21.Chr1.1387	KH.L18.75		0.5877	0.47	XXYLT1: xyloside xylosyltransferase 1	27.4814	27.2838	26.9156	32.3568	27.4814	27.2838	26.9156	32.3568	22.6804	38.5877	18.8238	38.5877
KY21.Chr1.1388	KH.L18.53		0.8101	0.9089	TPRA1: transmembrane protein adipocyte associated 1	3.8324	3.28872	3.80432	4.17853	3.8324	3.28872	3.80432	4.17853	2.8019	3.45852	2.57474	3.45852
KY21.Chr1.1389	KH.L18.37		0.7937	0.5945		2.10035	1.98694	1.24325	1	2.10035	1.98694	1.24325	0.487695	2.41179	3.03838	3.62683	3.03838
KY21.Chr1.139	SPKH.L144.10010		0.5327	0.4858		3.36922	2.79407	1.56988	2.12599	3.36922	2.79407	1.56988	2.12599	1.07493	2.01774	1.28231	2.01774
KY21.Chr1.1390	KH.L18.126		#NUM!	#NUM!		1	1	1	1	0	0	0	0	0	0	0	0
KY21.Chr1.1391	KH.S256.15		0.5791	0.6422		2835.88	2640.4	2692.75	3449.8	2835.88	2640.4	2692.75	3449.8	943.313	1628.67	1418.96	1628.67
KY21.Chr1.1392	KH.S256.15		0.6023	0.5393		738.981	700.952	662.469	862.033	738.981	700.952	662.469	862.033	229.67	381.269	319.678	381.269
KY21.Chr2.1069	KH.C2.320	TaGup	22.0579	49.4109	ASNS: asparagine synthetase (glutamine-hydrolyzing)	15.6972	100.066	5.74624	66.7059	15.6972	100.066	5.74624	66.7059	25.799	1.1696	65.0437	1.1696
KY21.Chr1.1394	KH.L18.80		1.7131	1.7666		3.35811	4.67854	3.48808	5.7859	3.35811	4.67854	3.48808	5.7859	1.79178	1.04592	3.30335	1.04592
KY21.Chr1.1395	KH.L18.87		0.6795	0.6586		14.9547	13.1054	13.9087	14.7418	14.9547	13.1054	13.9087	14.7418	9.98332	14.6909	9.47658	14.6909
KY21.Chr1.1396	KH.L18.51		1.065	1.6952		5.59864	4.77348	4.22279	5.18518	5.59864	4.77348	4.22279	5.18518	5.79205	5.43822	7.64431	5.43822
KY21.Chr1.1397	KH.L18.2		0.6607	0.9716	MDH1B: malate dehydrogenase 1B	1	1	1.10215	1.84987	0.326056	0.232294	1.10215	1.84987	0.210278	0.318229	0.355365	0.318229
KY21.Chr1.1398	0		2.5696	#NUM!		1	1	1	1	0.565162	0.688965	0.442405	0.579793	0.35638	0.138687	0.180683	0.138687
KY21.Chr1.1399	KH.L18.73		1.5589	1.2475		2.96035	3.15058	3.21853	2.53083	2.96035	3.15058	3.21853	2.53083	3.37051	2.16205	3.90589	2.16205
KY21.Chr1.14	KH.L60.13		1.3226	0.3721		1.5362	1.17714	1	1	1.5362	1.17714	0.0601264	0.21013	1.69522	1.28171	0.884025	1.28171
KY21.Chr1.140	KH.L144.9		0.1004	0.149	COMT: catechol-O-methyltransferase	28.3177	26.64	18.9773	27.3227	28.3177	26.64	18.9773	27.3227	1.7225	17.149	3.7843	17.149
KY21.Chr1.1400	KH.L18.21		0.2055	0.2363	TTLL8: tubulin tyrosine ligase like 8	1	1	1	1	0.399319	0.373466	0.426909	0.354025	0.186521	0.907316	0.212771	0.907316
KY21.Chr1.1401	KH.L18.15		0.6705	0.5422	GNL3L: G protein nucleolar 3 like	20.9352	19.619	17.5339	22.4761	20.9352	19.619	17.5339	22.4761	18.9108	28.2006	17.4458	28.2006
KY21.Chr1.1402	KH.L18.10		0.33	0.5091	THSD7A: thrombospondin type 1 domain containing 7A	1	1	2.71435	1.13442	0.732112	0.62753	2.71435	1.13442	1.51481	4.58963	1.39885	4.58963
KY21.Chr1.1403	KH.L18.109		0.3072	0.0903		1	1	1	1	0.18863	0.131401	0.184573	0.169324	0.0817758	0.266159	0.0301526	0.266159
KY21.Chr1.1404	KH.L18.91		0	0.0037	GUCY2F: guanylate cyclase 2F, retinal	2.22716	1.32294	2.39888	2.1697	2.22716	1.32294	2.39888	2.1697	0	5.03104	0.0137989	5.03104
KY21.Chr1.1405	KH.L18.6		0.6825	0.9005	TRIM2: tripartite motif containing 2	1	1	1	1	0.35391	0.53416	0.230865	0.403414	0.316156	0.463184	0.716586	0.463184
KY21.Chr1.1406	KH.L18.114		0.6624	0.8928	CHDH: choline dehydrogenase	8.49407	7.45714	6.85774	8.36733	8.49407	7.45714	6.85774	8.36733	6.39217	9.64993	7.12415	9.64993
KY21.Chr1.1407	KH.L18.94		0.6307	0.6345	CPTP: ceramide-1-phosphate transfer protein	6.04479	7.00556	5.3254	6.47346	6.04479	7.00556	5.3254	6.47346	3.67947	5.83309	4.95166	5.83309
KY21.Chr1.1408	KH.L18.81		1.4499	1.3657	KLC1: kinesin light chain 1	45.5052	41.4116	41.3892	41.4273	45.5052	41.4116	41.3892	41.4273	89.5379	61.7512	76.6514	61.7512
KY21.Chr1.1409	KH.L18.97		1.0939	1.1994	SAP130: Sin3A associated protein 130	5.2702	4.21234	6.12856	3.91712	5.2702	4.21234	6.12856	3.91712	7.28519	6.65937	7.03345	6.65937
KY21.Chr1.141	KH.L144.7		0.7214	0.6714	PDZD8: PDZ domain containing 8	4.13111	3.71385	4.08596	3.03537	4.13111	3.71385	4.08596	3.03537	2.5698	3.56181	2.87345	3.56181
KY21.Chr1.1410	KH.L18.85		0.7825	0.6911		9.40095	11.685	9.50538	11.5511	9.40095	11.685	9.50538	11.5511	9.98181	12.7559	8.45662	12.7559
KY21.Chr1.1411	KH.L18.32		0.997	1.2382	PTPN11: protein tyrosine phosphatase, non-receptor type 11	6.25543	5.82386	7.76041	8.65438	6.25543	5.82386	7.76041	8.65438	6.55958	6.57873	8.60433	6.57873
KY21.Chr1.1412	KH.L18.82		1.3892	2.2385	SLC13A3: solute carrier family 13 member 3	1.49375	1.28502	1	1.24625	1.49375	1.28502	0.669177	1.24625	3.7734	2.71605	2.61791	2.71605
KY21.Chr1.1413	KH.L18.82		1.2848	0		1	1	1	1	0	0.275914	0.620104	0	0.249763	0.194392	0	0.194392
KY21.Chr1.1414	KH.L18.103		0.6592	0.8785	SGPP2: sphingosine-1-phosphate phosphatase 2	27.614	28.3627	20.2651	25.2234	27.614	28.3627	20.2651	25.2234	15.2665	23.159	19.4212	23.159
KY21.Chr1.1415	KH.L18.129		1.606	2.6863	ARF6: ADP ribosylation factor 6	1	1	1	1	0.590283	0.321245	0.505389	0.67285	0.678529	0.422483	0.923912	0.422483
KY21.Chr1.1416	KH.L18.124		0.6959	0.6642	ZNF705B: zinc finger protein 705B	2.23839	1.91365	4.56964	2.62687	2.23839	1.91365	4.56964	2.62687	4.48307	6.4416	3.39103	6.4416
KY21.Chr1.1417	KH.L18.20		1.2494	1.3433	ARAF: A-Raf proto-oncogene, serine/threonine kinase	3.35191	3.28353	5.2887	4.24821	3.35191	3.28353	5.2887	4.24821	5.13221	4.10753	5.08344	4.10753
KY21.Chr1.1418	KH.L18.132		0.2805	0.4354	TMPRSS9: transmembrane protease, serine 9	1	1	1.60203	1	0.729127	0.786165	1.60203	0.891122	0.39421	1.4049	0.454423	1.4049
KY21.Chr1.1419	KH.L18.130		#NUM!	#NUM!		1	1	1	1	0	0	0	0	0	0	0	0
KY21.Chr1.142	KH.L144.6		0.5509	0.5113	NUP50: nucleoporin 50	6.7372	6.29571	4.46989	6.93971	6.7372	6.29571	4.46989	6.93971	3.54892	6.44166	3.54603	6.44166
KY21.Chr1.1420	KH.L18.136		0	#NUM!		1	1	1	1	0.389591	0	0	0	0	0.239007	0.155691	0.239007
KY21.Chr1.1421	KH.L18.46		0.6424	0.694	FBF1: Fas binding factor 1	1	1	1	1	0.961156	0.869753	0.700752	0.668638	0.453079	0.70527	0.564857	0.70527
KY21.Chr1.1422	KH.L18.122		0.3263	0.2422	POLE3: DNA polymerase epsilon 3, accessory subunit	79.0491	94.9633	94.0899	111.225	79.0491	94.9633	94.0899	111.225	28.6302	87.7292	25.9594	87.7292
KY21.Chr1.1423	KH.L18.71		0.3224	0.2765	RPUSD4: RNA pseudouridylate synthase domain containing 4	8.69605	9.86541	8.97092	10.1744	8.69605	9.86541	8.97092	10.1744	3.93641	12.2092	3.59431	12.2092
KY21.Chr1.1424	KH.L18.43		2.9551	2.2672	VWF: von Willebrand factor	1	1	1	1	0.0515441	0.0448823	0.151306	0.0330491	0.233613	0.0790534	0.216283	0.0790534
KY21.Chr1.1425	SPKH.L18.10003		3.7192	#NUM!	OTOGL: otogelin like	1	1	1	1	0.0128382	0.00838418	0.74116	0.0548772	0.139141	0.0374109	0.033348	0.0374109
KY21.Chr1.1426	SPKH.S1797.10001		#NUM!	#NUM!		1	1	7.29534	1	0	0	7.29534	0.265581	0.489732	0	0.993163	0
KY21.Chr1.1427	KH.L18.119		1.1117	1.1559	PPFIA1: PTPRF interacting protein alpha 1	2.18117	1.64656	1.91684	1.79104	2.18117	1.64656	1.91684	1.79104	3.35273	3.01562	2.66026	3.01562
KY21.Chr1.1428	SPKH.L18.10009		#NUM!	#NUM!		1	1	1	1	0	0	0	0	0	0	0	0
KY21.Chr1.1429	KH.L18.17		0.4844	0.3853	B3GALT1: beta-1,3-galactosyltransferase 1	1	1	1	1	0.708296	0.75602	0.435958	0.31253	0.20711	0.427519	0.210007	0.427519
KY21.Chr1.143	KH.L144.2		0.4361	0.3311	PHF21A: PHD finger protein 21A	1.82808	1.78019	2.09571	1.45187	1.82808	1.78019	2.09571	1.45187	1.25336	2.87342	0.916427	2.87342
KY21.Chr1.1430	KH.L18.118		1.1238	1.3205	TMEM241: transmembrane protein 241	18.779	16.8294	17.1009	20.0386	18.779	16.8294	17.1009	20.0386	21.1227	18.7945	25.0883	18.7945
KY21.Chr1.1431	KH.L18.63		0.4108	0.4357	CYB5R3: cytochrome b5 reductase 3	37.7039	40.8121	29.6083	40.0008	37.7039	40.8121	29.6083	40.0008	18.5824	45.23	21.6894	45.23
KY21.Chr1.1432	KH.L18.78		0.8176	0.6782	NF2: neurofibromin 2	5.85076	5.48648	5.2271	5.85502	5.85076	5.48648	5.2271	5.85502	5.39834	6.60246	3.83169	6.60246
KY21.Chr1.1433	KH.L18.11		0.9636	0.5979	RBKS: ribokinase	3.89865	4.26771	4.35977	5.80891	3.89865	4.26771	4.35977	5.80891	2.05453	2.13208	1.85179	2.13208
KY21.Chr1.1434	KH.L18.123		0.5743	0.6047	EXD2: exonuclease 3'-5' domain containing 2	2.99874	2.5637	2.40075	2.7501	2.99874	2.5637	2.40075	2.7501	2.08434	3.62918	1.93919	3.62918
KY21.Chr1.1435	KH.L18.120		0.4795	0.3332	TRIT1: tRNA isopentenyltransferase 1	3.38502	4.14115	3.06585	4.28102	3.38502	4.14115	3.06585	4.28102	1.78612	3.72423	2.39245	3.72423
KY21.Chr1.1436	KH.L18.61		0.4407	0.444	AC241556.4	22.5694	19.3207	15.8345	16.689	22.5694	19.3207	15.8345	16.689	10.2029	23.1463	12.5733	23.1463
KY21.Chr1.1437	KH.L18.84		2.4025	2.9666	FURIN: furin, paired basic amino acid cleaving enzyme	2.9805	2.9197	6.25282	3.44818	2.9805	2.9197	6.25282	3.44818	16.0557	6.68291	18.2029	6.68291
KY21.Chr1.1438	KH.L18.64	TaGdown	2.7133	2.9239		1.9412	1.22932	4.54717	2.61505	1.9412	1.22932	4.54717	2.61505	15.7648	5.81012	15.28	5.81012
KY21.Chr1.1439	KH.L18.137		0.9636	0.9716		1	1	1	1	0.482539	0.280116	0.157387	0.412526	0.38035	0.394705	1.28557	0.394705
KY21.Chr1.144	KH.L144.10		0.6424	0.9716	TSSK1B: testis specific serine kinase 1B	1	1	1	1	0.0234543	0.020423	0.0229498	0	0.0184873	0.0287776	0.112475	0.0287776
KY21.Chr1.1440	KH.L18.8		0.6896	0.5894	FURIN: furin, paired basic amino acid cleaving enzyme	9.29411	6.97608	10.2037	10.1386	9.29411	6.97608	10.2037	10.1386	5.56766	8.07371	6.00209	8.07371
KY21.Chr1.1441	KH.L18.33		1.0979	1.1391	ZNF420: zinc finger protein 420	11.5201	11.8736	11.8091	9.84859	11.5201	11.8736	11.8091	9.84859	11.6131	10.577	12.7777	10.577
KY21.Chr1.1442	KH.L18.117		0.3487	0.6253	ACP6: acid phosphatase 6, lysophosphatidic	3.60819	3.95641	2.92036	3.57974	3.60819	3.95641	2.92036	3.57974	1.33425	3.82591	2.3142	3.82591
KY21.Chr1.1443	0		#NUM!	#NUM!		1	1	1	1	0	0	0	0	0	0	0	0
KY21.Chr1.1444	KH.L18.12		0.1724	0.1142	SLC6A8: solute carrier family 6 member 8	16.7528	14.2536	15.097	14.5971	16.7528	14.2536	15.097	14.5971	0.887483	5.14635	0.801007	5.14635
KY21.Chr1.1445	KH.L18.134		1.2848	1.5546	ADPRHL1: ADP-ribosylhydrolase like 1	1	1	1	1	0.251292	0.343851	0.983549	0.767255	0.509336	0.39642	0.459076	0.39642
KY21.Chr1.1446	KH.L18.22		3.0006	3.8918	HSD17B6: hydroxysteroid 17-beta dehydrogenase 6	29.1803	31.5359	28.1139	37.2133	29.1803	31.5359	28.1139	37.2133	80.0674	26.6831	82.8138	26.6831
KY21.Chr1.1447	SPKH.L18.10037		#NUM!	#NUM!		1	1	1	1	0	0	0	0	0	0	0	0
KY21.Chr1.1448	KH.L18.49		0.9234	1.5546		1	1	1	1	0.0960204	0.0418052	0.0939551	0.0820885	0.870387	0.942509	0.306978	0.942509
KY21.Chr1.1449	KH.L18.45		2.425	3.2734		1.06889	1.24099	1.0459	1.27933	1.06889	1.24099	1.0459	1.27933	32.0161	13.2024	19.7631	13.2024
KY21.Chr1.145	KH.L144.12		0.0215	0.011	SSPO: SCO-spondin	1	1	1.94637	1	0.306688	0.321588	1.94637	0.432059	0.0238334	1.10768	0.0138096	1.10768
KY21.Chr1.1450	KH.L18.9		0.7401	0.6992	ZNF16: zinc finger protein 16	2.35007	2.32405	1.75749	2.87013	2.35007	2.32405	1.75749	2.87013	2.35517	3.18209	2.06612	3.18209
KY21.Chr1.1451	KH.L18.27		5.0775	6.6852	B3GALNT1: beta-1,3-N-acetylgalactosaminyltransferase 1 (globoside blood group)	7.05068	6.01602	7.45373	8.87492	7.05068	6.01602	7.45373	8.87492	22.9562	4.52109	32.5373	4.52109
KY21.Chr1.1452	KH.L18.138		0.8822	0.9974	TDRD9: tudor domain containing 9	1.20431	1.58173	1	1	1.20431	1.58173	0.540103	0.643483	2.80825	3.18309	1.86092	3.18309
KY21.Chr1.1453	KH.L18.111		0.7262	0.3447		1.06399	1	1	1	1.06399	0.912646	0.419549	0.58378	0.162726	0.224074	0.139617	0.224074
KY21.Chr1.1454	KH.L18.102		0.5756	0.5251	FNTA: farnesyltransferase, CAAX box, alpha	27.4005	28.8493	23.3065	31.0495	27.4005	28.8493	23.3065	31.0495	21.2873	36.9814	20.2682	36.9814
KY21.Chr1.1455	KH.L18.57		0.6232	0.5751		16.9692	13.6776	12.065	14.6115	16.9692	13.6776	12.065	14.6115	13.0548	20.9455	9.95247	20.9455
KY21.Chr1.1456	KH.L18.50		0.591	0.5159	GTF2F2: general transcription factor IIF subunit 2	9.32764	9.2223	7.96342	9.72162	9.32764	9.2223	7.96342	9.72162	7.58663	12.8354	7.63334	12.8354
KY21.Chr1.1457	KH.L18.50		0.8895	0.7773	HASPIN: histone H3 associated protein kinase	2.48825	2.67265	2.14315	2.35651	2.48825	2.67265	2.14315	2.35651	3.06527	3.44605	2.57226	3.44605
KY21.Chr1.1458	KH.L18.38		0.3877	0.3921		21.9864	22.9817	23.2651	28.5673	21.9864	22.9817	23.2651	28.5673	12.2289	31.5383	14.8212	31.5383
KY21.Chr1.1459	KH.L18.65		1.1522	1.1549	PDE11A: phosphodiesterase 11A	9.96759	8.61451	8.59577	9.9357	9.96759	8.61451	8.59577	9.9357	19.6059	17.0153	17.6257	17.0153
KY21.Chr1.146	KH.L144.15		#NUM!	#NUM!		1	1	1	1	0	0	0	0.0613804	0	0	0	0
KY21.Chr1.1460	KH.L18.113		0.6552	0.673	PQLC2: PQ loop repeat containing 2	8.70313	7.89851	7.47643	8.5407	8.70313	7.89851	7.47643	8.5407	5.7489	8.77335	6.51511	8.77335
KY21.Chr1.1461	KH.L18.34		0.803	1.146		5.95989	8.64934	6.22048	5.7745	5.95989	8.64934	6.22048	5.7745	5.4807	6.82506	3.65198	6.82506
KY21.Chr1.1462	KH.L18.5		0.4987	0.4271		31.6673	34.2269	20.258	27.4216	31.6673	34.2269	20.258	27.4216	11.1704	22.3969	11.886	22.3969
KY21.Chr1.1463	KH.L18.29		#NUM!	#NUM!		4.42522	3.06836	7.69784	7.35612	4.42522	3.06836	7.69784	7.35612	0	0	0	0
KY21.Chr1.1464	KH.L18.74		1.1887	2.6817	EFHC2: EF-hand domain containing 2	1	1	1	1	0.606062	0.398288	0.358054	0.459471	0.892333	0.750631	0.630628	0.750631
KY21.Chr1.1465	KH.L18.31		0.0755	0	KLHL24: kelch like family member 24	1	1	1	1	0.0709934	0.154545	0.266288	0.171963	0.018653	0.246801	0	0.246801
KY21.Chr1.1466	KH.L18.55		#NUM!	#NUM!		1	1	1	1	0	0	0	0.0473864	0	0	0.132904	0
KY21.Chr1.1467	KH.L18.30		0.1207	0.3091		8.58578	9.1696	10.9539	10.2598	8.58578	9.1696	10.9539	10.2598	0.523456	4.336	1.06155	4.336
KY21.Chr1.1468	KH.L18.116		12.2393	11.426	FAM124A: family with sequence similarity 124 member A	4.3895	5.87263	5.3465	5.82438	4.3895	5.87263	5.3465	5.82438	49.6102	4.05335	40.1812	4.05335
KY21.Chr1.1469	KH.L18.92		0.2649	0.3302	MYO7A: myosin VIIA	8.90855	8.05552	7.87877	7.85398	8.90855	8.05552	7.87877	7.85398	1.78925	6.75272	3.85105	6.75272
KY21.Chr1.147	KH.L144.11		0.0577	0.0539		10.1513	13.9925	8.28414	15.7054	10.1513	13.9925	8.28414	15.7054	0.259158	4.48792	0.197087	4.48792
KY21.Chr1.1470	KH.L18.88		1.1832	1.4035	CUL3: cullin 3	13.9077	11.7659	9.07604	12.1892	13.9077	11.7659	9.07604	12.1892	18.4695	15.6087	16.6962	15.6087
KY21.Chr1.1471	KH.L18.25		0.8848	1.2899	CTRB1: chymotrypsinogen B1	1.54433	1	1.766	1.84518	1.54433	0.858687	1.766	1.84518	1.07062	1.20996	1.14508	1.20996
KY21.Chr1.1472	KH.L18.1		1.0028	0.4759		1	1	1	1	0.270904	0.707674	0.424124	0.277917	0.683308	0.681398	0.519649	0.681398
KY21.Chr1.1473	KH.L18.95		0.4496	0.6268		1.7013	1.85177	1	1	1.7013	1.85177	0.416177	0.27271	1.17338	2.60929	1.69971	2.60929
KY21.Chr1.1474	KH.L18.133		1.1624	0.2834		1.40681	2.09998	1.9665	1.03088	1.40681	2.09998	1.9665	1.03088	3.00983	2.58916	1.1244	2.58916
KY21.Chr1.1475	KH.L18.4		0.6667	0.6964	IL17RA: interleukin 17 receptor A	5.04744	4.24248	5.76203	5.33394	5.04744	4.24248	5.76203	5.33394	4.9179	7.37573	4.67852	7.37573
KY21.Chr1.1476	KH.L18.93		0.9308	0.9567	IL17RD: interleukin 17 receptor D	4.83577	4.88902	5.3669	5.24397	4.83577	4.88902	5.3669	5.24397	5.98613	6.43108	5.00634	6.43108
KY21.Chr1.1477	KH.L18.48		1.0655	0.9448	IL17RA: interleukin 17 receptor A	3.20456	3.34847	3.76277	3.15603	3.20456	3.34847	3.76277	3.15603	5.59744	5.253	5.06104	5.253
KY21.Chr1.1478	KH.L18.131		0.4835	0.5122	TRAPPC1: trafficking protein particle complex 1	59.2365	66.7685	51.3982	62.8003	59.2365	66.7685	51.3982	62.8003	28.2372	58.4	32.7071	58.4
KY21.Chr1.1479	KH.L18.77		0.7421	1.0535	SPCS2: signal peptidase complex subunit 2	65.5233	72.6411	41.1573	63.4079	65.5233	72.6411	41.1573	63.4079	51.684	69.643	65.8169	69.643
KY21.Chr1.148	KH.L144.1		1.3283	2.3798	DUOX1: dual oxidase 1	1	1	1	1	0.798333	0.762117	0.784745	0.604232	1.40863	1.0604	1.83518	1.0604
KY21.Chr1.1480	KH.L18.58		1.7984	1.5396	PRUNE2: prune homolog 2	2.48349	1.91597	5.03429	2.74558	2.48349	1.91597	5.03429	2.74558	7.65804	4.25807	7.15093	4.25807
KY21.Chr1.1481	KH.L18.47		1.1184	1.3364	PRUNE1: prune exopolyphosphatase 1	5.98476	5.21126	5.06615	6.75842	5.98476	5.21126	5.06615	6.75842	6.9334	6.19893	7.98704	6.19893
KY21.Chr1.1482	KH.L18.24		0.5586	0.34		32.8566	33.5628	3.49327	4.65569	32.8566	33.5628	3.49327	4.65569	2.38475	4.26896	2.36975	4.26896
KY21.Chr1.1483	KH.L18.24		0	0.4164		1.01008	1.17272	1	1	1.01008	1.17272	0.603997	0.575686	0	0.344261	0.134552	0.344261
KY21.Chr1.1484	KH.L18.18		1.2119	1.2698	SSR3: signal sequence receptor subunit 3	156.056	168.683	111.084	144.526	156.056	168.683	111.084	144.526	180.859	149.23	176.516	149.23
KY21.Chr1.1485	KH.L18.90		0.8787	0.9055	GPS2: G protein pathway suppressor 2	3.43047	3.71423	2.20835	3.29933	3.43047	3.71423	2.20835	3.29933	2.57946	2.93527	2.47124	2.93527
KY21.Chr1.1486	KH.L18.7		2.7572	2.7577	CHSY1: chondroitin sulfate synthase 1	3.83032	4.90992	5.25964	6.65869	3.83032	4.90992	5.25964	6.65869	14.933	5.41597	11.079	5.41597
KY21.Chr1.1487	KH.L18.115		12.2059	#NUM!		11.585	11.8381	9.5759	19.6725	11.585	11.8381	9.5759	19.6725	0.792237	0.0649057	1.60664	0.0649057
KY21.Chr1.1488	KH.L18.16		24.9138	30.8564	TMPRSS4: transmembrane protease, serine 4	108.943	101.537	103.505	130.734	108.943	101.537	103.505	130.734	26.2156	1.05225	53.0575	1.05225
KY21.Chr1.1489	KH.L18.72		13.2766	20.3076	FUT4: fucosyltransferase 4	1.21369	1.02574	1.0828	1.37328	1.21369	1.02574	1.0828	1.37328	15.7005	1.18256	11.9258	1.18256
KY21.Chr1.149	KH.L144.17		0.6947	0.6873	XIAP: X-linked inhibitor of apoptosis	3.43053	2.64827	1.83351	1.88536	3.43053	2.64827	1.83351	1.88536	3.31755	4.77507	4.20494	4.77507
KY21.Chr1.1490	SPKH.L18.10010		1.2848	#NUM!		1	1	1	1	0.0514952	0.0448398	0.100775	0.132071	0.0811798	0.0631828	0.0411576	0.0631828
KY21.Chr1.1491	0		0	#NUM!		1	1.0219	1	1	0	1.0219	0	0	0	0.143994	0	0.143994
KY21.Chr1.1492	KH.L18.26		0.6915	0.7918	HNRNPM: heterogeneous nuclear ribonucleoprotein M	13.3432	13.4559	13.147	13.875	13.3432	13.4559	13.147	13.875	11.1937	16.1867	10.8128	16.1867
KY21.Chr1.1493	KH.L2.2		#NUM!	0		1	1	1	1	0	0	0	0	0.0840011	0	0	0
KY21.Chr1.1494	SPKH.L2.10001		0	#NUM!		1	1	1	1	0	0	0.0920036	0	0	0.0576832	0	0.0576832
KY21.Chr1.1495	KH.S841.4		0.658	0.6477		1	1	1.28199	1.36898	0.80066	0.69718	1.28199	1.36898	1.20483	1.8308	2.67607	1.8308
KY21.Chr1.1496	0		#NUM!	#NUM!		1	1	1	1	0	0	0	0	0	0	0	0
KY21.Chr1.1497	KH.L18.40		0.4607	0.411	ORC2: origin recognition complex subunit 2	4.11205	3.97963	2.22995	2.74245	4.11205	3.97963	2.22995	2.74245	1.20082	2.60625	1.82147	2.60625
KY21.Chr1.1498	KH.L18.67		1.3393	2.1859	TMED9: transmembrane p24 trafficking protein 9	221.548	245.417	188.461	219.522	221.548	245.417	188.461	219.522	298.982	223.226	446.497	223.226
KY21.Chr1.1499	KH.L18.23		0.7325	0.6345	GRIK2: glutamate ionotropic receptor kainate type subunit 2	1	1	1	1	0.4647	0.30348	0.355238	0.422105	0.744024	1.01562	0.742824	1.01562
KY21.Chr1.15	KH.L60.15		0.5674	0.5979	PIK3CA: phosphatidylinositol-4,5-bisphosphate 3-kinase catalytic subunit alpha	5.21031	4.59532	6.69555	5.50578	5.21031	4.59532	6.69555	5.50578	4.00115	7.05136	4.00349	7.05136
KY21.Chr1.150	KH.L144.16		0.393	0.7972	BLOC1S1: biogenesis of lysosomal organelles complex 1 subunit 1	4.42032	3.76799	2.18539	2.74472	4.42032	3.76799	2.18539	2.74472	0.953574	2.42634	2.38009	2.42634
KY21.Chr1.1500	KH.L18.135		1.6068	2.4076	KDM8: lysine demethylase 8	35.6885	32.623	19.0386	27.2809	35.6885	32.623	19.0386	27.2809	66.3497	41.2912	85.7102	41.2912
KY21.Chr1.1501	KH.L18.13		2.0714	2.8512	KDM8: lysine demethylase 8	34.3354	34.0856	28.3385	31.4809	34.3354	34.0856	28.3385	31.4809	74.3521	35.8938	81.4588	35.8938
KY21.Chr1.1502	KH.L18.125		1.1108	1.8786		31.1482	30.1708	23.4954	30.3123	31.1482	30.1708	23.4954	30.3123	44.4868	40.0487	59.3682	40.0487
KY21.Chr1.1503	KH.L18.76		0.7078	0.7922	FAM135B: family with sequence similarity 135 member B	9.27879	8.19198	5.87033	6.76985	9.27879	8.19198	5.87033	6.76985	3.77901	5.33858	4.98074	5.33858
KY21.Chr1.1504	KH.L18.14		0.4382	0.4776	CNBP: CCHC-type zinc finger nucleic acid binding protein	38.8259	38.0829	40.8228	44.2995	38.8259	38.0829	40.8228	44.2995	21.4445	48.9269	22.5498	48.9269
KY21.Chr1.1505	KH.L18.101		0.0513	0.1372	MEGF6: multiple EGF like domains 6	1	1	2.38958	1	0.391872	0.484638	2.38958	0.835108	0.0940081	1.82918	0.177028	1.82918
KY21.Chr1.1506	KH.L18.56		0.3381	0		1	1.1281	1	2.63047	0.809712	1.1281	0.316919	2.63047	0.638236	1.88763	0	1.88763
KY21.Chr1.1507	KH.L18.52		0.7034	0.7078	ENGASE: endo-beta-N-acetylglucosaminidase	3.47047	3.16583	3.28032	3.33023	3.47047	3.16583	3.28032	3.33023	2.25168	3.20085	2.00014	3.20085
KY21.Chr1.1508	KH.L18.107		1.1795	1.033	SSR4: signal sequence receptor subunit 4	110.762	116.885	82.1829	108.706	110.762	116.885	82.1829	108.706	128.252	108.734	120.304	108.734
KY21.Chr1.1509	KH.L18.70		0.3458	0.4291		5.83014	7.81297	5.9475	6.71633	5.83014	7.81297	5.9475	6.71633	4.00881	11.5925	4.75889	11.5925
KY21.Chr1.151	KH.C1.816		0.7592	0.9716		1	1	1	1	0.0945637	0.041171	0.0693974	0.171792	0.121124	0.159536	0.0850277	0.159536
KY21.Chr1.1510	KH.L18.83		0.4441	0.5018	CYP26B1: cytochrome P450 family 26 subfamily B member 1	4.35021	4.05298	4.53692	4.3006	4.35021	4.05298	4.53692	4.3006	2.49763	5.6231	2.2464	5.6231
KY21.Chr1.1511	KH.L18.99		#NUM!	#NUM!		1	1	1	1	0	0	0	0	0	0	0	0
KY21.Chr1.1512	KH.L18.105		0.2941	0.2477	OSGEP: O-sialoglycoprotein endopeptidase	20.2109	21.2122	17.8211	22.6656	20.2109	21.2122	17.8211	22.6656	6.42075	21.8279	6.3263	21.8279
KY21.Chr1.1513	KH.L18.36		0.6211	0.7901	ZFYVE21: zinc finger FYVE-type containing 21	7.83808	7.04345	7.85356	7.39772	7.83808	7.04345	7.85356	7.39772	5.04139	8.11678	7.41728	8.11678
KY21.Chr1.1514	KH.L18.62		0.4521	0.4018	CSE1L: chromosome segregation 1 like	9.09834	8.67571	6.7232	7.98225	9.09834	8.67571	6.7232	7.98225	3.95807	8.75376	3.23459	8.75376
KY21.Chr1.1515	KH.L18.106		8.5065	11.9375		1	1	1	1	0.458932	0.386297	0.613717	0.523126	2.31515	0.272162	2.103	0.272162
KY21.Chr1.1516	KH.C1.642		0.6182	0.5426	COL12A1: collagen type XII alpha 1 chain	1	1	1	1	0.0780782	0.0828592	0.701914	0.0959526	0.123087	0.199083	0.0838555	0.199083
KY21.Chr1.1517	KH.C1.1173		1.2848	0.9716		1	1	1	1	0.12098	0.105344	0.0887836	0.0517134	0.1192	0.092774	0.0725202	0.092774
KY21.Chr1.1518	KH.C1.1102		0.3973	0.3297	UTP23: UTP23, small subunit processome component	8.78673	9.60836	12.3967	12.8924	8.78673	9.60836	12.3967	12.8924	5.25082	13.213	6.14088	13.213
KY21.Chr1.1519	KH.C1.958		0.9437	1.0344	CSPP1: centrosome and spindle pole associated protein 1	1	1.06927	1.12446	1.09472	0.925911	1.06927	1.12446	1.09472	1.28884	1.36569	1.29637	1.36569
KY21.Chr1.152	KH.C1.512		#NUM!	#NUM!		1	1	1	1	0	0	0	0.0298998	0	0	0	0
KY21.Chr1.1520	KH.C1.1136		0.3319	0.3497	C3orf38: chromosome 3 open reading frame 38	6.8379	6.18764	7.28119	9.16983	6.8379	6.18764	7.28119	9.16983	2.85343	8.59549	3.85779	8.59549
KY21.Chr1.1521	KH.C1.985		1.6318	1.7013	BCR: BCR, RhoGEF and GTPase activating protein	10.2226	8.25284	9.80875	9.78169	10.2226	8.25284	9.80875	9.78169	12.7351	7.80419	11.0699	7.80419
KY21.Chr1.1522	KH.C1.1019		3.212	0.4858		1	1	1	1	0.0661979	0.0864633	0.113355	0.0565931	0.0652237	0.0203056	0.0264544	0.0203056
KY21.Chr1.1523	KH.C1.349		1.1714	1.376	HBS1L: HBS1 like translational GTPase	12.8366	11.2207	12.5767	12.2735	12.8366	11.2207	12.5767	12.2735	21.6687	18.4967	21.9718	18.4967
KY21.Chr1.1524	KH.C1.518		0.3212	0.9716		1	1	1	1	0.597863	0.780889	0	0	0.235626	0.733556	2.38921	0.733556
KY21.Chr1.1525	KH.C1.1257		0.2663	0.3846	MRPS6: mitochondrial ribosomal protein S6	37.9897	46.2518	27.7533	37.4742	37.9897	46.2518	27.7533	37.4742	7.72324	29.0007	10.4417	29.0007
KY21.Chr1.1526	KH.C1.173		1.1061	1.4599	TBL2: transducin beta like 2	13.9867	12.6101	13.7666	14.6028	13.9867	12.6101	13.7666	14.6028	20.9437	18.933	19.7197	18.933
KY21.Chr1.1527	KH.C1.760		0.5723	0.6776	FAM96A: family with sequence similarity 96 member A	7.12824	9.8868	8.17063	14.1468	7.12824	9.8868	8.17063	14.1468	3.77253	6.59081	5.53448	6.59081
KY21.Chr1.1528	KH.C1.697		27.8917	45.0202	FGF4: fibroblast growth factor 4	1	1	1	1	0.441576	0.374892	0.604909	0.396382	4.5335	0.162539	3.67929	0.162539
KY21.Chr1.1529	KH.C1.211		0.6354	0.9633	STX12: syntaxin 12	7.5361	5.56482	4.6844	5.48312	7.5361	5.56482	4.6844	5.48312	3.28604	5.17131	4.2657	5.17131
KY21.Chr1.153	KH.C1.512		0	#NUM!		1	1	1	1	0.0182352	0	0.017843	0.0467683	0	0.011187	0	0.011187
KY21.Chr1.1530	KH.C1.947		0.6607	0.7653	NAPG: NSF attachment protein gamma	32.6769	30.381	25.3627	27.139	32.6769	30.381	25.3627	27.139	21.5329	32.5893	23.1376	32.5893
KY21.Chr1.1531	KH.C1.918		1.0772	1.1389	STX7: syntaxin 7	25.0196	24.1438	23.3157	26.6365	25.0196	24.1438	23.3157	26.6365	32.0433	29.7458	28.6825	29.7458
KY21.Chr1.1532	KH.C1.250		0.2091	0.2519		1	1	1	1	0.119648	0.243096	0.117074	0.102288	0.110028	0.526046	0.111567	0.526046
KY21.Chr1.1533	KH.C1.314		2.7302	2.3728	RGS19: regulator of G protein signaling 19	7.64265	8.27742	9.3756	9.33972	7.64265	8.27742	9.3756	9.33972	29.6584	10.8628	27.1022	10.8628
KY21.Chr1.1534	KH.C1.611		0.2656	0.2312	TSTA3: tissue specific transplantation antigen P35B	130.921	72.0486	75.8214	75.667	130.921	72.0486	75.8214	75.667	19.7946	74.5194	24.5439	74.5194
KY21.Chr1.1535	KH.C1.1286		0.669	0.7829	CFAP52: cilia and flagella associated protein 52	1.12026	1.36053	1.12501	1.48699	1.12026	1.36053	1.12501	1.48699	1.02244	1.52825	0.97784	1.52825
KY21.Chr1.1536	KH.C1.599		1.6844	1.4139		2.23801	1.70407	3.02458	2.96002	2.23801	1.70407	3.02458	2.96002	11.1697	6.63093	9.25649	6.63093
KY21.Chr1.1537	SPKH.C1.10017		0.107	0		1.12497	1.16325	1	1	1.12497	1.16325	0.343993	0.360655	0.0554208	0.517613	0	0.517613
KY21.Chr1.1538	KH.C1.1271		0.7709	0	TFAP2E: transcription factor AP-2 epsilon	1	1	1	1	0.092501	0.0536972	0	0.0527199	0.0729117	0.0945795	0	0.0945795
KY21.Chr1.1539	KH.C1.825		2.2156	1.5905	RXFP1: relaxin/insulin like family peptide receptor 1	7.67885	5.58915	7.12837	6.53104	7.67885	5.58915	7.12837	6.53104	18.8409	8.50366	15.6108	8.50366
KY21.Chr1.154	0		#NUM!	#NUM!		1	1	1	1	0	0	0	0	0	0	0	0
KY21.Chr1.1540	KH.C1.1294	TaGdown	2.038	1.4795		2.87832	1.71484	3.40934	2.26643	2.87832	1.71484	3.40934	2.26643	5.4928	2.69516	4.05614	2.69516
KY21.Chr1.1541	KH.C1.1168		0.6083	0.523	NOL10: nucleolar protein 10	7.8921	6.51149	5.74256	8.58803	7.8921	6.51149	5.74256	8.58803	7.06947	11.6214	6.11864	11.6214
KY21.Chr1.1542	KH.C1.338		0.5799	0.8089	ARMC1: armadillo repeat containing 1	46.3571	43.5306	44.8104	54.8846	46.3571	43.5306	44.8104	54.8846	20.7832	35.8379	24.0317	35.8379
KY21.Chr1.1543	KH.C1.214		0.0988	0.4048	NLRP3: NLR family pyrin domain containing 3	1	1	1	1	0.0719744	0.0626721	0.316919	0.261509	0.014183	0.143504	0.0719071	0.143504
KY21.Chr1.1544	KH.C1.899		0.8895	0.4251	PPP1R42: protein phosphatase 1 regulatory subunit 42	1	1	1	1	0.322583	0.11827	0.265806	0.304808	0.120443	0.135405	0.0949882	0.135405
KY21.Chr1.1545	KH.C1.164		0.8626	1.2155	MCPH1: microcephalin 1	2.57949	1.81963	2.01282	2.36341	2.57949	1.81963	2.01282	2.36341	3.24286	3.7592	2.81847	3.7592
KY21.Chr1.1546	KH.C1.804		0.3303	1.6657		5.49789	7.41262	1.9089	1.66781	5.49789	7.41262	1.9089	1.66781	1.25814	3.80806	1.70098	3.80806
KY21.Chr1.1547	SPKH.C1.10114		0.2867	0.3972		68.5455	56.95	86.2893	100.073	68.5455	56.95	86.2893	100.073	3.8703	13.495	11.6163	13.495
KY21.Chr1.1548	SPKH.C1.10219		0.2379	0.3643		1	1	1	1	0.22862	0.318516	0.536887	0.508167	0.180204	0.757373	0.109635	0.757373
KY21.Chr1.1549	KH.C1.1046		1.7384	1.2815	EPB41L1: erythrocyte membrane protein band 4.1 like 1	10.1066	8.27007	10.7094	9.5424	10.1066	8.27007	10.7094	9.5424	24.2079	13.9246	18.4544	13.9246
KY21.Chr1.155	KH.C1.1064		4.2082	3.8815	KDELC1: KDEL motif containing 1	8.42861	6.85772	6.99716	10.0586	8.42861	6.85772	6.99716	10.0586	29.686	7.05428	23.3799	7.05428
KY21.Chr1.1550	KH.C1.572		0.6208	0.7012	NDUFB8: NADH:ubiquinone oxidoreductase subunit B8	132.672	133.93	92.5914	104.805	132.672	133.93	92.5914	104.805	77.4066	124.682	82.2146	124.682
KY21.Chr1.1551	KH.C1.28		0.54	0.841		6.78319	7.32074	5.88943	5.63565	6.78319	7.32074	5.88943	5.63565	4.36772	8.08829	7.86496	8.08829
KY21.Chr1.1552	KH.C1.169		0.8565	0.7542	PAPD4: poly(A) RNA polymerase D4, non-canonical	2.3193	2.30418	2.1628	2.78122	2.3193	2.30418	2.1628	2.78122	2.40479	2.8075	2.11496	2.8075
KY21.Chr1.1553	KH.C1.182		1.0355	0.8449		124.749	137.443	100.345	119.34	124.749	137.443	100.345	119.34	92.3193	89.1476	102.319	89.1476
KY21.Chr1.1554	KH.C1.1074		1.142	1.4397	TRAF7: TNF receptor associated factor 7	5.20585	4.16045	3.82622	4.64358	5.20585	4.16045	3.82622	4.64358	4.34697	3.80618	4.23678	3.80618
KY21.Chr1.1555	KH.C1.465		0.3489	0.3869	TSN: translin	16.5825	14.7751	11.0373	15.6601	16.5825	14.7751	11.0373	15.6601	3.34369	9.58161	7.08913	9.58161
KY21.Chr1.1556	KH.C1.1026		0.6673	0.8151		7.50641	6.09684	6.66602	6.63299	7.50641	6.09684	6.66602	6.63299	5.3201	7.97177	6.30201	7.97177
KY21.Chr1.1557	KH.C1.1026		0.6424	0.5128		3.50893	5.27755	3.74559	5.4542	3.50893	5.27755	3.74559	5.4542	1.63436	2.54406	2.42209	2.54406
KY21.Chr1.1558	KH.C1.830		0.6662	1.2437	C6: complement C6	1	1	1	1	0.367947	0.188466	0.211784	0.185036	0.238845	0.358511	0.553566	0.358511
KY21.Chr1.1559	KH.C1.45		0.8703	0.6366	C6: complement C6	1	1	1	1	0.170741	0.148674	0.22972	0.136845	0.17664	0.202947	0.162052	0.202947
KY21.Chr1.156	KH.C1.1094		0.5596	1.7537	ABAT: 4-aminobutyrate aminotransferase	3.32155	2.78612	3.20538	3.95983	3.32155	2.78612	3.20538	3.95983	1.17696	2.10314	3.60461	2.10314
KY21.Chr1.1560	KH.C1.742		1.779	2.2672	C6: complement C6	1	1	1	1	0.236795	0.240556	0.167341	0.0787259	0.186648	0.104917	0.220802	0.104917
KY21.Chr1.1561	KH.C1.438		0.6616	0.7754	HNRNPH2: heterogeneous nuclear ribonucleoprotein H2	17.9676	15.0958	17.2524	19.7469	17.9676	15.0958	17.2524	19.7469	12.1404	18.3484	14.2142	18.3484
KY21.Chr1.1562	KH.C1.333		0.4838	0.4659	RPL19: ribosomal protein L19	1258.99	1534.8	949.159	1220.4	1258.99	1534.8	949.159	1220.4	498.057	1029.36	638.716	1029.36
KY21.Chr1.1563	KH.C1.986		0.8755	0.7863	LNPK: lunapark, ER junction formation factor	8.94613	7.9842	8.47581	8.53258	8.94613	7.9842	8.47581	8.53258	6.39598	7.30527	5.64234	7.30527
KY21.Chr1.1564	KH.C1.720		0.6072	0.6825	DCPS: decapping enzyme, scavenger	15.3464	12.6663	11.6714	15.3582	15.3464	12.6663	11.6714	15.3582	9.40195	15.483	9.88224	15.483
KY21.Chr1.1565	KH.C1.493		1.0278	0.5625	MEP1A: meprin A subunit alpha	1	1	1	1	0.141248	0.149349	0.157955	0.207007	0.413533	0.402319	0.0887017	0.402319
KY21.Chr1.1566	KH.C1.618		0.5606	0.3693		11.0291	11.5091	4.45379	8.00703	11.0291	11.5091	4.45379	8.00703	9.93533	17.7209	4.54743	17.7209
KY21.Chr1.1567	KH.C1.332		0.6424	0.9716	ADGRB3: adhesion G protein-coupled receptor B3	1	1	1	1	0.108392	0.207643	0.095455	0.148265	0.205051	0.319185	0.138613	0.319185
KY21.Chr1.1568	KH.C1.493		0.7008	0.9109	MEP1B: meprin A subunit beta	1	1	1	1	0.110324	0.116651	0.100241	0.0404216	0.260882	0.372251	0.0944753	0.372251
KY21.Chr1.1569	KH.C1.618		0.247	0.1457	TLL1: tolloid like 1	1	1	1	1	0.134421	0.14897	0.0239145	0.0940235	0.048161	0.194917	0.0293008	0.194917
KY21.Chr1.157	KH.C1.421		0.0654	0.137	ABAT: 4-aminobutyrate aminotransferase	14.6014	13.9775	26.1032	29.7928	14.6014	13.9775	26.1032	29.7928	1.0777	16.4683	1.81017	16.4683
KY21.Chr1.1570	KH.C1.533		1.8688	1.0288	MEP1B: meprin A subunit beta	1	1	1.34659	1.08848	0.402559	0.358683	1.34659	1.08848	0.236136	0.126353	0.269369	0.126353
KY21.Chr1.1571	SPKH.S1484.10002		#NUM!	#NUM!	MFNG: MFNG O-fucosylpeptide 3-beta-N-acetylglucosaminyltransferase	1	1	1	1	0	0	0	0	0	0	0	0
KY21.Chr1.1572	KH.C1.1119		0.9129	0.9883	STT3B: STT3B, catalytic subunit of the oligosaccharyltransferase complex	21.3271	19.3091	21.5633	24.132	21.3271	19.3091	21.5633	24.132	21.8821	23.9696	15.5885	23.9696
KY21.Chr1.1573	KH.C1.262		1.2101	1.0555	KRTCAP2: keratinocyte associated protein 2	104.495	103.777	104.053	125.722	104.495	103.777	104.053	125.722	148.516	122.728	145.604	122.728
KY21.Chr1.1574	KH.C1.258		#NUM!	#NUM!		1	1	1	1	0.146022	0	0.142881	0	0	0	0	0
KY21.Chr1.1575	KH.C1.1154		#NUM!	#NUM!		1	1	1	1	0	0	0.0350473	0.0306208	0.0282325	0	0	0
KY21.Chr1.1576	KH.C1.944		1.1326	1.2252	STAM: signal transducing adaptor molecule	4.53536	4.73307	4.77232	4.45209	4.53536	4.73307	4.77232	4.45209	8.02104	7.08174	7.08584	7.08174
KY21.Chr1.1577	KH.C1.573		1.237	0.8913	TP63: tumor protein p63	1	1	1	1	0.44298	0.477709	0.553486	0.434057	0.625818	0.505893	0.574655	0.505893
KY21.Chr1.1578	KH.C1.122		0.7749	0.7663		1	1	1	1	0.049254	0.066715	0.449816	0.449148	0.327841	0.42303	0.244946	0.42303
KY21.Chr1.1579	KH.C1.1078		#NUM!	0		1	1	1	1	0.421298	0.566947	0.0749521	0	0	0	0	0
KY21.Chr1.158	KH.C1.331		0.596	0.7172	RNF181: ring finger protein 181	21.2295	23.7995	16.3156	17.1941	21.2295	23.7995	16.3156	17.1941	11.3139	18.9823	16.0747	18.9823
KY21.Chr1.1580	KH.C1.1261		#NUM!	#NUM!	FTH1: ferritin heavy chain 1	1	1	1	1	0.0489496	0	0.14369	0	0	0	0	0
KY21.Chr1.1581	KH.C1.419		2.0238	1.2955	SLC25A12: solute carrier family 25 member 12	4.78456	3.78073	3.17025	5.18541	4.78456	3.78073	3.17025	5.18541	3.11059	1.53696	4.39617	1.53696
KY21.Chr1.1582	KH.C1.419		1.5193	1.9378	SLC25A12: solute carrier family 25 member 12	17.4533	16.2606	10.0441	11.5643	17.4533	16.2606	10.0441	11.5643	9.57686	6.30332	16.5334	6.30332
KY21.Chr1.1583	KH.C1.1297		0.6014	0.5368	GTPBP4: GTP binding protein 4	83.3767	77.5288	57.3299	65.9982	83.3767	77.5288	57.3299	65.9982	53.7432	89.3538	45.7702	89.3538
KY21.Chr1.1584	KH.C1.203		0.6106	0.5841	ZNF850: zinc finger protein 850	15.1471	13.1371	13.9097	14.4139	15.1471	13.1371	13.9097	14.4139	12.5316	20.5209	9.48812	20.5209
KY21.Chr1.1585	KH.C1.235		0.4743	0.521	NACA: nascent polypeptide-associated complex alpha subunit	335.675	348.882	195.528	286.13	335.675	348.882	195.528	286.13	159.663	336.604	171.985	336.604
KY21.Chr1.1586	KH.C1.235		0.8067	1.6712	GHSR: growth hormone secretagogue receptor	1.62496	1.41494	1.38262	1.14759	1.62496	1.41494	1.38262	1.14759	0.751795	0.93187	1.82108	0.93187
KY21.Chr1.1587	KH.C1.136		1.2848	0.7287		1	1	1	1	0	0.11683	0.26257	0	0.0793179	0.0617337	0.160855	0.0617337
KY21.Chr1.1588	0		#NUM!	#NUM!		1	1	1	1	0	0	0	0.18428	0	0	0.172283	0
KY21.Chr1.1589	KH.C1.315		0.444	0.6597	GHSR: growth hormone secretagogue receptor	1.43123	1.53608	1.22132	1.56503	1.43123	1.53608	1.22132	1.56503	1.23307	2.77703	2.19471	2.77703
KY21.Chr1.159	KH.C1.1000		1.9134	1.3473	PDCD6IP: programmed cell death 6 interacting protein	1.52396	1.18826	2.32488	1.17256	1.52396	1.18826	2.32488	1.17256	4.15514	2.17156	2.6409	2.17156
KY21.Chr1.1590	KH.C1.1285		0.3009	0.2689		6.79001	8.34698	5.86233	6.57312	6.79001	8.34698	5.86233	6.57312	2.04638	6.79965	2.47404	6.79965
KY21.Chr1.1591	KH.C1.616		0.3235	0.2368	IMMP2L: inner mitochondrial membrane peptidase subunit 2	3.17398	3.29369	2.79422	3.25775	3.17398	3.29369	2.79422	3.25775	1.01844	3.14765	0.875535	3.14765
KY21.Chr1.1592	KH.C1.127		0.326	0.2936	LRRN2: leucine rich repeat neuronal 2	24.1075	19.9524	21.2913	22.8011	24.1075	19.9524	21.2913	22.8011	12.555	38.5103	11.2918	38.5103
KY21.Chr1.1593	KH.C1.606		0.5052	0.4241	PDK2: pyruvate dehydrogenase kinase 2	13.3056	13.5931	11.9668	15.5901	13.3056	13.5931	11.9668	15.5901	5.85461	11.5881	6.79627	11.5881
KY21.Chr1.1594	KH.C1.1093		3.5375	4.9871		37.7604	32.695	24.3201	26.3561	37.7604	32.695	24.3201	26.3561	192.459	54.4047	145.31	54.4047
KY21.Chr1.1595	KH.C1.1240		2.0123	2.7827	KLHL20: kelch like family member 20	20.0429	17.406	13.105	13.5503	20.0429	17.406	13.105	13.5503	92.8113	46.1201	73.4156	46.1201
KY21.Chr1.1596	KH.C1.19		0.2817	0.3558	ANKMY2: ankyrin repeat and MYND domain containing 2	6.8821	6.30887	4.47754	6.4269	6.8821	6.30887	4.47754	6.4269	2.50479	8.88969	3.33805	8.88969
KY21.Chr1.1597	KH.C1.174		1.1918	1.2533	UST: uronyl 2-sulfotransferase	21.2584	21.5227	19.5462	25.2508	21.2584	21.5227	19.5462	25.2508	21.1982	17.7862	26.1229	17.7862
KY21.Chr1.1598	KH.C1.290		2.9652	2.337	ABCC1: ATP binding cassette subfamily C member 1	4.40868	3.92411	3.42584	3.94016	4.40868	3.92411	3.42584	3.94016	17.5049	5.90328	16.8218	5.90328
KY21.Chr1.1599	SPKH.C1.10055		5.1393	1.719		1	1	1	1	0.194397	0.366757	0.126811	0.0830958	0.715068	0.139136	0.595593	0.139136
KY21.Chr1.16	KH.L60.8		#NUM!	#NUM!		1	1	1	1	0	0	0	0	0	0	0	0
KY21.Chr1.160	KH.C1.666		1.4451	1.5774		2.55151	2.40527	1.84533	2.84517	2.55151	2.40527	1.84533	2.84517	5.75368	3.98131	5.65682	3.98131
KY21.Chr1.1600	KH.C1.610		0.4228	0.4983	PSMA2: proteasome subunit alpha 2	23.7837	23.673	16.1369	25.9596	23.7837	23.673	16.1369	25.9596	8.34181	19.7298	8.90682	19.7298
KY21.Chr1.1601	KH.C1.570		0	0.0361	ACTC1: actin, alpha, cardiac muscle 1	414.742	387.584	397.293	381.578	414.742	387.584	397.293	381.578	0	1.75454	0.290266	1.75454
KY21.Chr1.1602	KH.C1.406		1.0186	1.2089	ANKZF1: ankyrin repeat and zinc finger domain containing 1	1.5816	1.39759	1.28392	1.57247	1.5816	1.39759	1.28392	1.57247	2.05006	2.01244	2.5282	2.01244
KY21.Chr1.1603	KH.C1.851		0.7107	0.5002	GTPBP10: GTP binding protein 10	1.97594	1.7887	1.68458	2.27462	1.97594	1.7887	1.68458	2.27462	1.20281	1.69228	0.81309	1.69228
KY21.Chr1.1604	KH.C1.990		0.7059	0.8736	MMADHC: methylmalonic aciduria and homocystinuria, cblD type	8.34334	8.09306	7.25093	9.61775	8.34334	8.09306	7.25093	9.61775	5.65715	8.01346	6.13782	8.01346
KY21.Chr1.1605	KH.C1.712		1.1163	1.0772		1	1	2.11341	1.08087	0.579475	0.412839	2.11341	1.08087	1.10037	0.985697	1.07366	0.985697
KY21.Chr1.1606	KH.C1.1017		0.757	0.7021	NRCAM: neuronal cell adhesion molecule	2.75643	2.90882	3.51878	3.38648	2.75643	2.90882	3.51878	3.38648	4.07559	5.38382	3.29732	5.38382
KY21.Chr1.1607	KH.C1.1141		0.0936	0.1101		12.0485	10.987	11.8822	11.3548	12.0485	10.987	11.8822	11.3548	1.04691	11.1747	1.28903	11.1747
KY21.Chr1.1608	KH.C1.2		0.6297	0.5643	IMPDH2: inosine monophosphate dehydrogenase 2	20.8365	17.7774	18.6753	20.5352	20.8365	17.7774	18.6753	20.5352	14.0969	22.3858	14.1707	22.3858
KY21.Chr1.1609	KH.C1.1174		0.4252	0.4372	IFI30: IFI30, lysosomal thiol reductase	2.40196	2.52347	2.55467	3.95067	2.40196	2.52347	2.55467	3.95067	0.967223	2.27441	0.939018	2.27441
KY21.Chr1.161	KH.C1.588		0.5385	0.6233		4.88515	4.95111	3.99646	5.16909	4.88515	4.95111	3.99646	5.16909	2.61967	4.8639	4.35252	4.8639
KY21.Chr1.1610	KH.C1.624		0.4227	0.4702	LSM6: LSM6 homolog, U6 small nuclear RNA and mRNA degradation associated	51.7956	55.8903	34.9802	55.8281	51.7956	55.8903	34.9802	55.8281	18.412	43.5514	23.2152	43.5514
KY21.Chr1.1611	KH.C1.1259		0.6165	0.3703	PGAM5: PGAM family member 5, mitochondrial serine/threonine protein phosphatase	17.5258	15.2607	19.6939	20.7008	17.5258	15.2607	19.6939	20.7008	11.6176	18.844	8.01842	18.844
KY21.Chr1.1612	KH.C1.1223		0.7648	0.6297	RMDN1: regulator of microtubule dynamics 1	20.6721	19.1822	16.1922	20.2611	20.6721	19.1822	16.1922	20.2611	16.7057	21.8411	15.5208	21.8411
KY21.Chr1.1613	KH.C1.966		0.492	0.3154	RMDN1: regulator of microtubule dynamics 1	25.7312	24.1177	58.7203	70.3784	25.7312	24.1177	58.7203	70.3784	12.1288	24.6487	10.2487	24.6487
KY21.Chr1.1614	KH.C1.41		0.571	0.5218	N6AMT1: N-6 adenine-specific DNA methyltransferase 1 (putative)	1	1	1	1.21029	0.700397	0.999156	0.670751	1.21029	0.563817	0.987351	0.345404	0.987351
KY21.Chr1.1615	KH.C1.630		5.1393	5.8299		1	1	1	1	0.706642	0.849718	0.592666	0.690415	2.22798	0.433512	1.4523	0.433512
KY21.Chr1.1616	KH.C1.877		0.9041	1.4574		1.45985	1	1.39523	1.42218	1.45985	0.739056	1.39523	1.42218	1.01689	1.1247	0.895443	1.1247
KY21.Chr1.1617	KH.C1.981		1.9272	1.8149		1	1	1	1	0.776901	0.61591	0.64673	0.515482	0.904851	0.469501	0.917507	0.469501
KY21.Chr1.1618	KH.C1.916		3.9583	5.984	ALPL: alkaline phosphatase, liver/bone/kidney	4.91909	4.64142	5.41688	6.50412	4.91909	4.64142	5.41688	6.50412	13.7889	3.48354	6.38409	3.48354
KY21.Chr1.1619	KH.C1.436		33.4493	26.3634	ALPL: alkaline phosphatase, liver/bone/kidney	3.45006	3.132	3.95047	4.72754	3.45006	3.132	3.95047	4.72754	29.6244	0.885649	36.0817	0.885649
KY21.Chr1.162	KH.C1.922		0.1336	0.2112	BARHL1: BarH like homeobox 1	1	1	1.33212	1.21271	0.514096	0.638319	1.33212	1.21271	0.135075	1.01041	0.152182	1.01041
KY21.Chr1.1620	KH.C1.1126		20.7481	138.261	GLIPR2: GLI pathogenesis related 2	24.8771	28.3111	18.2082	21.1127	24.8771	28.3111	18.2082	21.1127	24.011	1.15726	172.377	1.15726
KY21.Chr1.1621	KH.C1.1003		527.65	796.416	GLIPR2: GLI pathogenesis related 2	186.231	125.294	152.163	144.044	186.231	125.294	152.163	144.044	416.863	0.790038	1360.15	0.790038
KY21.Chr1.1622	KH.C1.1101		1.5174	2.0285		27.7558	22.4971	29.825	24.2096	27.7558	22.4971	29.825	24.2096	32.2776	21.271	35.2508	21.271
KY21.Chr1.1623	KH.C1.687		0.7709	#NUM!		1	1	1	1	0.316867	0.827742	0.465078	0.270892	0.374645	0.485981	0.886398	0.485981
KY21.Chr1.1624	KH.C1.1241		1.4538	1.9433		4.41126	4.34765	7.58924	9.57309	4.41126	4.34765	7.58924	9.57309	1.64301	1.13007	3.64194	1.13007
KY21.Chr1.1625	SPKH.C1.10066		6.8524	#NUM!		1	1.1741	3.19694	3.10351	0.881628	1.1741	3.19694	3.10351	0.654044	0.0954464	2.36262	0.0954464
KY21.Chr1.1626	SPKH.C1.10066		2.3127	5.2226		1.07829	1	6.8304	9.1699	1.07829	0.444757	6.8304	9.1699	0.402603	0.174083	1.95045	0.174083
KY21.Chr1.1627	0		#NUM!	#NUM!		1	1	1	1	0	0	0	0	0.480314	0	0	0
KY21.Chr1.1628	SPKH.C1.10066		0.9636	6.8016		1	1	1.48341	1.48807	0.336894	0.0977841	1.48341	1.48807	0.132774	0.137786	0.31414	0.137786
KY21.Chr1.1629	0		#NUM!	#NUM!		1	1	1	1	0	0	0.725268	0.633666	0.14606	0	0.148103	0
KY21.Chr1.163	KH.C1.193		0	0		1	1	1.72251	2.25743	0	0.383214	1.72251	2.25743	0	1.61994	0	1.61994
KY21.Chr1.1630	KH.C1.1042		0.9559	1.1404		14.9193	15.5321	12.4568	15.187	14.9193	15.5321	12.4568	15.187	8.02194	8.39185	6.50149	8.39185
KY21.Chr1.1631	KH.C1.394		0.5696	0.5677	LSM12: LSM12 homolog	14.5446	13.624	11.0581	15.12	14.5446	13.624	11.0581	15.12	8.05567	14.1414	9.48897	14.1414
KY21.Chr1.1632	KH.C1.371		0.4047	0.4706	DTD2: D-tyrosyl-tRNA deacylase 2 (putative)	15.8847	17.938	11.9811	17.6115	15.8847	17.938	11.9811	17.6115	5.60826	13.8562	11.3073	13.8562
KY21.Chr1.1633	KH.C1.64		0.6904	0.6067		8.53813	10.1135	6.59565	10.7273	8.53813	10.1135	6.59565	10.7273	6.26678	9.07636	7.34905	9.07636
KY21.Chr1.1634	KH.C1.758		0.9045	1.5809	ADGRG7: adhesion G protein-coupled receptor G7	1.22522	1.3068	1.52627	1.38398	1.22522	1.3068	1.52627	1.38398	1.63285	1.80517	2.36752	1.80517
KY21.Chr1.1635	SPKH.C1.10179		1.9348	0.8249	SSTR2: somatostatin receptor 2	1	1	1	1	0.724422	0.59575	0.3938	0.946173	2.03025	1.04932	1.44749	1.04932
KY21.Chr1.1636	KH.C1.960		0.6871	0.5314	STRADA: STE20-related kinase adaptor alpha	16.531	15.4921	15.5867	17.5859	16.531	15.4921	15.5867	17.5859	6.07471	8.84081	6.66344	8.84081
KY21.Chr1.1637	KH.C1.878		1.1804	1.0785		2.11245	2.40786	2.94262	2.3076	2.11245	2.40786	2.94262	2.3076	5.2959	4.48633	5.49895	4.48633
KY21.Chr1.1638	KH.C1.166		#NUM!	#NUM!		1	1	1	1	0	0	0	0	0	0	0	0
KY21.Chr1.1639	KH.C1.836		1.1631	1.1026	HEXIM1: hexamethylene bisacetamide inducible 1	4.49788	4.72555	3.78065	3.65616	4.49788	4.72555	3.78065	3.65616	4.99836	4.29738	5.25686	4.29738
KY21.Chr1.164	KH.C1.10		1.2385	0.9059	LASP1: LIM and SH3 protein 1	23.9988	21.3289	17.2446	21.6673	23.9988	21.3289	17.2446	21.6673	14.3381	11.5766	13.8933	11.5766
KY21.Chr1.1640	KH.C1.55		1.0479	0.9209	ABI2: abl interactor 2	2.72666	2.82223	5.09692	4.05734	2.72666	2.82223	5.09692	4.05734	3.81184	3.63746	3.73152	3.63746
KY21.Chr1.1641	KH.C1.216		2.16	1.9254	MYL1: myosin light chain 1	125.643	121.107	135.744	189.456	125.643	121.107	135.744	189.456	161.01	74.5413	173.5	74.5413
KY21.Chr1.1642	KH.C1.1186		0.1142	0.0409	MYL1: myosin light chain 1	589.754	699.7	605.767	667.302	589.754	699.7	605.767	667.302	0.214542	1.87852	0.761402	1.87852
KY21.Chr1.1643	0		#NUM!	0		1	1	1	1	0.180038	0	0.440415	0.76958	0	0	0	0
KY21.Chr1.1644	KH.C1.20		0	0.0203	MYL1: myosin light chain 1	560.311	628.029	900.79	961.971	560.311	628.029	900.79	961.971	0	2.49149	0.605175	2.49149
KY21.Chr1.1645	KH.C1.20		0.02	0.0538	MYL1: myosin light chain 1	523.367	555.742	524.034	560.192	523.367	555.742	524.034	560.192	0.0444682	2.21504	0.946894	2.21504
KY21.Chr1.1646	KH.C1.422		0.5075	0.3512		14.6373	13.4138	9.81653	10.7326	14.6373	13.4138	9.81653	10.7326	6.17926	12.1748	4.68832	12.1748
KY21.Chr1.1647	KH.C1.704		0.8437	0.8544	NAAA: N-acylethanolamine acid amidase	6.03761	7.82999	3.87146	5.29338	6.03761	7.82999	3.87146	5.29338	4.88051	5.78449	6.13976	5.78449
KY21.Chr1.1648	KH.C1.1150		0.8484	0.8846	NAAA: N-acylethanolamine acid amidase	1.28671	1.13016	1.478	1	1.28671	1.13016	1.478	0.717405	0.926029	1.0914	0.545503	1.0914
KY21.Chr1.1649	KH.C1.748		0.6268	0.5516	TMUB1: transmembrane and ubiquitin like domain containing 1	4.27332	4.33708	3.48912	4.23395	4.27332	4.33708	3.48912	4.23395	2.69914	4.30569	1.99047	4.30569
KY21.Chr1.165	KH.C1.487		0.7583	0.6851	TIMELESS: timeless circadian clock	1.2219	1.08558	1	1.07113	1.2219	1.08558	0.958924	1.07113	1.29559	1.70851	1.03114	1.70851
KY21.Chr1.1650	KH.C1.886		0.3796	0.3123		3.11877	2.93295	1.58688	1.81306	3.11877	2.93295	1.58688	1.81306	1.27832	3.36743	0.897366	3.36743
KY21.Chr1.1651	KH.C1.111		0.7212	0.7274	AGAP1: ArfGAP with GTPase domain, ankyrin repeat and PH domain 1	4.67894	4.20193	3.94681	4.33235	4.67894	4.20193	3.94681	4.33235	4.81529	6.67671	5.11711	6.67671
KY21.Chr1.1652	KH.C1.1111		0	0.3238		1.15458	1	1	1	1.15458	0.837796	0.564872	0.658038	0	0.59026	0.461399	0.59026
KY21.Chr1.1653	KH.C1.770		0.9999	1.1355	RETREG3: reticulophagy regulator family member 3	49.9453	49.7991	49.8163	49.7599	49.9453	49.7991	49.8163	49.7599	53.7219	53.7246	56.9827	53.7246
KY21.Chr1.1654	KH.C1.1096		4.2004	0.5441	HTR1A: 5-hydroxytryptamine receptor 1A	1	1	1	1	0.201511	0.249348	0.259443	0.326413	1.42117	0.338338	0.118674	0.338338
KY21.Chr1.1655	KH.S1051.1		0.3898	0.3366		55.0514	56.3029	42.3849	50.4304	55.0514	56.3029	42.3849	50.4304	24.7694	63.5359	21.6538	63.5359
KY21.Chr1.1656	SPKH.S1051.10002		0	#NUM!		1	1	1	1	0	0.109926	0.0411756	0.179875	0	0.206526	0.201798	0.206526
KY21.Chr1.1657	SPKH.S1051.10001		3.4262	2.3597		1	1	1	1	0.33122	0.23073	0.388915	0.283163	0.835445	0.243837	0.900076	0.243837
KY21.Chr1.1658	SPKH.C1.10394		1.5601	2.616	RXFP2: relaxin/insulin like family peptide receptor 2	1	1	1	1	0.270827	0.471648	0.636004	0.879821	0.725807	0.465213	1.51521	0.465213
KY21.Chr1.1659	KH.C1.228		0.3393	0.2125		1.85631	1.69157	2.87242	2.3251	1.85631	1.69157	2.87242	2.3251	0.952775	2.8073	0.483051	2.8073
KY21.Chr1.166	0		#NUM!	0		1	1	1	1	0	0	0	0	0	0	0	0
KY21.Chr1.1660	KH.C1.840		0.3161	0.2667	DHRS13: dehydrogenase/reductase 13	14.3422	14.2381	17.5591	19.4877	14.3422	14.2381	17.5591	19.4877	5.13362	16.2372	4.48552	16.2372
KY21.Chr1.1661	KH.C1.580		0.4548	0.449	EXOSC7: exosome component 7	9.47917	8.5814	6.04339	10.5832	9.47917	8.5814	6.04339	10.5832	5.18576	11.4	5.36561	11.4
KY21.Chr1.1662	KH.C1.876		0.6056	0.5999	BRD7: bromodomain containing 7	27.0304	21.5783	24.364	24.0531	27.0304	21.5783	24.364	24.0531	20.4974	33.8432	17.6617	33.8432
KY21.Chr1.1663	KH.C1.920		0.5765	0.7519	ATP6V1D: ATPase H+ transporting V1 subunit D	44.7771	41.0117	34.3372	42.7605	44.7771	41.0117	34.3372	42.7605	29.0722	50.4227	38.6512	50.4227
KY21.Chr1.1664	KH.C1.437		0.3864	0.323	THOC6: THO complex 6	28.239	28.1275	23.0933	31.1596	28.239	28.1275	23.0933	31.1596	12.4558	32.2309	12.3348	32.2309
KY21.Chr5.240	KH.C5.451	TaGup	12.5755	14.3978	Serine peptidase inhibitor Kunitz type 3	13.5455	24.2516	9.56867	20.2061	13.5455	24.2516	9.56867	20.2061	69.0458	5.49047	96.58	5.49047
KY21.Chr1.1666	KH.C1.645		0	#NUM!		1	1	1	1	0	0.0711119	0	0.139635	0	0.250506	0.0652723	0.250506
KY21.Chr1.1667	KH.L66.4		0.4282	0.449	ISPD: isoprenoid synthase domain containing	1.09567	1.2212	1	1.23644	1.09567	1.2212	0.900566	1.23644	0.690908	1.61322	0.963286	1.61322
KY21.Chr1.1668	KH.L66.5		0	#NUM!		1	1	1	1	0.299167	0.0651253	0.146366	0.0639399	0	0.0458833	0	0.0458833
KY21.Chr1.1669	KH.L66.3		0	0		1	1	1	1	0.779763	0.740709	0.208089	0.363614	0	0.0434882	0	0.0434882
KY21.Chr1.167	SPKH.C1.10372		2.7124	2.672	FPGS: folylpolyglutamate synthase	1	1	1	1	0.13013	0.113312	0.190997	0.166874	0.974435	0.359247	0.572038	0.359247
KY21.Chr1.1670	KH.L66.2		#NUM!	#NUM!		1	1	1	1	0	0	0	0	0	0	0	0
KY21.Chr1.1671	KH.L66.1		#NUM!	#NUM!	EVX1: even-skipped homeobox 1	1	1	1	1	0.0333662	0.0871613	0.0979455	0.0855749	0	0	0.026668	0
KY21.Chr1.1672	KH.C1.416		0.6354	0.6426	G3BP2: G3BP stress granule assembly factor 2	32.7484	30.3714	32.7684	34.7085	32.7484	30.3714	32.7684	34.7085	32.1427	50.5842	22.5887	50.5842
KY21.Chr1.1673	KH.C1.964		0.4964	0.4971	LRRIQ1: leucine rich repeats and IQ motif containing 1	1	1	1	1	0.306087	0.238472	0.256154	0.263398	0.107935	0.217428	0.141634	0.217428
KY21.Chr1.1674	KH.C1.65		0.4582	0.3488	TMEM128: transmembrane protein 128	1.73311	1.8697	1.50074	2.2028	1.73311	1.8697	1.50074	2.2028	0.676996	1.47723	0.686465	1.47723
KY21.Chr1.1675	KH.C1.1069		#NUM!	#NUM!		1	1	1	1	0	0	0	0.0958345	0	0	0.0895955	0
KY21.Chr1.1676	KH.C1.896		1.0146	0.8854		18.1367	15.0499	16.549	17.3126	18.1367	15.0499	16.549	17.3126	19.3242	19.0448	16.7487	19.0448
KY21.Chr1.1677	KH.C1.795		0.4069	0.4895		9.17032	9.26843	9.89442	12.8796	9.17032	9.26843	9.89442	12.8796	4.09818	10.0712	6.44594	10.0712
KY21.Chr1.1678	KH.C1.972		0.5621	0.1766		1	1	1	1	0.110096	0.123257	0.184677	0.20169	0.0867807	0.154382	0.0251413	0.154382
KY21.Chr1.1679	KH.C1.839		0.891	0.995		14.5937	10.9065	13.0992	13.1885	14.5937	10.9065	13.0992	13.1885	11.8881	13.3413	12.7202	13.3413
KY21.Chr1.168	KH.C1.927		0.7373	0.8787	DIRC2: disrupted in renal carcinoma 2	1	1	1	1	0.325091	0.363954	0.704362	0.669993	0.302004	0.40956	0.570697	0.40956
KY21.Chr1.1680	KH.C1.972		0.8864	0.4357		6.09966	6.39602	1.42907	4.29657	6.09966	6.39602	1.42907	4.29657	5.34965	6.03469	3.43321	6.03469
KY21.Chr1.1681	KH.C1.639		0.4137	0.3479	TMEM177: transmembrane protein 177	27.043	24.5209	18.0783	21.9728	27.043	24.5209	18.0783	21.9728	8.33849	20.1553	8.03832	20.1553
KY21.Chr1.1682	KH.C1.26		0.8285	1.0392	CREB1: cAMP responsive element binding protein 1	21.3796	23.7864	19.6274	22.0133	21.3796	23.7864	19.6274	22.0133	25.3558	30.6015	34.2641	30.6015
KY21.Chr1.1683	KH.C1.1025		1.1688	1.6738	NFX1: nuclear transcription factor, X-box binding 1	5.66104	4.59491	4.28848	4.8289	5.66104	4.59491	4.28848	4.8289	7.95152	6.80296	7.78593	6.80296
KY21.Chr1.1684	KH.C1.255		0.6531	0.5091	SMUG1: single-strand-selective monofunctional uracil-DNA glycosylase 1	2.69914	2.65876	2.59156	2.9565	2.69914	2.65876	2.59156	2.9565	2.02115	3.09441	2.06291	3.09441
KY21.Chr1.1685	KH.C1.793		0.4126	0.4572		5.2584	4.04459	2.45831	4.82012	5.2584	4.04459	2.45831	4.82012	2.23359	5.4124	2.05469	5.4124
KY21.Chr1.1686	KH.C1.52		0.5669	0.589	CINP: cyclin dependent kinase 2 interacting protein	18.3538	15.7873	16.1031	16.1677	18.3538	15.7873	16.1031	16.1677	10.0697	17.7623	11.1914	17.7623
KY21.Chr1.1687	KH.C1.810		0.374	0.6117	CXorf58: chromosome X open reading frame 58	1.34055	1.78985	1.45747	1.80821	1.34055	1.78985	1.45747	1.80821	0.540071	1.44378	0.809532	1.44378
KY21.Chr1.1688	KH.C1.656		0.7143	1.0185	CYP4A11: cytochrome P450 family 4 subfamily A member 11	4.99726	6.03817	3.32395	6.45629	4.99726	6.03817	3.32395	6.45629	4.94584	6.92372	5.11599	6.92372
KY21.Chr1.1689	KH.C1.660		1.2045	1.5384		1	1	1	1	0.357705	0.700817	0.262509	0.382256	0.528661	0.438892	0.679004	0.438892
KY21.Chr1.169	KH.C1.376		0.7728	0.6896	ZBED4: zinc finger BED-type containing 4	15.0073	12.3096	10.5469	10.7034	15.0073	12.3096	10.5469	10.7034	10.6528	13.7847	8.91313	13.7847
KY21.Chr1.1690	KH.C1.161		0.7573	0.8633	KANSL2: KAT8 regulatory NSL complex subunit 2	2.66085	2.47141	2.11353	2.35507	2.66085	2.47141	2.11353	2.35507	2.38522	3.14954	2.26013	3.14954
KY21.Chr1.1691	0		0.2532	0.2331		1	1	1	1	0.211044	0.367535	0.265506	0.412395	0.974338	3.84716	0.722902	3.84716
KY21.Chr1.1692	KH.C1.693		0.3966	0.465	ZFAND4: zinc finger AN1-type containing 4	1.36306	1.24725	1.84615	1.19821	1.36306	1.24725	1.84615	1.19821	0.83767	2.1118	0.966331	2.1118
KY21.Chr1.1693	KH.C1.646		0.1606	0.124	C10orf107: chromosome 10 open reading frame 107	1.94239	1.79324	1.60293	1.70058	1.94239	1.79324	1.60293	1.70058	0.147571	0.918842	0.112226	0.918842
KY21.Chr1.1694	KH.C1.537		0	#NUM!		1	1	1	1	0.0428006	0	0.0418801	0	0	0.0131287	0	0.0131287
KY21.Chr1.1695	KH.C1.1051		0.819	0.9525	ADGRG4: adhesion G protein-coupled receptor G4	1	1	1.50525	1.14494	0.877757	0.693397	1.50525	1.14494	1.14123	1.39341	1.43926	1.39341
KY21.Chr1.1696	SPKH.C1.10082		0.6424	0.4858	DHX34: DExH-box helicase 34	1	1.05954	1	1	0.96408	1.05954	0.604473	0.760184	0.553335	0.861329	0.501227	0.861329
KY21.Chr1.1697	KH.C1.105		0.6046	0.6919	CCDC51: coiled-coil domain containing 51	1.34667	1.57047	1.67066	1.66524	1.34667	1.57047	1.67066	1.66524	1.06148	1.75558	0.903344	1.75558
KY21.Chr1.1698	KH.C1.241		1.1198	0.8494	VPS53: VPS53, GARP complex subunit	8.02164	6.4409	6.67541	7.90458	8.02164	6.4409	6.67541	7.90458	10.1639	9.07573	8.46852	9.07573
KY21.Chr1.1699	KH.C1.155		0.9177	5.8299		1	1	1	1	0	0.119185	0.267863	0.175524	0.269723	0.293898	0.328194	0.293898
KY21.Chr1.17	KH.L60.16		0.6829	0.6815	RTFDC1: replication termination factor 2 domain containing 1	31.305	35.0895	22.5794	29.4464	31.305	35.0895	22.5794	29.4464	24.2073	35.4434	23.9695	35.4434
KY21.Chr1.170	KH.S345.1		0.237	0.1025		4.64653	2.75352	19.765	20.7445	4.64653	2.75352	19.765	20.7445	3.15383	13.3026	0.980016	13.3026
KY21.Chr1.1700	SPKH.C1.10227		0	0	FOXL2: forkhead box L2	1	1	1	1	0	0.142591	0	0	0	0.100461	0	0.100461
KY21.Chr1.1701	KH.C1.1116		0.1284	0	HAND2: heart and neural crest derivatives expressed 2	1	1	1	1	0	0.0460881	0	0.0452492	0.0417199	0.324709	0	0.324709
KY21.Chr1.1702	KH.C1.688		1.0079	1.017	PPP2R3A: protein phosphatase 2 regulatory subunit B''alpha	3.53403	3.6268	3.36052	3.37337	3.53403	3.6268	3.36052	3.37337	3.66005	3.6311	3.56789	3.6311
KY21.Chr1.1703	KH.C1.347		1.313	1.4551	SEC62: SEC62 homolog, preprotein translocation factor	15.0558	14.3678	9.58049	12.4981	15.0558	14.3678	9.58049	12.4981	22.6518	17.2519	25.0828	17.2519
KY21.Chr8.1171	0	TaGup	11.0817	10.0404		1.11573	1.74875	1.74677	2.67077	1.11573	1.74875	1.74677	2.67077	24.2728	2.19034	11.0577	2.19034
KY21.Chr1.1705	KH.C1.495		0.3977	0.186	CTRL: chymotrypsin like	1.16925	1.10722	1	1	1.16925	1.10722	0.800872	0.737207	1.15204	2.89616	0.420537	2.89616
KY21.Chr1.1706	KH.C1.501		0.4748	0.774		16.5015	16.4566	5.2442	6.99336	16.5015	16.4566	5.2442	6.99336	1.8899	3.98014	5.2981	3.98014
KY21.Chr1.1707	KH.C1.1283		0.3031	0.8001		1	1	3.06982	3.18021	0.179274	0.234156	3.06982	3.18021	0.741871	2.44709	0.501498	2.44709
KY21.Chr1.1708	SPKH.C1.10112		0.6424	0.4858		1.12571	1.08913	1	1	1.12571	1.08913	0.611945	0.106931	0.197181	0.306935	0.199939	0.306935
KY21.Chr1.1709	KH.C1.885		#NUM!	#NUM!		1	1	1	1	0	0	0	0	0	0	0	0
KY21.Chr1.171	KH.C1.912		0.3616	0.4169	CBX3: chromobox 3	108.087	112.468	69.2462	106.392	108.087	112.468	69.2462	106.392	46.6909	129.117	58.246	129.117
KY21.Chr1.1710	KH.C1.1183		0.0917	#NUM!		1	1	1	1	0	0.128731	0.361647	0.189582	0.0582651	0.634874	0	0.634874
KY21.Chr1.1711	KH.C1.464		0.6093	1.1188		1	1	1	1	0.659395	0.547466	0.540178	0.694819	0.556014	0.912537	0.465741	0.912537
KY21.Chr1.1712	KH.C1.1189		0	#NUM!		1	1	1	1	0	0	0	0.0450361	0	0.0323179	0	0.0323179
KY21.Chr1.1713	KH.C1.1266		0.3212	0.7773		1	1	1	1	0.16418	0.0714803	0.200811	0	0.0647055	0.201443	0.131221	0.201443
KY21.Chr1.1714	KH.C1.40		1.0696	1.0662		149.867	146.176	137.81	151.402	149.867	146.176	137.81	151.402	94.1375	88.0062	155.108	88.0062
KY21.Chr1.1715	KH.C1.423		0.3458	0.4808	CA2: carbonic anhydrase 2	21.8485	20.5722	17.0995	21.8064	21.8485	20.5722	17.0995	21.8064	8.37732	24.2207	15.485	24.2207
KY21.Chr1.1716	KH.C1.297		0.4318	0.3643	CDK2: cyclin dependent kinase 2	4.24999	3.87948	3.09382	4.24768	4.24999	3.87948	3.09382	4.24768	1.97437	4.57221	1.62456	4.57221
KY21.Chr1.1717	KH.S1007.3		0.6509	0.8296	HAT1: histone acetyltransferase 1	9.95638	8.38123	6.99885	10.116	9.95638	8.38123	6.99885	10.116	7.30844	11.2274	9.28098	11.2274
KY21.Chr1.1718	KH.S1007.2		0.8057	1.587		3996.34	4810.51	2613.04	3600.92	3996.34	4810.51	2613.04	3600.92	1677.1	2081.31	4315.68	2081.31
KY21.Chr1.1719	KH.S1007.4		1.1605	0.5619		6.44699	10.0818	5.47151	7.31128	6.44699	10.0818	5.47151	7.31128	2.90382	2.50221	2.5238	2.50221
KY21.Chr1.172	KH.C1.539		0.3969	0.449	HNRNPA1: heterogeneous nuclear ribonucleoprotein A1	33.5246	31.1493	30.1703	30.8068	33.5246	31.1493	30.1703	30.8068	14.5641	36.694	21.378	36.694
KY21.Chr1.1720	0		#NUM!	#NUM!		1	1	1	1	0	0	0	0	0	0	0	0
KY21.Chr1.1721	KH.S1007.1		1.6686	2.3084		46.5528	42.9453	9.23947	14.7128	46.5528	42.9453	9.23947	14.7128	36.274	21.7387	24.6291	21.7387
KY21.Chr1.1722	KH.C1.1262		1.1265	1.5595	DIRC2: disrupted in renal carcinoma 2	2.34941	2.40259	1.65733	1.73606	2.34941	2.40259	1.65733	1.73606	1.32789	1.17876	2.3363	1.17876
KY21.Chr1.1723	KH.C1.251		0.6705	0.8038	PPP2R1A: protein phosphatase 2 scaffold subunit Aalpha	151.262	143.896	128.559	132.414	151.262	143.896	128.559	132.414	108.661	162.042	116.847	162.042
KY21.Chr1.1724	KH.C1.1207		1.012	0.6582	SFXN2: sideroflexin 2	5.0948	5.48956	3.83754	5.38964	5.0948	5.48956	3.83754	5.38964	4.07364	4.02501	4.58469	4.02501
KY21.Chr1.1725	KH.C1.705		1.0416	1.0583	BNIP3: BCL2 interacting protein 3	6.01524	5.694	4.87957	5.82261	6.01524	5.694	4.87957	5.82261	3.93075	3.77357	4.54404	3.77357
KY21.Chr1.1726	KH.C1.1229		0.5519	0.694	MRPL35: mitochondrial ribosomal protein L35	8.16363	8.77413	6.68456	11.2134	8.16363	8.77413	6.68456	11.2134	6.40786	11.6091	7.50761	11.6091
KY21.Chr1.1727	KH.C1.259		0.4729	0.4176	PSMB2: proteasome subunit beta 2	40.0802	42.771	29.7903	44.2004	40.0802	42.771	29.7903	44.2004	16.1681	34.1863	15.3224	34.1863
KY21.Chr1.1728	KH.C1.776		0.6771	0.3367	LRRIQ4: leucine rich repeats and IQ motif containing 4	1	1	1	1	0.647127	0.528271	0.50129	0.864427	0.414442	0.612043	0.377137	0.612043
KY21.Chr1.1729	KH.C1.1055		#NUM!	3.5627		1	1	1	1	0.159497	0	0.156066	0	0	0	0.70113	0
KY21.Chr1.173	KH.C1.584		1.3168	1.5358	TSPAN31: tetraspanin 31	17.0645	19.7012	13.4281	17.9756	17.0645	19.7012	13.4281	17.9756	21.6905	16.4719	26.7436	16.4719
KY21.Chr1.1730	KH.C1.547		1.3507	1.1817	KIF17: kinesin family member 17	1	1	1	1	0.146067	0.135668	0.104812	0.124873	0.157349	0.116492	0.175116	0.116492
KY21.Chr1.1731	KH.C1.819		1.1871	0.9612		318.185	306.09	161.688	245.849	318.185	306.09	161.688	245.849	155.693	131.147	168.146	131.147
KY21.Chr1.1732	KH.C1.1210		1.2848	0.2429		1	1	1	1	0.15065	0.131179	0	0.128792	0.474985	0.369684	0.120407	0.369684
KY21.Chr1.1733	KH.C1.420		1.3237	0.2341		2.63533	3.38746	1.96469	3.27216	2.63533	3.38746	1.96469	3.27216	6.72629	5.08115	1.003	5.08115
KY21.Chr1.1734	KH.C1.455		0.9152	0.9262	YME1L1: YME1 like 1 ATPase	4.96074	4.6417	2.8029	4.32206	4.96074	4.6417	2.8029	4.32206	4.62792	5.05669	5.25365	5.05669
KY21.Chr1.1735	SPKH.C1.10476		0.6424	1.2955		1	1	1	1	0.11045	0.208378	0.0900616	0.0944241	0.203138	0.316208	0.235405	0.316208
KY21.Chr1.1736	KH.C1.490		0.7557	1.8461		1	1	1	1	0.131693	0.286681	0.171814	0.150113	0.173006	0.228908	0.333309	0.228908
KY21.Chr1.1737	KH.C1.641		1.6342	1.8779	SORT1: sortilin 1	2.18379	1.80945	2.08203	1.968	2.18379	1.80945	2.08203	1.968	4.47249	2.73669	4.57483	2.73669
KY21.Chr1.1738	KH.C1.195		#NUM!	0.4858	CCDC62: coiled-coil domain containing 62	1	1	1	1	0	0	0	0	0	0	0.3567	0
KY21.Chr1.1739	KH.C1.106		0.5421	1.104	SLC22A5: solute carrier family 22 member 5	12.2874	11.5884	7.25177	9.15014	12.2874	11.5884	7.25177	9.15014	11.5169	21.2428	21.2314	21.2428
KY21.Chr1.174	KH.C1.352		0.6315	0.4927	NAA38: N(alpha)-acetyltransferase 38, NatC auxiliary subunit	22.3439	27.6404	23.0749	28.1478	22.3439	27.6404	23.0749	28.1478	16.7248	26.4829	17.6785	26.4829
KY21.Chr1.1740	KH.C1.613		0.5353	0.8502	TCTE1: t-complex-associated-testis-expressed 1	1	1	1	1.04659	0.612107	0.852793	0.71873	1.04659	0.482479	0.90124	0.684918	0.90124
KY21.Chr1.1741	KH.C1.945		2.5696	0.8097	CCDC166: coiled-coil domain containing 166	1	1	1	1	0.180087	0.0896067	0.22656	0.10997	0.243342	0.0946973	0.205621	0.0946973
KY21.Chr1.1742	KH.C1.987		0.8477	0.6548	BAZ2B: bromodomain adjacent to zinc finger domain 2B	2.34468	1.92356	3.0219	2.00448	2.34468	1.92356	3.0219	2.00448	3.42388	4.03885	2.69561	4.03885
KY21.Chr1.1743	KH.C1.473		0.5628	1.0591		5.3338	6.96666	4.81315	4.40791	5.3338	6.96666	4.81315	4.40791	2.14883	3.81756	5.16303	3.81756
KY21.Chr1.1744	KH.C1.1137		0.8898	0.8041	ADCK1: aarF domain containing kinase 1	1.76416	1.53615	1.61364	1.74863	1.76416	1.53615	1.61364	1.74863	1.975	2.21946	1.71653	2.21946
KY21.Chr1.1745	KH.C1.242		0.0113	0.0513	ACTC1: actin, alpha, cardiac muscle 1	474.262	493.641	408.463	337.188	474.262	493.641	408.463	337.188	0.065526	5.76292	0.53154	5.76292
KY21.Chr1.1746	KH.C1.942		0.3303	0.2258	SLC6A1: solute carrier family 6 member 1	1	1	1	1	0.410058	0.484582	0.386908	0.826323	0.415566	1.25782	0.386264	1.25782
KY21.Chr1.1747	KH.C1.321		0.5188	0.3533	CSMD1: CUB and Sushi multiple domains 1	1	1	1	1	0.295434	0.121059	0.323089	0.14857	0.287661	0.554392	0.222236	0.554392
KY21.Chr1.1748	KH.C1.291		1.2848	#NUM!	CSMD1: CUB and Sushi multiple domains 1	1	1	1	1	0.0995395	0	0	0	0.0784596	0.0610657	0.0795571	0.0610657
KY21.Chr1.1749	KH.C1.452		0.996	1.1962		4.69491	4.34363	3.3306	4.82649	4.69491	4.34363	3.3306	4.82649	5.6805	5.70288	6.74496	5.70288
KY21.Chr1.175	KH.C1.245		0.424	0.3579	SAP30L: SAP30 like	30.1271	33.0401	19.2619	26.2925	30.1271	33.0401	19.2619	26.2925	10.6142	25.0283	12.6324	25.0283
KY21.Chr1.1750	KH.C1.30		1.5545	2.2988		61.9779	61.6657	45.319	56.8682	61.9779	61.6657	45.319	56.8682	91.1935	58.6617	116.206	58.6617
KY21.Chr1.1751	KH.C1.261		0.8877	1.5654		8.82377	8.31703	8.32245	10.6153	8.82377	8.31703	8.32245	10.6153	4.08703	4.60403	11.5965	4.60403
KY21.Chr1.1752	KH.C1.1089		0.4835	0.4228	KLHDC1: kelch domain containing 1	19.6044	17.6028	16.7446	20.2164	19.6044	17.6028	16.7446	20.2164	9.30127	19.2374	11.235	19.2374
KY21.Chr1.1753	KH.C1.1089		0.2218	0.2695		9.09896	15.4984	10.6214	14.9434	9.09896	15.4984	10.6214	14.9434	4.84427	21.8385	5.1672	21.8385
KY21.Chr1.1754	KH.C1.217		0.8967	0.3747	NSMCE4A: NSE4 homolog A, SMC5-SMC6 complex component	1.85975	1.60252	1.3269	2.03707	1.85975	1.60252	1.3269	2.03707	2.04615	2.28184	1.33157	2.28184
KY21.Chr1.1755	KH.C1.298		0.6406	0.6622	BHMT: betaine--homocysteine S-methyltransferase	5.02896	5.51086	4.12847	5.50164	5.02896	5.51086	4.12847	5.50164	3.04016	4.74542	4.15566	4.74542
KY21.Chr1.1756	KH.C1.1087		0	0.9716	BHMT: betaine--homocysteine S-methyltransferase	1	1	1	1	0.0425992	0.315295	0.0625245	0.0546276	0	0.0914685	0.0170238	0.0914685
KY21.Chr3.438	KH.L63.12	TaGup	8.6174	9.168		4.58468	10.9543	4.26936	8.17978	4.58468	10.9543	4.26936	8.17978	71.5421	8.30199	45.264	8.30199
KY21.Chr11.358	KH.C11.454	TaGup	4.6934	1.2091		4.60246	16.4425	4.25094	14.4517	4.60246	16.4425	4.25094	14.4517	36.0405	7.67894	15.2298	7.67894
KY21.Chr1.1759	KH.C1.453		0	0.2429		3.74719	2.91942	3.28063	3.54071	3.74719	2.91942	3.28063	3.54071	0	1.08892	0.315257	1.08892
KY21.Chr1.176	KH.C1.96		0.5305	0.4708	ATP5G2: ATP synthase, H+ transporting, mitochondrial Fo complex subunit C2 (subunit 9)	417.476	480.282	319.851	426.568	417.476	480.282	319.851	426.568	160.418	302.334	184.959	302.334
KY21.Chr1.1760	KH.C1.522		0.3111	0.4101		328.731	398.375	289.646	411.914	328.731	398.375	289.646	411.914	69.2657	222.625	111.757	222.625
KY21.Chr1.1761	KH.C1.1001		0.7787	0.6984	UBE2M: ubiquitin conjugating enzyme E2 M	24.958	24.8487	19.1376	22.3298	24.958	24.8487	19.1376	22.3298	15.6886	20.1454	17.0622	20.1454
KY21.Chr1.1762	KH.C1.74		0.804	0.4858		3.39861	2.95936	6.32692	7.71926	3.39861	2.95936	6.32692	7.71926	2.25888	2.80943	1.72649	2.80943
KY21.Chr1.1763	KH.C1.60		0.3774	0.163		1.96425	1.79485	2.01692	1.84511	1.96425	1.79485	2.01692	1.84511	0.993955	2.63322	0.465165	2.63322
KY21.Chr1.1764	KH.C1.940		0.3298	0.2704	YRDC: yrdC N6-threonylcarbamoyltransferase domain containing	107.594	111.707	73.5372	90.092	107.594	111.707	73.5372	90.092	40.8739	123.903	39.3242	123.903
KY21.Chr1.1765	SPKH.C1.10060		1.4989	1.7678		1.94308	1.69195	1.82745	1.58052	1.94308	1.69195	1.82745	1.58052	2.81039	1.87487	3.95038	1.87487
KY21.Chr1.1766	KH.C1.351		0	0.0118		1	1	1.18808	1.37774	0.728515	0.499798	1.18808	1.37774	0	2.23466	0.0352889	2.23466
KY21.Chr1.1767	KH.C1.1206		0	0.0511		1	1	1	1	0.0868923	0.151324	0.425117	0.297139	0	0.319841	0.0694488	0.319841
KY21.Chr1.1768	KH.C1.132		0	0.9716		1	1	1	1	0.0445664	0.077613	0	0.1143	0	0.191385	0.0356198	0.191385
KY21.Chr1.1769	SPKH.C1.10568		1.2848	0.0747		1	1	1	1	0.323554	0.394431	0.253276	0.221287	0.306041	0.238194	0.0517202	0.238194
KY21.Chr1.177	KH.C1.359		1.1184	1.3243	ZFX: zinc finger protein, X-linked	2.08745	2.3333	1.72385	2.07567	2.08745	2.3333	1.72385	2.07567	1.96045	1.75289	2.17719	1.75289
KY21.Chr1.1770	SPKH.C1.10444		0	0.1388		1	1	1	1	0.170741	0	0.125302	0.145968	0	0.07856	0.0341163	0.07856
KY21.Chr1.1771	KH.C1.129		1.7915	2.0628	RHOB: ras homolog family member B	36.1649	30.7228	22.7726	28.6844	36.1649	30.7228	22.7726	28.6844	25.2437	14.0903	43.0591	14.0903
KY21.Chr1.1772	KH.C1.432		1.0119	1.1002	CHKA: choline kinase alpha	20.2627	18.4189	14.2849	18.3999	20.2627	18.4189	14.2849	18.3999	11.5892	11.4522	17.396	11.4522
KY21.Chr1.1773	KH.C1.803		0.7668	0.6522	PAQR9: progestin and adipoQ receptor family member 9	5.3502	5.32832	3.45807	5.34324	5.3502	5.32832	3.45807	5.34324	5.36496	6.99612	4.45924	6.99612
KY21.Chr1.1774	KH.C1.1022		0.8905	2.0708		18.0719	22.2854	9.6082	18.1289	18.0719	22.2854	9.6082	18.1289	16.5502	18.5848	28.4705	18.5848
KY21.Chr1.1775	KH.C1.782		0.6985	0.6964	NLE1: notchless homolog 1	2.85199	3.01554	1.85741	3.83935	2.85199	3.01554	1.85741	3.83935	3.04358	4.35707	2.39787	4.35707
KY21.Chr1.1776	SPKH.S1984.10002		#NUM!	#NUM!	ZMYM1: zinc finger MYM-type containing 1	1	1	1	1	0	0	0	0	0	0	0	0
KY21.Chr9.130	KH.C9.203	TaGup	4.686	3.2653	CTH: cystathionine gamma-lyase	8.62082	18.6659	4.51396	12.4245	8.62082	18.6659	4.51396	12.4245	31.3983	6.70039	27.8864	6.70039
KY21.Chr9.1057	KH.C9.281	TaGup	4.5089	3.3115	ASS1: argininosuccinate synthase 1	2.51832	9.31389	1.45668	9.0883	2.51832	9.31389	1.45668	9.0883	6.80279	1.50874	4.85896	1.50874
KY21.Chr1.1779	KH.C1.23		5.7682	3.308	GRHL1: grainyhead like transcription factor 1	1	1	1	1	0.737625	0.959371	0.717191	0.706432	4.6918	0.813389	3.32833	0.813389
KY21.Chr1.178	KH.C1.596		0.4905	0.7066	RDH14: retinol dehydrogenase 14 (all-trans/9-cis/11-cis)	1.66167	1.31041	1	1.5814	1.66167	1.31041	0.981695	1.5814	0.518967	1.05787	0.801868	1.05787
KY21.Chr1.1780	KH.C1.1097		#NUM!	#NUM!		1	1	1	1	0	0	0	0	0	0	0	0
KY21.Chr1.1781	KH.C1.1227		0.6781	1.1659	XIAP: X-linked inhibitor of apoptosis	1	1	1	1	0.430624	0.140613	0.316021	0.552215	0.806144	1.18881	0.774398	1.18881
KY21.Chr1.1782	KH.C1.138		0.5448	0.7127	FAM155A: family with sequence similarity 155 member A	6.31026	6.26478	6.15114	6.96813	6.31026	6.26478	6.15114	6.96813	4.57826	8.40233	5.73123	8.40233
KY21.Chr1.1783	KH.C1.622		1.1536	1.1472	SUCLA2: succinate-CoA ligase ADP-forming beta subunit	5.62744	4.26896	3.58496	5.21654	5.62744	4.26896	3.58496	5.21654	4.84083	4.19616	5.16134	4.19616
KY21.Chr1.1784	KH.C1.889		0.8468	0.7793	TWF2: twinfilin actin binding protein 2	9.65757	7.8272	7.57442	8.44686	9.65757	7.8272	7.57442	8.44686	7.83486	9.25172	9.33384	9.25172
KY21.Chr1.1785	KH.C1.497		0	#NUM!		1	1	1	1	0	0	0.303831	0	0	0.680328	0	0.680328
KY21.Chr1.1786	KH.C1.1226		0.4996	0.6142	FUCA2: fucosidase, alpha-L- 2, plasma	3.01893	2.83906	3.04853	2.84932	3.01893	2.83906	3.04853	2.84932	1.46584	2.93367	1.06167	2.93367
KY21.Chr1.1787	KH.C1.1177		0.9422	0.753		11.2031	12.5835	7.654	12.5812	11.2031	12.5835	7.654	12.5812	9.77107	10.3703	11.4972	10.3703
KY21.Chr1.1788	KH.C1.600		0.7941	0.8328	GPR161: G protein-coupled receptor 161	1.00309	1	1	1	1.00309	0.700264	0.905364	0.835372	0.838375	1.05569	0.912305	1.05569
KY21.Chr1.1789	KH.C1.1009		0.8651	0.7253	CCDC50: coiled-coil domain containing 50	3.90859	4.02739	3.76078	4.31608	3.90859	4.02739	3.76078	4.31608	4.3132	4.98553	4.21733	4.98553
KY21.Chr1.179	KH.C1.866		0.891	1.4979	RDH14: retinol dehydrogenase 14 (all-trans/9-cis/11-cis)	2.65474	1.33363	1	1	2.65474	1.33363	0.599456	0.829262	0.865184	0.970918	0.754874	0.970918
KY21.Chr1.1790	KH.C1.780		0.5073	0.5105	TKT: transketolase	374.802	376.648	312.017	373.663	374.802	376.648	312.017	373.663	181.855	358.439	178.768	358.439
KY21.Chr1.1791	KH.C1.239		0.5786	0.4434	UTP3: UTP3, small subunit processome component	14.3133	13.6382	10.8341	14.6386	14.3133	13.6382	10.8341	14.6386	10.7887	18.6456	8.09354	18.6456
KY21.Chr1.1792	KH.C1.435		1.361	1.5022	PGD: phosphogluconate dehydrogenase	10.3516	7.39929	5.49738	6.7723	10.3516	7.39929	5.49738	6.7723	9.4879	6.9709	12.0454	6.9709
KY21.Chr1.1793	KH.C1.243		0.4104	0.4463	RPP21: ribonuclease P/MRP subunit p21	17.7144	21.5822	19.5447	24.1185	17.7144	21.5822	19.5447	24.1185	7.9296	19.32	12.1773	19.32
KY21.Chr1.1794	KH.C1.1128		0	0.4091	TEX36: testis expressed 36	1.16638	1.26954	1.02717	1.24644	1.16638	1.26954	1.02717	1.24644	0	0.322	0.372893	0.322
KY21.Chr1.1795	KH.C1.1005		0.327	0.2206	PLCH2: phospholipase C eta 2	1	1	1.33193	1	0.800527	0.710625	1.33193	0.979963	0.682556	2.08673	0.333604	2.08673
KY21.Chr1.1796	KH.C1.1088		3.7483	2.5646		14.2236	11.7903	20.3812	23.9519	14.2236	11.7903	20.3812	23.9519	40.1576	10.7133	34.6509	10.7133
KY21.Chr1.1797	KH.C1.811		#NUM!	6.8016		1	1	1	1	0.481317	0.704867	0.406743	0.785556	0.103469	0	0.48961	0
KY21.Chr1.1798	KH.C1.669		3.0197	3.5238	CASZ1: castor zinc finger 1	1.0721	1	2.41715	1.03888	1.0721	0.994819	2.41715	1.03888	5.71939	1.89398	5.31751	1.89398
KY21.Chr1.1799	KH.C1.370		0.1	0.0579	MDGA1: MAM domain containing glycosylphosphatidylinositol anchor 1	3.64023	3.56835	3.26333	3.65248	3.64023	3.56835	3.26333	3.65248	0.32645	3.2629	0.313595	3.2629
KY21.Chr1.18	KH.L60.5		0.7006	0.6834	TOR1B: torsin family 1 member B	93.8508	89.0929	65.1661	72.9272	93.8508	89.0929	65.1661	72.9272	50.4611	72.0192	53.9379	72.0192
KY21.Chr1.180	KH.C1.858		0.4676	0.558	RNASEH1: ribonuclease H1	39.9795	38.8241	34.3612	44.2443	39.9795	38.8241	34.3612	44.2443	21.8694	46.761	27.044	46.761
KY21.Chr1.1800	KH.C1.1048		0.0221	0.0449		1.04428	1.0586	1	1.1326	1.04428	1.0586	0.777799	1.1326	0.0245709	1.10917	0.0622864	1.10917
KY21.Chr1.1801	KH.C1.873		0	#NUM!		1	1	1	1	0	0	0	0	0	0.0663455	0	0.0663455
KY21.Chr1.1802	KH.C1.401		0.8762	0.845	RNF13: ring finger protein 13	2.94065	2.66115	2.38189	3.13678	2.94065	2.66115	2.38189	3.13678	2.38792	2.72513	2.74795	2.72513
KY21.Chr1.1803	KH.C1.1195		1.2055	1.6922	SCYL2: SCY1 like pseudokinase 2	1.30148	1.23904	1.25651	1.35001	1.30148	1.23904	1.25651	1.35001	1.55931	1.29347	2.14977	1.29347
KY21.Chr1.1804	SPKH.C1.10064		48.5669	38.3805	ACAN: aggrecan	1	1.05902	1	1	0.823881	1.05902	0.575829	0.570182	5.84464	0.120342	4.95434	0.120342
KY21.Chr1.1805	KH.C1.460		0.4728	0.5852	CYP2B6: cytochrome P450 family 2 subfamily B member 6	1.25898	1	1.08697	1.1143	1.25898	0.851215	1.08697	1.1143	0.537041	1.13582	0.62742	1.13582
KY21.Chr1.1806	KH.C1.952		0.6931	0.7055		4.00253	4.35654	6.85378	6.07369	4.00253	4.35654	6.85378	6.07369	3.23378	4.66542	4.55862	4.66542
KY21.Chr1.1807	KH.L154.31		0	0.7773	HIST2H3A: histone cluster 2 H3 family member a	1	1	1	1.51725	0.887376	0.289758	0.651218	1.51725	0	0.136097	1.06386	0.136097
KY21.Chr1.1808	SPKH.C1.10078		3.4262	1.2251		1	1	1	1	0.352966	0.293377	0.392471	0.301753	0.40468	0.118112	0.371871	0.118112
KY21.Chr1.1809	KH.C1.589		0.9511	0.965	PLEKHM2: pleckstrin homology and RUN domain containing M2	2.73737	1.78268	2.8473	2.74334	2.73737	1.78268	2.8473	2.74334	3.10051	3.25987	2.68424	3.25987
KY21.Chr1.181	KH.C1.234		0.4076	0.4185	CLNS1A: chloride nucleotide-sensitive channel 1A	13.2937	12.6441	11.2067	17.2047	13.2937	12.6441	11.2067	17.2047	6.38379	15.6585	9.25193	15.6585
KY21.Chr1.1810	0		0.2141	0.0725		5.41086	4.21558	3.734	4.09016	5.41086	4.21558	3.734	4.09016	0.269367	1.2579	0.227612	1.2579
KY21.Chr1.1811	0		#NUM!	#NUM!		1	1	1	1	0	0	0	0	0	0	0	0
KY21.Chr1.1812	KH.C1.201		0.9177	0.8614	SLC16A14: solute carrier family 16 member 14	1	1	1	1	0.765748	0.889039	0.90702	0.976222	1.64132	1.78843	0.923406	1.78843
KY21.Chr1.1813	KH.C1.753		0.4841	0.4515	DHX37: DEAH-box helicase 37	5.27071	4.96162	4.40905	5.0636	5.27071	4.96162	4.40905	5.0636	4.38499	9.05652	3.66732	9.05652
KY21.Chr1.1814	KH.C1.752		1.1727	0.9062		1	1	1	1	0.679372	0.572728	0.436116	0.429126	0.463872	0.395545	0.622536	0.395545
KY21.Chr1.1815	KH.C1.702		0.5939	0.4596	RAE1: ribonucleic acid export 1	50.2765	51.8315	47.2756	50.3131	50.2765	51.8315	47.2756	50.3131	28.7169	48.3459	24.818	48.3459
KY21.Chr1.1816	KH.C1.528		0.9333	0.7003	TMEM214: transmembrane protein 214	6.12238	5.60832	3.53052	5.64582	6.12238	5.60832	3.53052	5.64582	6.15132	6.59048	4.26045	6.59048
KY21.Chr1.1817	KH.C1.1291		2.4163	2.1346	MMP16: matrix metallopeptidase 16	6.25238	5.84903	5.00289	6.89621	6.25238	5.84903	5.00289	6.89621	64.4578	26.6753	70.1888	26.6753
KY21.Chr1.1818	KH.C1.1123		0.3833	0.3312		493.091	485.409	312.219	423.245	493.091	485.409	312.219	423.245	135.775	354.216	131.205	354.216
KY21.Chr1.1819	KH.C1.283		0	#NUM!		1	1	1	1	0	0.117244	0	0	0	0.0413015	0.215232	0.0413015
KY21.Chr1.182	KH.C1.1155		0.444	0.4494	MTX1: metaxin 1	15.0567	15.5108	10.0466	15.5525	15.0567	15.5108	10.0466	15.5525	5.86613	13.2108	6.96708	13.2108
KY21.Chr1.1820	KH.C1.1092		0.5621	0.9311	MRS2: MRS2, magnesium transporter	1	1	1	1	0.760362	0.739983	0.510594	0.80299	0.904882	1.60977	1.64442	1.60977
KY21.Chr1.1821	KH.C1.144		0.5087	0.4369	KHDRBS3: KH RNA binding domain containing, signal transduction associated 3	13.3944	13.3562	15.5536	17.214	13.3944	13.3562	15.5536	17.214	13.9847	27.4867	9.04228	27.4867
KY21.Chr1.1822	KH.C1.689		0.4268	0.5154	LMBRD1: LMBR1 domain containing 1	2.15482	1.90579	1.07079	2.3437	2.15482	1.90579	1.07079	2.3437	0.880366	2.06251	1.10007	2.06251
KY21.Chr1.1823	KH.C1.585		0.7592	0.9253	DUOX1: dual oxidase 1	1	1	1	1	0.08967	0.0824185	0.126738	0.136284	0.204187	0.268942	0.0796321	0.268942
KY21.Chr1.1824	KH.C1.458		0.599	0.8452	D2HGDH: D-2-hydroxyglutarate dehydrogenase	1.63155	1.2657	1	1.47091	1.63155	1.2657	0.667611	1.47091	0.888532	1.48319	1.50555	1.48319
KY21.Chr1.1825	SPKH.C1.10015		0.6424	0	FCN1: ficolin 1	1	1	1	1	0	0.0862232	0	0.0846538	0.026017	0.0404984	0	0.0404984
KY21.Chr1.1826	KH.C1.32		0.6334	0.4405	ZNF609: zinc finger protein 609	1	1	3.85403	1	0.268988	0.274375	3.85403	0.509196	0.533086	0.841597	0.448405	0.841597
KY21.Chr1.1827	0		#NUM!	#NUM!		1	1	1	1	0	0	0	0	0	0	0	0
KY21.Chr1.1828	0		#NUM!	#NUM!		1	1	1	1	0	0	0	0	0	0	0	0
KY21.Chr1.1829	0		#NUM!	#NUM!		1	1	1	1	0	0	0	0	0	0	0	0
KY21.Chr1.183	KH.C1.240		0.5669	0.6085	TACC3: transforming acidic coiled-coil containing protein 3	6.68184	5.61845	3.78098	5.64958	6.68184	5.61845	3.78098	5.64958	4.26842	7.52832	4.25477	7.52832
KY21.Chr1.1830	KH.C1.1301		#NUM!	#NUM!		1	1	1	1	0	0	0	0	0	0	0	0
KY21.Chr1.1831	KH.C1.743		0.5044	0.5182	PEX16: peroxisomal biogenesis factor 16	7.84387	6.62682	5.0254	7.16481	7.84387	6.62682	5.0254	7.16481	3.90102	7.73369	3.88095	7.73369
KY21.Chr3.1611	KH.S653.4	TaGup	4.4877	7.1444		1.31675	2.2305	1.21263	1.87774	1.31675	2.2305	1.21263	1.87774	29.7631	6.63211	26.7259	6.63211
KY21.Chr1.1833	KH.C1.772		0.8061	1.7666		1.76632	2.00411	2.35681	2.3337	1.76632	2.00411	2.35681	2.3337	1.35007	1.67466	3.42239	1.67466
KY21.Chr1.1834	KH.C1.860		1.9811	1.4928	HIP1: huntingtin interacting protein 1	1.85863	1.64495	1.89958	1.64478	1.85863	1.64495	1.89958	1.64478	3.97306	2.00543	3.30849	2.00543
KY21.Chr1.1835	KH.C1.853		0.0646	0.0295	LYG2: lysozyme g2	24.9269	23.7023	9.50826	14.9636	24.9269	23.7023	9.50826	14.9636	0.808757	12.5152	0.482394	12.5152
KY21.Chr1.1836	KH.C1.378		0.6118	0.3238		1	1.15922	1	1	0.971471	1.15922	0.281652	0.184559	0.283607	0.46354	0.11503	0.46354
KY21.Chr1.1837	KH.C1.1200		0.593	1.0364		1.08552	1.17027	1.36564	1	1.08552	1.17027	1.36564	0.795442	0.488933	0.824503	0.661029	0.824503
KY21.Chr1.1838	KH.C1.1179		1.5119	1.1228	C3: complement C3	1	1	1	1	0.381921	0.33256	0.363515	0.264174	0.692393	0.457954	0.577202	0.457954
KY21.Chr1.1839	KH.C1.1233		0.9009	3.5876		39.0594	42.2067	4.71985	26.6534	39.0594	42.2067	4.71985	26.6534	16.3212	18.116	31.5944	18.116
KY21.Chr1.184	KH.C1.177		0.7639	0.8693	TMCO3: transmembrane and coiled-coil domains 3	1.16614	1.18753	1	1.2504	1.16614	1.18753	0.686569	1.2504	1.37098	1.79458	1.20849	1.79458
KY21.Chr1.1840	KH.C1.674		0.6004	0.5693	API5: apoptosis inhibitor 5	32.8056	28.4488	24.0422	28.135	32.8056	28.4488	24.0422	28.135	25.1645	41.9079	22.0228	41.9079
KY21.Chr1.1841	KH.C1.1112		0.4548	0.4793	DGUOK: deoxyguanosine kinase	79.7385	66.5159	71.7902	76.2442	79.7385	66.5159	71.7902	76.2442	36.7502	80.7891	50.6952	80.7891
KY21.Chr1.1842	KH.C1.94		0.8367	0.8627	MIB1: mindbomb E3 ubiquitin protein ligase 1	1.09347	1	1.26809	1	1.09347	0.954218	1.26809	0.979619	1.37829	1.6471	1.56893	1.6471
KY21.Chr1.1843	KH.C1.44		#NUM!	0		1	1	1	1	0	0	0.148181	0.277427	0	0	0	0
KY21.Chr1.1844	KH.C1.396		1.0197	0.9246	MTCL1: microtubule crosslinking factor 1	3.03122	2.40167	1.81702	3.57195	3.03122	2.40167	1.81702	3.57195	8.61005	8.44359	5.15098	8.44359
KY21.Chr1.1845	KH.S164.9		0.77	0.8839	UNC93A: unc-93 homolog A (C. elegans)	6.38717	5.47572	3.65606	5.09882	6.38717	5.47572	3.65606	5.09882	4.25657	5.5273	5.67968	5.5273
KY21.Chr1.1846	KH.S164.25		0.035	1.0335		17.3894	16.1548	7.59717	9.596	17.3894	16.1548	7.59717	9.596	0.4355	12.4342	27.5414	12.4342
KY21.Chr1.1847	KH.S164.3		0.6271	0.5462	ARL8A: ADP ribosylation factor like GTPase 8A	4.11997	4.27274	3.80487	5.83734	4.11997	4.27274	3.80487	5.83734	3.75831	5.99223	2.42342	5.99223
KY21.Chr1.1848	0		0.7066	0.0844		1.33375	1.05579	1.48303	1.50304	1.33375	1.05579	1.48303	1.50304	0.525649	0.743849	0.0969094	0.743849
KY21.Chr1.1849	KH.S164.10		2.1965	2.6409		8.84256	8.17558	7.36895	11.1945	8.84256	8.17558	7.36895	11.1945	21.8575	9.95096	22.2244	9.95096
KY21.Chr1.185	KH.C1.326		0.456	0.6413	AMOTL1: angiomotin like 1	3.02166	2.67198	3.79225	3.79463	3.02166	2.67198	3.79225	3.79463	2.55187	5.59574	3.48009	5.59574
KY21.Chr1.1850	KH.S164.30		0.6865	0.7494	VPS33A: VPS33A, CORVET/HOPS core subunit	3.20382	2.931	2.08994	3.09723	3.20382	2.931	2.08994	3.09723	2.23764	3.25922	2.44181	3.25922
KY21.Chr1.1851	KH.S164.5		0.6802	1.5268	SORD: sorbitol dehydrogenase	1	1	1	1	0.428645	0.430667	0.580743	0.620149	0.233909	0.343878	0.289888	0.343878
KY21.Chr1.1852	KH.S164.27		0.5523	0.7006	SORD: sorbitol dehydrogenase	5.96445	4.24929	5.19391	6.34332	5.96445	4.24929	5.19391	6.34332	4.13897	7.49324	5.5426	7.49324
KY21.Chr1.1853	KH.S164.29		0.5093	0.459		1.48193	1.18024	1.60921	1	1.48193	1.18024	1.60921	0.818857	0.626782	1.23066	0.866658	1.23066
KY21.Chr1.1854	KH.S164.14		0.5409	0.3988	POLK: DNA polymerase kappa	1	1	1	1.06469	0.651	0.640801	0.650846	1.06469	0.356964	0.65984	0.441135	0.65984
KY21.Chr1.1855	KH.S164.4		0.7952	0.7255	VPS18: VPS18, CORVET/HOPS core subunit	2.75881	2.83491	1.71982	2.32048	2.75881	2.83491	1.71982	2.32048	2.09857	2.63881	1.9916	2.63881
KY21.Chr1.1856	KH.S164.8		0.5538	0.4552	MRPL24: mitochondrial ribosomal protein L24	26.444	27.0897	13.5972	28.4289	26.444	27.0897	13.5972	28.4289	12.7788	23.0726	13.9798	23.0726
KY21.Chr1.1857	KH.S164.20		0.6934	0.9957		3.30733	3.82994	3.06938	3.70193	3.30733	3.82994	3.06938	3.70193	1.82754	2.63559	3.37918	2.63559
KY21.Chr1.1858	KH.S164.2		#NUM!	#NUM!		1	1	1	1	0.0605479	0	0	0	0	0	0	0
KY21.Chr1.1859	KH.S164.23		0.6747	0.7819	EIF4E3: eukaryotic translation initiation factor 4E family member 3	7.8545	8.08492	5.72599	8.24906	7.8545	8.08492	5.72599	8.24906	4.05908	6.01526	5.6541	6.01526
KY21.Chr1.186	KH.C1.383		1.0691	1.7412		10.7421	9.48188	16.5585	14.7188	10.7421	9.48188	16.5585	14.7188	26.4455	24.7354	26.345	24.7354
KY21.Chr1.1860	KH.S164.11		2.7292	1.4294	SLCO1C1: solute carrier organic anion transporter family member 1C1	2.12116	2.19447	2.19884	2.0468	2.12116	2.19447	2.19884	2.0468	7.0796	2.594	4.9965	2.594
KY21.Chr1.1861	SPKH.S164.10004		0	0	LRP1: LDL receptor related protein 1	1	1	1	1	0	0	0	0	0	0.138428	0	0.138428
KY21.Chr1.1862	KH.S164.31		0	0	FUT6: fucosyltransferase 6	1	1.01581	1	1	0.63329	1.01581	0.847968	0.569899	0	0.899713	0	0.899713
KY21.Chr1.1863	KH.S164.28		0.2674	0.598	FUT7: fucosyltransferase 7	13.2242	12.8318	8.67488	10.6971	13.2242	12.8318	8.67488	10.6971	3.80955	14.2429	7.70197	14.2429
KY21.Chr1.1864	KH.S164.13		0.212	0.48	FUT6: fucosyltransferase 6	2.47813	1.94051	1.77937	1.96615	2.47813	1.94051	1.77937	1.96615	0.702634	3.314	1.18269	3.314
KY21.Chr1.1865	KH.S164.18		2.0158	1.5974	UGGT1: UDP-glucose glycoprotein glucosyltransferase 1	2.10306	1.91643	2.54945	2.53534	2.10306	1.91643	2.54945	2.53534	5.70203	2.8286	4.38165	2.8286
KY21.Chr1.1866	KH.S164.24		1.1555	1.3912		633.795	567.149	533.133	630.502	633.795	567.149	533.133	630.502	413.181	357.551	705.159	357.551
KY21.Chr1.1867	KH.S164.19		1.2933	1.4892	SUOX: sulfite oxidase	2.69475	2.67562	2.69645	2.27249	2.69475	2.67562	2.69645	2.27249	2.92181	2.2591	3.19657	2.2591
KY21.Chr1.1868	KH.S164.6		#NUM!	#NUM!		1	1	1	1	0	0	0	0	0	0	0	0
KY21.Chr1.1869	KH.S164.1		0.5778	0.5319	POLD3: DNA polymerase delta 3, accessory subunit	3.13122	2.61426	3.40631	4.0311	3.13122	2.61426	3.40631	4.0311	2.59878	4.49728	2.88539	4.49728
KY21.Chr1.187	KH.C1.566		0.624	1.0227		1	1	1	1	0.396497	0.748047	0.452631	0.649689	0.44275	0.709461	0.528168	0.709461
KY21.Chr1.1870	0		#NUM!	0.4858		1	1	1	1	0	0	0.0983252	0	0	0	0.040157	0
KY21.Chr1.1871	KH.S164.12		0.3993	0.8803	SOX14: SRY-box 14	38.1081	40.1341	44.5242	43.7678	38.1081	40.1341	44.5242	43.7678	13.2637	33.2121	30.2565	33.2121
KY21.Chr1.1872	KH.S164.21		#NUM!	#NUM!		1	1	1	1	0	0	0	0	0	0	0	0
KY21.Chr1.1873	0		1.2848	3.8866		1	1	1	1	0.15861	0.0920737	0.103466	0.0451989	0.208367	0.162174	0.338051	0.162174
KY21.Chr1.1874	KH.S164.15		1.5463	1.9336	EDEM1: ER degradation enhancing alpha-mannosidase like protein 1	4.46176	4.07696	3.96155	4.60317	4.46176	4.07696	3.96155	4.60317	6.67555	4.31702	6.57081	4.31702
KY21.Chr1.1875	KH.S164.17		#NUM!	#NUM!		1	1	1	1	0	0	0.231959	0	0	0	0	0
KY21.Chr1.1876	KH.S164.32		2.5696	#NUM!		1	1	1	1	0	0.237857	0	0	0.430626	0.16758	0	0.16758
KY21.Chr1.1877	SPKH.S164.10001		0	#NUM!		1	1	1	1	0.0934712	0.0813906	0	0	0	0.0573429	0	0.0573429
KY21.Chr1.1878	KH.S164.26		0.8542	0.8526	XDH: xanthine dehydrogenase	1	1	1	1	0.416462	0.436144	0.368957	0.360847	0.536759	0.628372	0.386835	0.628372
KY21.Chr1.1879	KH.S164.16		0.5022	0.5398	YOD1: YOD1 deubiquitinase	17.1804	16.9999	13.407	14.3235	17.1804	16.9999	13.407	14.3235	7.72233	15.3743	7.94382	15.3743
KY21.Chr1.188	KH.C1.404		0.53	0.3984	EPHA4: EPH receptor A4	1.84563	1.87055	2.56088	2.08224	1.84563	1.87055	2.56088	2.08224	2.58759	4.88172	1.8298	4.88172
KY21.Chr1.1880	KH.S164.7		1.2848	1.0202		1.00593	1.38687	1	1	1.00593	1.38687	0.76556	0.52554	0.30835	0.239991	0.468994	0.239991
KY21.Chr1.1881	KH.L27.1		1.6519	2.4291		5.02205	9.21449	1.75501	1.38002	5.02205	9.21449	1.75501	1.38002	1.27238	0.770234	1.43353	0.770234
KY21.Chr1.1882	0		0.6533	1.0188		40.7033	51.8928	9.83092	17.7658	40.7033	51.8928	9.83092	17.7658	2.03059	3.10817	14.8248	3.10817
KY21.Chr1.1883	KH.L27.2		0.7709	1.6194		1	1	1	1	0.486064	0.36278	0.611498	0.356177	0.164198	0.212994	0.277491	0.212994
KY21.Chr1.1884	KH.L27.1		#NUM!	#NUM!		1.55836	2.9853	1	1	1.55836	2.9853	0.304969	0.266451	0	0	0.124552	0
KY21.Chr1.1885	KH.C1.238		0.5833	1.2955		496.373	684.819	178.59	237.708	496.373	684.819	178.59	237.708	27.7237	47.5289	134.226	47.5289
KY21.Chr1.1886	KH.C1.788		0.41	0.3305	NUDT21: nudix hydrolase 21	37.6369	44.6973	31.6983	41.9055	37.6369	44.6973	31.6983	41.9055	19.7652	48.207	15.5502	48.207
KY21.Chr1.1887	KH.C1.1181		0.3223	0.4258	HS3ST1: heparan sulfate-glucosamine 3-sulfotransferase 1	9.56227	10.4739	10.4997	10.8751	9.56227	10.4739	10.4997	10.8751	4.70651	14.5993	5.77522	14.5993
KY21.Chr1.1888	KH.C1.1245		1.5227	0.9954		14.2855	15.5106	12.5114	15.8314	14.2855	15.5106	12.5114	15.8314	4.44847	2.9213	14.7302	2.9213
KY21.Chr1.1889	KH.C1.79		0.3556	0.3549	PSMC3IP: PSMC3 interacting protein	18.8491	21.9853	13.0928	17.7058	18.8491	21.9853	13.0928	17.7058	4.4939	12.6343	5.6727	12.6343
KY21.Chr1.189	KH.C1.1083		1.6048	1.2019	EPHA4: EPH receptor A4	1	1	1	1	0.582889	0.655255	0.739345	0.485133	1.68221	1.04818	1.17085	1.04818
KY21.Chr1.1890	KH.C1.778		0.6401	0.5152	CCDC150: coiled-coil domain containing 150	1.55159	1.65211	1.08091	1.52832	1.55159	1.65211	1.08091	1.52832	0.930547	1.45368	1.00422	1.45368
KY21.Chr1.1891	KH.C1.980		1.1275	1.3861	CAPZB: capping actin protein of muscle Z-line beta subunit	37.6526	34.5832	22.2121	34.7878	37.6526	34.5832	22.2121	34.7878	37.1022	32.9051	46.183	32.9051
KY21.Chr1.1892	KH.C1.734		0.9993	0.7439	STPG1: sperm tail PG-rich repeat containing 1	1.00125	1.17956	1	1.30914	1.00125	1.17956	0.979718	1.30914	1.29988	1.30077	1.15331	1.30077
KY21.Chr1.1893	KH.C1.975		0.5075	0.367	MRPL22: mitochondrial ribosomal protein L22	39.8086	40.7895	35.3426	40.2671	39.8086	40.7895	35.3426	40.2671	21.6401	42.633	18.6514	42.633
KY21.Chr1.1894	KH.C1.227		0.2651	0.2151	UQCC2: ubiquinol-cytochrome c reductase complex assembly factor 2	16.5845	20.8244	15.875	15.5138	16.5845	20.8244	15.875	15.5138	3.69435	13.9343	5.57101	13.9343
KY21.Chr1.1895	KH.C1.977		0.397	0.571	ZNF782: zinc finger protein 782	2.94954	2.54656	2.27464	2.79939	2.94954	2.54656	2.27464	2.79939	1.08364	2.72957	1.33854	2.72957
KY21.Chr1.1896	KH.C1.950		4.9779	8.5223		6.58691	6.14303	5.88171	5.20039	6.58691	6.14303	5.88171	5.20039	22.7539	4.57091	45.1662	4.57091
KY21.Chr1.1897	KH.C1.231		4.4255	16.0323	HSPA12A: heat shock protein family A (Hsp70) member 12A	1	1	1	1	0.0604132	0.0438376	0.0886707	0.0860795	0.246033	0.0555936	0.265569	0.0555936
KY21.Chr1.1898	KH.C1.988		0.1606	0.2159	MMEL1: membrane metalloendopeptidase like 1	1	1	1	1	0.00765134	0	0.0149735	0.0130824	0.00603098	0.0375517	0.0122307	0.0375517
KY21.Chr1.1899	KH.C1.222		1.7673	2.8823	AKR1C2: aldo-keto reductase family 1 member C2	75.5828	76.2044	75.0629	79.648	75.5828	76.2044	75.0629	79.648	204.404	115.657	234.918	115.657
KY21.Chr1.19	KH.L60.11		0.9546	0.8304		1.27808	1	2.31241	1.35034	1.27808	0.965909	2.31241	1.35034	1.51112	1.58295	1.41662	1.58295
KY21.Chr1.190	KH.C1.1295		0.9825	0.6001		1	1	1	1	0.160051	0.0871033	0.0978802	0.0684143	0.102502	0.104325	0.167896	0.104325
KY21.Chr1.1900	KH.C1.346		0.5814	0.4883	PROM1: prominin 1	1.32328	1	1.2037	1.03491	1.32328	0.981546	1.2037	1.03491	0.791938	1.36203	0.752092	1.36203
KY21.Chr1.1901	KH.C1.1023		1.9993	1.9369	TM9SF2: transmembrane 9 superfamily member 2	21.4499	21.4222	15.1296	21.2628	21.4499	21.4222	15.1296	21.2628	55.9036	27.961	40.8272	27.961
KY21.Chr1.1902	KH.C1.268		0	0		1	1	1	1	0.098152	0	0	0	0	0.120429	0	0.120429
KY21.Chr1.1903	KH.C1.213		1.0476	1.719	TSHR: thyroid stimulating hormone receptor	1	1	1	1	0.356922	0.155396	0.378349	0.279707	1.24256	1.18606	0.546768	1.18606
KY21.Chr1.1904	SPKH.L144.10007		0	#NUM!		1	1	1	1	0	0	0	0	0	0.0886288	0	0.0886288
KY21.Chr1.1905	KH.C1.1143		0.3597	0		1	1	1	1	0.0610632	0.0598176	0.149375	0.0652543	0.0421152	0.117066	0	0.117066
KY21.Chr1.1906	SPKH.C1.10244		#NUM!	#NUM!		1	1	1	1	0	0	0	0	0	0	0	0
KY21.Chr1.1907	SPKH.C1.10244		#NUM!	#NUM!		1	1	1	1	0	0	0	0	0	0	0	0
KY21.Chr1.1908	SPKH.C1.10460		#NUM!	#NUM!	EML1: echinoderm microtubule associated protein like 1	1	1	1	1	0	0.0153002	0.0343865	0.0450652	0	0	0.0140438	0
KY21.Chr1.1909	SPKH.C1.10189		#NUM!	#NUM!		1	1	1	1	0.0834594	0	0	0	0	0	0	0
KY21.Chr1.191	KH.C1.1067		0.7516	0.626	NCS1: neuronal calcium sensor 1	7.27695	6.65677	5.54561	7.21374	7.27695	6.65677	5.54561	7.21374	5.67245	7.54625	5.74261	7.54625
KY21.Chr1.1910	KH.C1.1254		0.5002	0.4669	GABRR1: gamma-aminobutyric acid type A receptor rho1 subunit	1.41774	1.0001	1.47504	1.53422	1.41774	1.0001	1.47504	1.53422	1.44285	2.88451	1.2407	2.88451
KY21.Chr1.1911	KH.C1.176		0	0		1	1	1	1	0.511902	0.490316	0.60107	0.437629	0	0.973532	0	0.973532
KY21.Chr1.1912	KH.C1.1263		0.0676	0		1	1	1	1	0.526441	0.0654859	0.44153	0.32147	0.0592792	0.876611	0	0.876611
KY21.Chr1.1913	KH.C1.1263		#NUM!	#NUM!		1	1	1	1	0	0	0	0	0	0	0	0
KY21.Chr1.1914	KH.C1.801		0.0755	0.3778	GABRR1: gamma-aminobutyric acid type A receptor rho1 subunit	1.49288	2.0026	2.25038	2.20761	1.49288	2.0026	2.25038	2.20761	0.190821	2.52479	1.12869	2.52479
KY21.Chr1.1915	KH.C1.1281		1.7243	4.2336	ARHGEF26: Rho guanine nucleotide exchange factor 26	1	1	1	1	0.26838	0.280432	0.504207	0.247795	0.43155	0.250262	1.04678	0.250262
KY21.Chr1.1916	KH.C1.1258		43.0421	23.4637	B3GALT1: beta-1,3-galactosyltransferase 1	1.44873	1.72806	1.12628	1.1537	1.44873	1.72806	1.12628	1.1537	10.4807	0.243498	10.3418	0.243498
KY21.Chr1.1917	KH.C1.852		0.3051	0.4283		3.48963	2.19456	2.52932	2.70708	3.48963	2.19456	2.52932	2.70708	0.967811	3.1716	2.11765	3.1716
KY21.Chr1.1918	KH.C1.180		0.8396	0.8254	FAM13A: family with sequence similarity 13 member A	1.20974	1	1.60957	1.10358	1.20974	0.85427	1.60957	1.10358	1.25008	1.48883	1.13196	1.48883
KY21.Chr1.1919	KH.C1.180		0.7066	1.0599		2.27055	1.05445	3.99908	3.88221	2.27055	1.05445	3.99908	3.88221	1.31245	1.85725	2.90358	1.85725
KY21.Chr1.192	KH.C1.405		1.6863	0.9716	TTLL10: tubulin tyrosine ligase like 10	1	1	1	1	0.0538394	0.0527411	0.118533	0.0863019	0.111399	0.066059	0.0430312	0.066059
KY21.Chr1.1920	KH.C1.58		2.345	2.0182	REEP2: receptor accessory protein 2	5.04797	4.7403	5.14278	5.34789	5.04797	4.7403	5.14278	5.34789	17.1875	7.32919	13.6385	7.32919
KY21.Chr1.1921	KH.C1.345		0.6669	0.7386	PPP1R7: protein phosphatase 1 regulatory subunit 7	7.18491	6.99693	4.86213	7.27142	7.18491	6.99693	4.86213	7.27142	5.04584	7.56606	5.67099	7.56606
KY21.Chr1.1922	KH.C1.163		0.6065	0.669	FRK: fyn related Src family tyrosine kinase	2.03892	1.69424	1.33384	1.44427	2.03892	1.69424	1.33384	1.44427	1.70815	2.81618	1.8531	2.81618
KY21.Chr1.1923	KH.C1.723		#NUM!	#NUM!		1	1	1	1	0	0	0	0	0	0	0	0
KY21.Chr1.1924	KH.C1.500		#NUM!	#NUM!		1	1	1	1	0	0	0	0	0	0	0	0
KY21.Chr1.1925	KH.C1.323		0.4481	1.0464	FRK: fyn related Src family tyrosine kinase	1	1	1	1	0.396181	0.547905	0.182428	0.119541	0.275542	0.614774	0.782308	0.614774
KY21.Chr1.1926	KH.C1.1052		0	0.3238	ANKRD44: ankyrin repeat domain 44	1	1	1	1	0.0512178	0.0445982	0.400929	0.131359	0	0.0314212	0.0409359	0.0314212
KY21.Chr1.1927	KH.C1.798		0.4415	0.4918	TMEM86A: transmembrane protein 86A	33.9935	34.3968	37.9428	45.3349	33.9935	34.3968	37.9428	45.3349	10.0905	22.8508	18.0032	22.8508
KY21.Chr1.1928	KH.C1.558		0.6363	0.8259	LRP2BP: LRP2 binding protein	1.76682	1.09558	1	1.73932	1.76682	1.09558	0.890603	1.73932	1.09724	1.7244	1.09119	1.7244
KY21.Chr1.1929	KH.C1.377		0.995	0.9747	EDC3: enhancer of mRNA decapping 3	3.43072	3.09449	2.39351	3.53795	3.43072	3.09449	2.39351	3.53795	3.74705	3.76578	3.84865	3.76578
KY21.Chr1.193	KH.C1.842		0.4524	0.4923		10.5013	12.3757	10.3993	11.2491	10.5013	12.3757	10.3993	11.2491	5.38531	11.9016	7.61792	11.9016
KY21.Chr1.1930	KH.C1.984		0.2141	0.1518	AC011604.2	1	1	1	1	0.222161	0.193448	0.193229	0.168824	0.097285	0.454306	0.0493229	0.454306
KY21.Chr1.1931	KH.C1.744		1.193	0.6447		1	1	2.15638	1	0.621927	0.459137	2.15638	0.716626	1.24686	1.04509	0.767226	1.04509
KY21.Chr1.1932	KH.C1.204		0.5051	0.6224	KCNB1: potassium voltage-gated channel subfamily B member 1	1.64753	1.46458	2.44461	1.63973	1.64753	1.46458	2.44461	1.63973	1.65527	3.27658	1.77276	3.27658
KY21.Chr1.1933	KH.C1.207		0.2496	0.3238	TSPAN9: tetraspanin 9	1.52791	2.0087	1.81751	2.07459	1.52791	2.0087	1.81751	2.07459	0.802894	3.21639	0.83807	3.21639
KY21.Chr1.1934	KH.C1.303		0.6556	0.5219	DNAJB12: DnaJ heat shock protein family (Hsp40) member B12	15.0414	14.483	15.4964	16.4544	15.0414	14.483	15.4964	16.4544	17.0524	26.0094	11.5979	26.0094
KY21.Chr1.1935	KH.C1.1114		0.9193	0.9771	ACSS3: acyl-CoA synthetase short chain family member 3	3.15859	2.4553	2.392	2.91757	3.15859	2.4553	2.392	2.91757	3.911	4.25411	3.43372	4.25411
KY21.Chr1.1936	KH.C1.257		0	0.9716		1	1	1	1	0.106929	0.372437	0.418518	0.182829	0	0.0655992	0.25639	0.0655992
KY21.Chr1.1937	KH.C1.384		0.3847	0.358	SF3B5: splicing factor 3b subunit 5	47.9561	52.5155	34.3598	41.4142	47.9561	52.5155	34.3598	41.4142	14.1511	36.7753	17.1702	36.7753
KY21.Chr1.1938	KH.C1.1107		0.963	0.8227	RIC8A: RIC8 guanine nucleotide exchange factor A	4.57172	3.81613	3.19307	3.70624	4.57172	3.81613	3.19307	3.70624	4.871	5.05807	4.38474	5.05807
KY21.Chr1.1939	KH.C1.360		0.4977	0.4359		254.393	298.809	273.769	307.203	254.393	298.809	273.769	307.203	84.1401	169.025	105.075	169.025
KY21.Chr1.194	KH.C1.476		0.4539	0.3417		49.9288	56.1627	33.2074	49.8239	49.9288	56.1627	33.2074	49.8239	17.3667	38.2608	14.4853	38.2608
KY21.Chr1.1940	KH.C1.507		0.5919	0.4224	XKR6: XK related 6	1	1	1.14868	1	0.944698	0.74397	1.14868	0.884829	0.930794	1.57247	0.555185	1.57247
KY21.Chr1.1941	SPKH.C8.10346		#NUM!	#NUM!		1	1	1	1	0	0	0	0	0	0	0	0
KY21.Chr1.1942	KH.C1.813		0.7403	0.8283	NDC80: NDC80, kinetochore complex component	4.92391	4.31875	4.36193	5.57859	4.92391	4.31875	4.36193	5.57859	7.12173	9.61942	7.72761	9.61942
KY21.Chr1.1943	KH.C1.148		6.4241	#NUM!		2.51202	1	1	1	2.51202	0	0.64684	0	0.521064	0.0811095	0.739693	0.0811095
KY21.Chr1.1944	KH.C1.965		#NUM!	0		1	1	1	1	0	0	0.246726	0	0	0	0	0
KY21.Chr1.1945	KH.C1.22		0.9337	1.4796	UBE2D3: ubiquitin conjugating enzyme E2 D3	23.0516	30.0128	27.6039	30.7804	23.0516	30.0128	27.6039	30.7804	10.8154	11.5827	26.32	11.5827
KY21.Chr1.1946	KH.C1.72		0.5455	0.661	LRRC20: leucine rich repeat containing 20	20.6605	27.4638	24.1948	24.5212	20.6605	27.4638	24.1948	24.5212	6.58335	12.0681	7.29028	12.0681
KY21.Chr1.1947	KH.C1.273		#NUM!	#NUM!		1	1	1	1	0.221328	0	0	0	0	0	0.176896	0
KY21.Chr1.1948	KH.C1.895		0.2175	0.2223	SIAE: sialic acid acetylesterase	14.9274	15.3825	12.6713	17.0209	14.9274	15.3825	12.6713	17.0209	2.06845	9.50769	2.70532	9.50769
KY21.Chr1.1949	KH.C1.1018		0.2127	0.197		171.082	146.144	86.5341	115.095	171.082	146.144	86.5341	115.095	38.6228	181.52	34.6752	181.52
KY21.Chr1.195	KH.C1.823		0.5984	0.3984	COA4: cytochrome c oxidase assembly factor 4 homolog	24.6685	26.2688	15.3745	21.8953	24.6685	26.2688	15.3745	21.8953	8.42177	14.0734	9.16747	14.0734
KY21.Chr1.1950	KH.C1.36		14.9897	72.8744	GSTM3: glutathione S-transferase mu 3	1	1.59693	1.19634	1	0.687735	1.59693	1.19634	0.914588	6.32439	0.421913	4.58061	0.421913
KY21.Chr1.1951	KH.C1.223		2.019	5.1012		1	1	1	1	0.147495	0.0856211	0	0.168125	0.426283	0.211132	0.412598	0.211132
KY21.Chr1.1952	KH.C1.1147		0.8432	0.8227	NCSTN: nicastrin	3.50935	3.87625	2.42723	3.40293	3.50935	3.87625	2.42723	3.40293	3.35729	3.98144	3.14297	3.98144
KY21.Chr1.1953	SPKH.C1.10200	TaGdown	0	0.2242		4.50671	2.92037	6.66595	4.03202	4.50671	2.92037	6.66595	4.03202	0	0.707271	0.251302	0.707271
KY21.Chr1.1954	SPKH.C1.10358		0.4568	1.035	P4HA2: prolyl 4-hydroxylase subunit alpha 2	1	1	1	1	0.497697	0.32503	0.208711	0.395093	0.22417	0.490706	0.696124	0.490706
KY21.Chr1.1955	SPKH.S521.10001		0.8507	0.9059	CLDN19: claudin 19	4.94894	4.45639	3.9996	3.62441	4.94894	4.45639	3.9996	3.62441	3.26183	3.83397	3.34796	3.83397
KY21.Chr1.1956	KH.S521.8		0.6462	0.5496	UBE2T: ubiquitin conjugating enzyme E2 T	6.03665	6.29001	5.37586	6.95834	6.03665	6.29001	5.37586	6.95834	4.49092	6.94903	4.55374	6.94903
KY21.Chr1.1957	KH.S521.6		0.7352	0.7706	SETD9: SET domain containing 9	5.88725	6.20807	5.44353	5.95655	5.88725	6.20807	5.44353	5.95655	8.25921	11.2328	5.95729	11.2328
KY21.Chr1.1958	KH.S521.1		0.4117	0.3287		14.0705	13.5262	19.2199	23.5286	14.0705	13.5262	19.2199	23.5286	8.47331	20.5787	8.142	20.5787
KY21.Chr1.1959	0		#NUM!	#NUM!		1	1	1	1	0	0	0	0	0	0	0	0
KY21.Chr1.196	KH.C1.355		0.4818	0.6435	NDUFS7: NADH:ubiquinone oxidoreductase core subunit S7	81.0335	77.4031	70.3611	84.3739	81.0335	77.4031	70.3611	84.3739	26.1752	54.3262	34.1728	54.3262
KY21.Chr1.1960	KH.S521.9		0.3003	0.2343		13.2008	14.8339	13.3498	13.8073	13.2008	14.8339	13.3498	13.8073	4.18532	13.9347	4.42069	13.9347
KY21.Chr1.1961	KH.S521.3		0.4926	0.4111		7.46193	8.88224	7.41795	10.5869	7.46193	8.88224	7.41795	10.5869	5.50626	11.1766	4.98054	11.1766
KY21.Chr1.1962	KH.S521.10		0.7137	#NUM!		1	1	1	1	0.0808335	0	0.0790949	0	0.159288	0.223155	0	0.223155
KY21.Chr1.1963	KH.S521.2		0.9891	0.9425	MFSD5: major facilitator superfamily domain containing 5	8.13265	7.97708	5.99152	8.11594	8.13265	7.97708	5.99152	8.11594	8.46817	8.56129	8.58661	8.56129
KY21.Chr1.1964	KH.S521.7		0.6793	0.6622	PRPF18: pre-mRNA processing factor 18	12.0333	9.92517	9.91048	11.0745	12.0333	9.92517	9.91048	11.0745	6.90728	10.1676	6.95314	10.1676
KY21.Chr1.1965	KH.S521.4		1.4758	1.3373	GABARAP: GABA type A receptor-associated protein	62.2554	59.7656	54.9528	59.6919	62.2554	59.7656	54.9528	59.6919	60.0334	40.6769	64.7962	40.6769
KY21.Chr1.1966	KH.S521.5		1.4367	1.34	PLS3: plastin 3	124.658	87.0177	82.5974	102.784	124.658	87.0177	82.5974	102.784	88.3782	61.5118	83.9346	61.5118
KY21.Chr1.1967	KH.C1.623		1.2848	#NUM!		1	1.23828	1	1	0.875123	1.23828	0.749263	0.748149	0.0862243	0.067109	0.0874304	0.067109
KY21.Chr1.1968	KH.C1.948		0.5159	0.2996	HACD2: 3-hydroxyacyl-CoA dehydratase 2	9.27358	9.55649	6.96386	9.40304	9.27358	9.55649	6.96386	9.40304	2.96543	5.74798	2.75792	5.74798
KY21.Chr1.1969	KH.C1.395		0.6028	0.6675	CCDC112: coiled-coil domain containing 112	23.6119	23.3727	20.2705	27.1368	23.6119	23.3727	20.2705	27.1368	15.7144	26.067	19.0499	26.067
KY21.Chr1.197	KH.C1.1027		0.4951	0.5027	HDAC2: histone deacetylase 2	15.0948	14.6043	8.47634	14.4235	15.0948	14.6043	8.47634	14.4235	10.2797	20.759	8.81348	20.759
KY21.Chr1.1970	KH.C1.632		1.1334	1.363	CPT2: carnitine palmitoyltransferase 2	2.35655	1.74923	1.63804	2.02564	2.35655	1.74923	1.63804	2.02564	2.96386	2.6149	3.11854	2.6149
KY21.Chr1.1971	KH.C1.43		0.5116	0.6043		1.75278	2.3056	2.11648	2.39116	1.75278	2.3056	2.11648	2.39116	1.32279	2.58529	1.52014	2.58529
KY21.Chr1.1972	KH.C1.299		2.4922	1.5688	B3GNT2: UDP-GlcNAc:betaGal beta-1,3-N-acetylglucosaminyltransferase 2	3.9754	4.02805	4.4557	4.83013	3.9754	4.02805	4.4557	4.83013	10.3881	4.16819	8.06852	4.16819
KY21.Chr1.1973	KH.C1.206		0.5715	0.539	ECE2: endothelin converting enzyme 2	9.71015	7.7826	6.41218	8.95637	9.71015	7.7826	6.41218	8.95637	6.29602	11.0152	5.95783	11.0152
KY21.Chr1.1974	KH.C1.664		0.8089	0.6953	TMEM8B: transmembrane protein 8B	8.67664	7.27747	8.64608	8.91762	8.67664	7.27747	8.64608	8.91762	7.2666	8.9825	7.95464	8.9825
KY21.Chr1.1975	SPKH.C3.10404		#NUM!	#NUM!		1	1	1	1	0	0	0	0	0	0	0	0
KY21.Chr1.1976	0		#NUM!	#NUM!	ZMYM1: zinc finger MYM-type containing 1	1	1	1	1	0	0	0.0424148	0	0	0	0	0
KY21.Chr1.1977	KH.C1.454		2.1118	1.9128	STARD3: StAR related lipid transfer domain containing 3	3.15746	3.21478	3.48663	4.62863	3.15746	3.21478	3.48663	4.62863	7.80965	3.69799	8.45683	3.69799
KY21.Chr1.1978	KH.C1.789		1.032	0.8614	HIBADH: 3-hydroxyisobutyrate dehydrogenase	15.7735	14.3368	9.18268	14.1654	15.7735	14.3368	9.18268	14.1654	14.5631	14.1104	15.1854	14.1104
KY21.Chr1.1979	KH.C1.311		0.7345	0.696	PSMD3: proteasome 26S subunit, non-ATPase 3	18.773	16.5579	13.6753	18.8623	18.773	16.5579	13.6753	18.8623	14.852	20.2184	11.9177	20.2184
KY21.Chr1.198	KH.C1.970		#NUM!	#NUM!		1	1	1	1	0	0	0	0	0	0	0	0
KY21.Chr1.1980	KH.C1.924		0	#NUM!	SRR: serine racemase	1	1	1	1	0.0710996	0.309552	0.347852	0.182351	0	0.130855	0	0.130855
KY21.Chr1.1981	KH.C1.451		0.365	0.2638	ALPI: alkaline phosphatase, intestinal	1.67234	1.52362	1.86365	1.65474	1.67234	1.52362	1.86365	1.65474	0.61027	1.67192	0.507421	1.67192
KY21.Chr1.1982	KH.C1.451		0.107	0.0694		1	1	1	1	0.376625	0.196769	0.663344	0.837147	0.0593732	0.554527	0.0602036	0.554527
KY21.Chr1.1983	KH.C1.27		1.0568	1.5869	CERS6: ceramide synthase 6	8.34834	8.85331	7.36722	10.5151	8.34834	8.85331	7.36722	10.5151	5.32697	5.04026	9.56091	5.04026
KY21.Chr1.1984	KH.C1.826		1.4074	0.9194	TEP1: telomerase associated protein 1	1	1	1	1	0.425392	0.328173	0.544036	0.373241	0.708847	0.503627	0.524905	0.503627
KY21.Chr1.1985	SPKH.C1.10139		1.6702	2.6499		1	1	1.72988	2.11942	0.223528	0.141555	1.72988	2.11942	0.208225	0.124664	0.48724	0.124664
KY21.Chr1.1986	SPKH.C1.10057		1.2172	0.3932	CYP4F12: cytochrome P450 family 4 subfamily F member 12	1	1	1	1	0.295965	0.322141	0.361999	0.474417	0.262448	0.215613	0.251335	0.215613
KY21.Chr1.1987	KH.C1.828		1.2122	1.0613	WDR44: WD repeat domain 44	1	1	1	1	0.374379	0.428448	0.805919	0.420649	1.19724	0.987602	0.910493	0.987602
KY21.Chr1.1988	KH.C1.785		0.1511	0.4164	CRIM1: cysteine rich transmembrane BMP regulator 1	1.46337	1.68199	1.31734	1	1.46337	1.68199	1.31734	0.90075	0.092277	0.610469	0.280703	0.610469
KY21.Chr1.1989	KH.C1.706		0.3345	0.5346		179.053	175.021	122.444	161.34	179.053	175.021	122.444	161.34	20.6237	61.6473	41.5591	61.6473
KY21.Chr1.199	KH.C1.140		#NUM!	#NUM!		1	1	1	1	0	0	0	0	0	0	0	0
KY21.Chr1.1990	KH.C1.706		0.2155	0.3846		5.42786	8.12339	10.1717	20.2599	5.42786	8.12339	10.1717	20.2599	6.89507	31.9908	17.2948	31.9908
KY21.Chr1.1991	KH.C1.706		0.4084	0.5336		173.641	186.748	158.099	205.256	173.641	186.748	158.099	205.256	76.6934	187.783	119.495	187.783
KY21.Chr1.1992	KH.C1.799		0.352	0.5079		22.7137	23.4401	15.6809	23.7895	22.7137	23.4401	15.6809	23.7895	4.99429	14.1845	7.152	14.1845
KY21.Chr1.1993	KH.C1.747		6.0254	4.1826	SLC22A16: solute carrier family 22 member 16	1.82452	2.26794	3.85517	8.74842	1.82452	2.26794	3.85517	8.74842	4.25188	0.705653	5.82244	0.705653
KY21.Chr1.1994	SPKH.C1.10240		3.8545	#NUM!		1	1	1	1	0	0.0674057	0.151491	0.463252	0.183051	0.04749	0.0618705	0.04749
KY21.Chr1.1995	KH.C1.937		1.1057	0.71	SCLY: selenocysteine lyase	2.01281	1.44031	2.10601	2.48744	2.01281	1.44031	2.10601	2.48744	2.8118	2.543	2.42107	2.543
KY21.Chr1.1996	KH.C1.1277		0.5487	0.4714	HTRA1: HtrA serine peptidase 1	4.92668	4.55227	3.34676	4.80273	4.92668	4.55227	3.34676	4.80273	3.47825	6.33841	3.01698	6.33841
KY21.Chr1.1997	KH.C1.609		0.4344	0.3331	HELLS: helicase, lymphoid specific	21.3946	19.8526	18.0798	18.3828	21.3946	19.8526	18.0798	18.3828	13.0737	30.0952	10.86	30.0952
KY21.Chr1.1998	0		#NUM!	#NUM!		1	1	1	1	0	0	0	0	0	0	0	0
KY21.Chr1.1999	KH.C1.137		0.3387	0.3537		9.52378	9.60738	8.03731	10.1727	9.52378	9.60738	8.03731	10.1727	3.79719	11.2087	4.06323	11.2087
KY21.Chr1.2	KH.L28.1		0.9139	1.009	PSMD1: proteasome 26S subunit, non-ATPase 1	1.94305	1.67808	3.03393	1.79163	1.94305	1.67808	3.03393	1.79163	3.04559	3.33222	2.53918	3.33222
KY21.Chr1.20	KH.L60.2		0.6259	0.5947		2.43928	2.34267	1.94806	2.11603	2.43928	2.34267	1.94806	2.11603	1.34307	2.14565	1.01781	2.14565
KY21.Chr1.200	KH.C1.1062		0.3899	0.3015	KCNAB2: potassium voltage-gated channel subfamily A regulatory beta subunit 2	14.4207	13.5705	13.4778	15.5348	14.4207	13.5705	13.4778	15.5348	4.84235	12.4173	4.18649	12.4173
KY21.Chr1.2000	KH.C1.989		0.5385	0.5764	TM6SF1: transmembrane 6 superfamily member 1	4.04835	3.47212	3.18689	3.40892	4.04835	3.47212	3.18689	3.40892	1.67948	3.1185	2.55446	3.1185
KY21.Chr1.2001	KH.C1.536		0.5759	0.9514	ACOT7: acyl-CoA thioesterase 7	6.77744	5.9015	5.70582	6.58418	6.77744	5.9015	5.70582	6.58418	3.60769	6.26376	7.43941	6.26376
KY21.Chr1.2002	KH.C1.366		0.4739	1.0769		5.40115	5.73472	3.81882	5.95804	5.40115	5.73472	3.81882	5.95804	2.27973	4.80993	8.82871	4.80993
KY21.Chr1.2003	KH.C1.18		0.6513	1.4418	GLIPR1: GLI pathogenesis related 1	1.13234	1.04762	1.30189	2.0934	1.13234	1.04762	1.30189	2.0934	0.814445	1.25041	2.60195	1.25041
KY21.Chr1.2004	KH.C1.29		0.5404	0.3811		77.3339	73.3718	85.4424	81.6945	77.3339	73.3718	85.4424	81.6945	51.2154	94.7711	50.4352	94.7711
KY21.Chr1.2005	KH.C1.1243		0	6.8016		1	1	1	1	0	0.059507	0	0	0	0.125775	0.382343	0.125775
KY21.Chr1.2006	0		#NUM!	#NUM!		1	1	1	1	0	0	0	0	0	0	0	0
KY21.Chr1.2007	KH.C1.327		8.2607	10.3984		2.929	3.91313	4.56283	4.98092	2.929	3.91313	4.56283	4.98092	37.9395	4.59276	31.836	4.59276
KY21.Chr1.2008	KH.C1.477		0.6569	0.6221	UBA3: ubiquitin like modifier activating enzyme 3	3.62175	3.72255	2.71	3.55766	3.62175	3.72255	2.71	3.55766	2.5301	3.85125	2.66765	3.85125
KY21.Chr1.2009	KH.C1.935		2.298	1.6739	APOB: apolipoprotein B	1	1	2.56445	2.26297	0.643558	0.981302	2.56445	2.26297	0.504974	0.219737	0.404975	0.219737
KY21.Chr1.201	KH.C1.928		0.5103	0.4384	MRPS11: mitochondrial ribosomal protein S11	54.2331	62.2929	59.8639	80.3299	54.2331	62.2929	59.8639	80.3299	32.8535	64.3738	32.9234	64.3738
KY21.Chr1.2010	KH.C1.232		1.544	1.2891	KCNA1: potassium voltage-gated channel subfamily A member 1	4.29447	3.30327	3.89938	4.14367	4.29447	3.30327	3.89938	4.14367	9.44087	6.11421	7.45935	6.11421
KY21.Chr1.2011	KH.C1.61		1.2583	0.7337	DNASE1: deoxyribonuclease 1	1.96859	1.6812	2.61155	4.06176	1.96859	1.6812	2.61155	4.06176	2.83483	2.25282	0.559767	2.25282
KY21.Chr1.2012	KH.C1.188		0.852	0.8218		598.79	496.931	423.206	521.412	598.79	496.931	423.206	521.412	603.419	708.196	535.461	708.196
KY21.Chr1.732	SPKH.C1.10298	TaGup	4.3775	2.74		1.61805	3.78648	2.07801	3.4582	1.61805	3.78648	2.07801	3.4582	30.689	7.01054	11.3965	7.01054
KY21.Chr1.2014	SPKH.C1.10040		1.2848	0	TUBA3C: tubulin alpha 3c	1	1	1	1	0.05287	0.138111	0.0517328	0	0.0416735	0.0324348	0	0.0324348
KY21.Chr1.2015	KH.C1.561		1.1775	1.4696	TUBA1C: tubulin alpha 1c	38.9232	37.1213	32.9164	37.2997	38.9232	37.1213	32.9164	37.2997	74.1112	62.9379	73.1824	62.9379
KY21.Chr1.2016	KH.C1.1203		0	0.9716	SLC7A9: solute carrier family 7 member 9	1	1	1	1	0.0977315	0.141834	0.478147	0.222804	0	0.159884	0.104149	0.159884
KY21.Chr1.2017	KH.C1.525		1.0857	1.1734		3.48544	4.38384	3.76027	4.15125	3.48544	4.38384	3.76027	4.15125	11.271	10.3806	11.2144	10.3806
KY21.Chr1.2018	KH.C1.184		0.8736	0.7518	FBN2: fibrillin 2	1	1	1	1	0.307638	0.223231	0.928149	0.427378	0.515288	0.589783	0.665926	0.589783
KY21.Chr1.2019	KH.C1.242		0	0.0416	ACTC1: actin, alpha, cardiac muscle 1	485.494	516.294	419.51	326.555	485.494	516.294	419.51	326.555	0	2.12971	0.442756	2.12971
KY21.Chr1.202	KH.C1.928		3.9221	1.5576		1.36401	1.01083	1.23529	1.19092	1.36401	1.01083	1.23529	1.19092	2.65357	0.67656	2.43553	0.67656
KY21.Chr1.2020	KH.C1.242		0.0619	0.0468	ACTC1: actin, alpha, cardiac muscle 1	662.186	661.928	745.618	532.441	662.186	661.928	745.618	532.441	0.192496	3.10878	0.731956	3.10878
KY21.Chr1.2021	KH.C1.242		0.0155	0.0234	ACTA1: actin, alpha 1, skeletal muscle	845.672	816.14	857.965	688.323	845.672	816.14	857.965	688.323	0.194494	12.5264	0.739555	12.5264
KY21.Chr1.2022	KH.C1.698		0	0	SLC35G1: solute carrier family 35 member G1	1.34013	1	1	1	1.34013	0.933544	0.786786	0.992932	0	0.657719	0	0.657719
KY21.Chr1.2023	KH.C1.530		0.4411	0.3853	PSMB1: proteasome subunit beta 1	95.4279	100.626	83.1203	104.375	95.4279	100.626	83.1203	104.375	37.2471	84.431	37.0333	84.431
KY21.Chr1.2024	KH.C1.1167		1.0397	1.1403	SEL1L: SEL1L ERAD E3 ligase adaptor subunit	5.90022	4.94439	4.37976	5.21017	5.90022	4.94439	4.37976	5.21017	6.99065	6.72308	7.94584	6.72308
KY21.Chr1.2025	KH.C1.181		1.1186	0.6685	TECTA: tectorin alpha	19.175	17.4692	13.8474	18.4475	19.175	17.4692	13.8474	18.4475	34.5782	30.9117	13.9819	30.9117
KY21.Chr1.2026	SPKH.L34.10011		#NUM!	#NUM!	THAP12: THAP domain containing 12	1	1	1	1	0	0	0	0	0	0	0	0
KY21.Chr1.2027	KH.C1.615		0.7976	0.5016	ABCB11: ATP binding cassette subfamily B member 11	1	1	1	1	0.778134	0.909873	0.821222	0.831541	0.573916	0.719467	0.493098	0.719467
KY21.Chr1.2028	0		#NUM!	#NUM!		1	1	1	1	0	0.116419	0	0	0	0	0	0
KY21.Chr1.2029	0		#NUM!	#NUM!		1	1	1	1	0	0.0466597	0	0	0	0	0	0
KY21.Chr1.203	KH.C1.538		0.5856	0.6846	LYPLA1: lysophospholipase I	17.8269	17.2862	6.96764	16.8438	17.8269	17.2862	6.96764	16.8438	8.779	14.9893	9.20692	14.9893
KY21.Chr1.2030	KH.C1.442		0.9049	0.8848	POLDIP3: DNA polymerase delta interacting protein 3	6.92838	6.51921	6.43783	7.16146	6.92838	6.51921	6.43783	7.16146	6.68542	7.38741	6.68129	7.38741
KY21.Chr1.2031	KH.C1.654		1.885	1.4323	INPPL1: inositol polyphosphate phosphatase like 1	1	1	1	1	0.450115	0.33469	0.856124	0.410748	1.60254	0.850131	1.26925	0.850131
KY21.Chr1.2032	KH.C1.369		0.1606	0.9716		1	1	1	1	0.0342189	0.0297963	0.401795	0.029254	0.0269723	0.167942	0.136748	0.167942
KY21.Chr1.2033	0		0.0594	0.0478	GTF2IRD2: GTF2I repeat domain containing 2	7.4539	6.49053	3.51172	3.3042	7.4539	6.49053	3.51172	3.3042	0.290141	4.88333	0.514849	4.88333
KY21.Chr1.2034	KH.C1.1163		#NUM!	#NUM!		1	1	1	1	0.332378	0	0.325229	0.284153	0.130995	0	0	0
KY21.Chr1.2035	KH.C1.1020		0.4424	0.4966	MOXD1: monooxygenase DBH like 1	12.536	10.8041	9.40965	12.1505	12.536	10.8041	9.40965	12.1505	2.99311	6.76481	4.17803	6.76481
KY21.Chr1.2036	SPKH.C1.10202		0.4282	#NUM!		1	1	1	1	0	0.0809132	0.136387	0.0397203	0.0366222	0.0855099	0.0742688	0.0855099
KY21.Chr1.2037	SPKH.C1.10202		#NUM!	0		1	1	1	1	0.301778	0	0	0	0	0	0	0
KY21.Chr1.2038	KH.C1.559		1.2354	0.603	PKHD1L1: PKHD1 like 1	1	1	1	1	0.0185079	0.0177274	0.0362196	0.012658	0.036471	0.0295211	0.0266264	0.0295211
KY21.Chr1.2039	SPKH.C1.10193		1.3544	2.318	FOXRED2: FAD dependent oxidoreductase domain containing 2	2.11477	1.7766	1.71954	1.73154	2.11477	1.7766	1.71954	1.73154	3.76816	2.78204	3.1662	2.78204
KY21.Chr1.204	KH.C1.875		0.3918	0.3655	SURF1: SURF1, cytochrome c oxidase assembly factor	22.6848	26.0013	21.1399	22.6257	22.6848	26.0013	21.1399	22.6257	8.94039	22.8159	9.18878	22.8159
KY21.Chr1.2040	KH.C1.343		#NUM!	#NUM!		1	1	1	1	0	0	0	0	0	0	0	0
KY21.Chr1.2041	KH.C1.903		1.3067	2.0757	FOXRED2: FAD dependent oxidoreductase domain containing 2	13.3531	13.4265	11.7684	12.7866	13.3531	13.4265	11.7684	12.7866	19.5678	14.9744	28.5915	14.9744
KY21.Chr1.2042	KH.C1.189		1.5857	2.3239	FOXRED2: FAD dependent oxidoreductase domain containing 2	14.5774	12.1088	13.6633	14.6433	14.5774	12.1088	13.6633	14.6433	28.6804	18.086	35.3823	18.086
KY21.Chr1.2043	KH.C1.266		1.6769	2.9991	FOXRED2: FAD dependent oxidoreductase domain containing 2	83.1899	72.5512	75.8393	85.5851	83.1899	72.5512	75.8393	85.5851	179.617	107.112	209.956	107.112
KY21.Chr1.2044	KH.C1.1260		1.606	#NUM!		1	1	1	1	0.305169	0	0.149303	0.260891	0.601356	0.374432	1.46344	0.374432
KY21.Chr1.2045	KH.C1.312		1.8152	2.5608	FOXRED2: FAD dependent oxidoreductase domain containing 2	66.2907	64.9973	75.0789	85.9609	66.2907	64.9973	75.0789	85.9609	163.63	90.1416	209.859	90.1416
KY21.Chr1.2046	KH.C1.457		1.5346	1.2833	KLHL5: kelch like family member 5	4.56734	4.21606	4.64817	5.08452	4.56734	4.21606	4.64817	5.08452	7.42257	4.83681	6.60007	4.83681
KY21.Chr1.2047	KH.C1.249		0.4594	0.809	PRR11: proline rich 11	5.44194	4.18408	5.29656	4.80083	5.44194	4.18408	5.29656	4.80083	2.69233	5.86019	4.951	5.86019
KY21.Chr1.2048	KH.C1.73		0.2751	0.2132	MAPT: microtubule associated protein tau	3.93102	3.4412	3.93529	4.27395	3.93102	3.4412	3.93529	4.27395	1.40617	5.11022	1.26959	5.11022
KY21.Chr1.2049	KH.C1.581		0.7361	0.714	HERC4: HECT and RLD domain containing E3 ubiquitin protein ligase 4	7.1374	7.52849	9.27512	7.50696	7.1374	7.52849	9.27512	7.50696	9.40605	12.7769	8.07998	12.7769
KY21.Chr1.205	KH.C1.1120		0.4523	0.3506	MRPL28: mitochondrial ribosomal protein L28	46.7122	46.4517	35.3922	44.4408	46.7122	46.4517	35.3922	44.4408	17.9801	39.752	17.142	39.752
KY21.Chr1.2050	KH.C1.112		0.247	0.3151	RNF32: ring finger protein 32	1	1	1	1	0.628633	0.309392	0.427904	0.280394	0.107718	0.435958	0.26214	0.435958
KY21.Chr1.2051	KH.C1.215		0.1535	0.2841	ASIC1: acid sensing ion channel subunit 1	1.57956	1.26961	1.76434	1.45841	1.57956	1.26961	1.76434	1.45841	0.724044	4.71396	0.916743	4.71396
KY21.Chr1.2052	KH.C1.1290		1.0555	1.0971	SHMT2: serine hydroxymethyltransferase 2	19.4132	15.8699	11.4155	17.1945	19.4132	15.8699	11.4155	17.1945	12.1189	11.4806	17.7944	11.4806
KY21.Chr1.2053	KH.C1.745		#NUM!	#NUM!		1	1	1	1	0.0588608	0	0.0575948	0.0503205	0	0	0.987936	0
KY21.Chr1.2054	KH.C1.1190		1.0853	0.5256		1	1	2.09849	1.07388	0.674023	0.807	2.09849	1.07388	1.64215	1.51304	1.29169	1.51304
KY21.Chr1.2055	KH.C1.1201		0.7205	0.6285	PPIG: peptidylprolyl isomerase G	7.76611	7.50551	13.0687	8.36297	7.76611	7.50551	13.0687	8.36297	11.3264	15.7198	9.74545	15.7198
KY21.Chr1.2056	KH.C1.221		0	0		1	1	1	1	0.0446879	0.0622597	0.0174907	0	0	0.0712797	0	0.0712797
KY21.Chr1.2057	KH.C1.739		1.7131	1.2492	EPHX4: epoxide hydrolase 4	1	1	1	1	0.467266	0.327485	0.211881	0.15589	0.287463	0.167801	0.327919	0.167801
KY21.Chr1.2058	KH.C1.275		3.2355	3.0807	STAT5A: signal transducer and activator of transcription 5A	20.8491	14.4633	12.3179	15.2597	20.8491	14.4633	12.3179	15.2597	35.4922	10.9694	36.0072	10.9694
KY21.Chr1.2059	0		#NUM!	0		1	1	1	1	0.231572	0	0.566477	0	0	0	0	0
KY21.Chr1.206	KH.C1.388		1.1684	0.9344	HNRNPK: heterogeneous nuclear ribonucleoprotein K	3.83849	3.44659	2.0536	3.17925	3.83849	3.44659	2.0536	3.17925	5.31838	4.55157	3.8772	4.55157
KY21.Chr1.2060	KH.C1.835		2.0818	1.4215	ERGIC1: endoplasmic reticulum-golgi intermediate compartment 1	6.00196	5.37846	2.98395	6.07764	6.00196	5.37846	2.98395	6.07764	9.99767	4.80222	9.8115	4.80222
KY21.Chr1.2061	KH.C1.715		0.5653	0.5506		1.67306	1.25817	1.30222	1.8529	1.67306	1.25817	1.30222	1.8529	0.329687	0.583177	0.516644	0.583177
KY21.Chr1.2062	KH.C1.979		1.1088	0.8097	UBE2U: ubiquitin conjugating enzyme E2 U (putative)	26.066	27.1429	22.1528	21.2502	26.066	27.1429	22.1528	21.2502	3.33606	3.00862	2.95317	3.00862
KY21.Chr1.2063	KH.C1.83		0.6404	0.5957	RACK1: receptor for activated C kinase 1	1186.6	1358.42	664.558	1251.07	1186.6	1358.42	664.558	1251.07	565.009	882.254	668.196	882.254
KY21.Chr1.2064	KH.C1.759		1.4683	0.8935	SLC12A8: solute carrier family 12 member 8	1	1	1.13454	1	0.688716	0.592112	1.13454	0.872003	1.75915	1.19802	1.27511	1.19802
KY21.Chr1.2065	KH.C1.1296		1.1901	1.0625	PPP1R13B: protein phosphatase 1 regulatory subunit 13B	14.8217	13.2814	14.3389	11.791	14.8217	13.2814	14.3389	11.791	20.8744	17.5394	15.8844	17.5394
KY21.Chr1.2066	KH.C1.722		0.9472	0.76	CCDC57: coiled-coil domain containing 57	5.7805	5.73182	5.60205	6.66787	5.7805	5.73182	5.60205	6.66787	5.68998	6.00654	6.43273	6.00654
KY21.Chr1.2067	KH.C1.716		0.7008	0.5829	MBD4: methyl-CpG binding domain 4, DNA glycosylase	14.0993	16.9769	12.826	15.2553	14.0993	16.9769	12.826	15.2553	6.77226	9.66331	7.92344	9.66331
KY21.Chr1.2068	KH.C1.1199		0.9018	0.6943	PAQR3: progestin and adipoQ receptor family member 3	7.08088	7.40674	4.18371	8.1229	7.08088	7.40674	4.18371	8.1229	4.4936	4.9824	5.47859	4.9824
KY21.Chr1.2069	KH.C1.894		0.7844	0.6154	PPP2CA: protein phosphatase 2 catalytic subunit alpha	42.3044	41.9752	29.7832	38.0908	42.3044	41.9752	29.7832	38.0908	27.5153	35.0774	23.338	35.0774
KY21.Chr1.207	KH.C1.195		0.7168	0.7588	CCDC62: coiled-coil domain containing 62	1	1	1	1	0.48663	0.379597	0.496004	0.463693	0.423531	0.590858	0.33222	0.590858
KY21.Chr1.2070	KH.C1.482		0.8311	0.8757	FMO4: flavin containing monooxygenase 4	8.09849	8.06564	5.36726	8.22852	8.09849	8.06564	5.36726	8.22852	5.792	6.96829	5.66622	6.96829
KY21.Chr1.2071	KH.C1.683		0.407	0.4175	P4HA2: prolyl 4-hydroxylase subunit alpha 2	11.8767	11.0194	7.18902	9.86071	11.8767	11.0194	7.18902	9.86071	5.57029	13.6842	6.4693	13.6842
KY21.Chr1.2072	KH.C1.1218		0.528	0.9009	EFCAB6: EF-hand calcium binding domain 6	1	1	1	1	0.327904	0.320344	0.313026	0.239304	0.189119	0.358169	0.325999	0.358169
KY21.Chr1.2073	KH.C1.1303		0.3953	0.8097		1	1	1	1	0.124197	0.064887	0.121525	0.0424707	0.0783161	0.1981	0.198529	0.1981
KY21.Chr1.2074	KH.C1.1212		0	0.0971	DMBX1: diencephalon/mesencephalon homeobox 1	1	1	1	1	0.439879	0.282231	0.498379	0.49481	0	0.482904	0.0740156	0.482904
KY21.Chr1.2075	0		#NUM!	#NUM!		1	1	1	1	0	0	0	0	0	0	0	0
KY21.Chr1.2076	KH.C1.270		0.531	0.7066	HEPH: hephaestin	1	1	1	1	0.182432	0.204241	0.184884	0.167103	0.159205	0.299783	0.291618	0.299783
KY21.Chr1.2077	KH.C1.361		0.1511	0.1546	SULT6B1: sulfotransferase family 6B member 1	28.0691	28.6728	13.4044	23.3437	28.0691	28.6728	13.4044	23.3437	5.23481	34.6244	6.41773	34.6244
KY21.Chr1.2078	KH.C1.754		0.8898	1.3862	DMBT1: deleted in malignant brain tumors 1	1.67556	1.35426	1.37888	1.45449	1.67556	1.35426	1.37888	1.45449	1.32749	1.49181	2.2732	1.49181
KY21.Chr1.2079	KH.C1.951		0.4616	0.4213	USP5: ubiquitin specific peptidase 5	3.77517	3.16518	3.48821	3.75819	3.77517	3.16518	3.48821	3.75819	1.89434	4.10368	1.56868	4.10368
KY21.Chr1.208	SPKH.C1.10173		0	#NUM!	TRPA1: transient receptor potential cation channel subfamily A member 1	1	1	1	1	0.101661	0.0821988	0	0	0	0.0801863	0	0.0801863
KY21.Chr1.2080	KH.C1.233		0.3521	0.3254	MRPS10: mitochondrial ribosomal protein S10	52.1324	52.6294	46.6274	56.755	52.1324	52.6294	46.6274	56.755	18.4273	52.321	22.9819	52.321
KY21.Chr1.2081	KH.C1.578		0.8572	0.9001	PRCP: prolylcarboxypeptidase	19.7181	15.8083	20.3302	20.651	19.7181	15.8083	20.3302	20.651	17.0528	19.893	18.7826	19.893
KY21.Chr1.2082	KH.C1.619		1.2848	#NUM!		1	1	1	1	0.238445	0.415255	0.233317	0	0.125299	0.0975213	0	0.0975213
KY21.Chr1.2083	KH.C1.1070		1.5703	0.3778	TEX49: testis expressed 49	1	1	1	1	0.436807	0.570529	0.16028	0.420108	0.473417	0.30147	0.305479	0.30147
KY21.Chr1.2084	KH.C1.681		0.9496	0.8676		3.1509	3.39792	2.82225	3.41896	3.1509	3.39792	2.82225	3.41896	2.59825	2.73597	4.20372	2.73597
KY21.Chr1.2085	KH.C1.62		0.473	0.7082		1	1	1.20493	1	0.774395	0.51955	1.20493	0.998481	0.810529	1.71339	2.10033	1.71339
KY21.Chr1.2086	KH.C1.260		1.0512	0.3579	IL17C: interleukin 17C	1	1	1	1	0	0	0	0.0150551	0.124928	0.118839	0.0985252	0.118839
KY21.Chr1.2087	0		#NUM!	#NUM!		1	1	1	1	0	0	0	0	0.162536	0	0	0
KY21.Chr1.2088	KH.C1.890		2.4139	1.3637		1	1	1	1	0.26756	0.349469	0.430108	0.637201	0.933976	0.386909	1.22199	0.386909
KY21.Chr1.2089	KH.C1.846		0.1015	0.0815	STAC3: SH3 and cysteine rich domain 3	5.39144	4.23501	6.29614	4.78108	5.39144	4.23501	6.29614	4.78108	0.366522	3.60824	0.351559	3.60824
KY21.Chr1.209	KH.C1.603		1.8346	2.0353	TAOK3: TAO kinase 3	8.35536	6.88637	8.49447	7.05551	8.35536	6.88637	8.49447	7.05551	20.9355	11.4111	17.5191	11.4111
KY21.Chr1.2090	KH.C1.1098		0.0803	0.0947	HOXB2: homeobox B2	1	1	1	1	0.478248	0.610129	0.80533	0.532466	0.0438335	0.545854	0.0355573	0.545854
KY21.Chr1.2091	KH.C1.38		0.0101	0	HOXD3: homeobox D3	1.61181	1.6826	1.94455	1.44841	1.61181	1.6826	1.94455	1.44841	0.0288744	2.85409	0	2.85409
KY21.Chr1.2092	0		0	0		1	1	1	1	0.135897	0.118333	0.132974	0	0	0.166741	0	0.166741
KY21.Chr1.2093	KH.C1.959		0.3178	0.1421	HOXC4: homeobox C4	1.15095	1.15369	1	1.20134	1.15095	1.15369	0.838096	1.20134	0.253174	0.796399	0.128358	0.796399
KY21.Chr1.2094	KH.C1.738		0.2488	0.245	CHST1: carbohydrate sulfotransferase 1	22.9849	17.578	15.2464	18.0677	22.9849	17.578	15.2464	18.0677	3.85077	15.4739	3.44021	15.4739
KY21.Chr1.2095	KH.C1.479		1.7954	1.8753	NEB: nebulin	1.01125	1	5.89624	1	1.01125	0.695375	5.89624	0.759	0.997537	0.555607	0.885499	0.555607
KY21.Chr1.2096	KH.C1.777		0.6098	0.785	ZEB1: zinc finger E-box binding homeobox 1	3.9619	3.85474	5.22293	4.34001	3.9619	3.85474	5.22293	4.34001	3.66511	6.00996	4.04729	6.00996
KY21.Chr1.2097	KH.C1.517		1.7131	1.1659	IL17D: interleukin 17D	1	1	1	1	0.2215	0.321453	0.252858	0.378723	0.465578	0.271772	0.354068	0.271772
KY21.Chr1.2098	SPKH.C1.10281		0	#NUM!		1	1	1	1	0.181933	0.15842	0.17802	0.155536	0	0.279032	0.218116	0.279032
KY21.Chr1.2099	SPKH.C1.10384		0.4282	2.9149	ADGRE1: adhesion G protein-coupled receptor E1	1	1	1	1	0.117868	0.153951	0.230665	0.201532	0.0464532	0.108464	0.141309	0.108464
KY21.Chr1.21	KH.C1.1066		0.7736	1.0946		5.98338	5.23353	3.85038	5.39173	5.98338	5.23353	3.85038	5.39173	3.56906	4.61317	3.83439	4.61317
KY21.Chr1.210	0		#NUM!	#NUM!		1	1	1	1	0	0	0	0	0	0	0	0
KY21.Chr1.2100	KH.C1.1204		0.803	0.5804	SCNM1: sodium channel modifier 1	1.30028	1	1	1.09451	1.30028	0.958035	0.78296	1.09451	0.551876	0.687246	0.735468	0.687246
KY21.Chr1.2101	0		#NUM!	#NUM!	PLIN4: perilipin 4	1	1	1	1	0	0	0	0	0	0	0	0
KY21.Chr1.2102	KH.L65.22		0.2957	0.3213	MYO1B: myosin IB	1.82791	1.72777	1.51245	1.74087	1.82791	1.72777	1.51245	1.74087	1.43396	4.84782	1.58936	4.84782
KY21.Chr1.2103	KH.L65.3		1.5496	1.2383	CLASP1: cytoplasmic linker associated protein 1	1	1	1.46734	1	0.421133	0.33178	1.46734	0.495279	1.60354	1.0348	1.32321	1.0348
KY21.Chr1.2104	KH.L65.23		0.2527	0.2159		2.51164	2.32966	1.04182	1.4237	2.51164	2.32966	1.04182	1.4237	0.258227	1.02165	0.261839	1.02165
KY21.Chr1.2105	KH.L65.32		3.699	4.7526		1.80748	2.798	1.24457	1.63108	1.80748	2.798	1.24457	1.63108	9.41888	2.54627	12.0386	2.54627
KY21.Chr1.2106	KH.L65.24		1.5787	0.8698	NAT9: N-acetyltransferase 9 (putative)	5.71592	6.43204	5.2488	4.99935	5.71592	6.43204	5.2488	4.99935	8.00582	5.07111	7.20411	5.07111
KY21.Chr1.2107	KH.L65.8		3.6866	3.0809		3.11835	2.62924	1.67073	2.72736	3.11835	2.62924	1.67073	2.72736	8.55683	2.32102	7.33338	2.32102
KY21.Chr1.2108	KH.L65.1		1.8947	2.9923		58.9562	56.8718	50.3037	63.0549	58.9562	56.8718	50.3037	63.0549	177.686	93.7763	227.644	93.7763
KY21.Chr1.2109	KH.L65.1		1.4989	2.5191		6.12174	6.03457	6.78121	6.61596	6.12174	6.03457	6.78121	6.61596	9.55959	6.37739	19.3866	6.37739
KY21.Chr1.211	KH.C1.483		4.4448	3.5381	CAPN3: calpain 3	16.2405	10.4272	10.2599	10.9912	16.2405	10.4272	10.2599	10.9912	38.4694	8.65482	30.1699	8.65482
KY21.Chr1.2110	KH.L65.11		1.9153	1.2662		7.39418	5.78471	8.81159	5.95149	7.39418	5.78471	8.81159	5.95149	16.0856	8.39822	10.1305	8.39822
KY21.Chr1.2111	KH.L65.13		0.5865	0.6795	MIOS: meiosis regulator for oocyte development	1	1	1	1	0.584713	0.478285	0.497008	0.666501	0.391055	0.666695	0.505097	0.666695
KY21.Chr1.2112	KH.L65.30		0.3862	0.3858	HAAO: 3-hydroxyanthranilate 3,4-dioxygenase	3.87422	4.19631	4.39189	5.04893	3.87422	4.19631	4.39189	5.04893	1.71309	4.4347	2.03914	4.4347
KY21.Chr1.2113	KH.L65.18		0.4475	0.3787	IDS: iduronate 2-sulfatase	1.57029	1.58853	1.03941	1.53	1.57029	1.58853	1.03941	1.53	0.773589	1.72835	0.849008	1.72835
KY21.Chr1.2114	KH.L65.19		1.1495	0.8328	FRK: fyn related Src family tyrosine kinase	1	1	1	1	0.255229	0.277803	0.037461	0.196378	0.171002	0.14875	0.183593	0.14875
KY21.Chr1.2115	KH.L65.28		1.432	1.0101	RNF25: ring finger protein 25	3.90494	4.13037	3.49277	3.56365	3.90494	4.13037	3.49277	3.56365	4.77748	3.33622	4.02096	3.33622
KY21.Chr1.2116	KH.L65.9		0.6395	0.7127	FUCA1: fucosidase, alpha-L- 1, tissue	12.8903	13.4609	8.7733	12.5856	12.8903	13.4609	8.7733	12.5856	6.29876	9.8485	8.05961	9.8485
KY21.Chr1.2117	KH.L74.2		0.9023	1.0535	AHCTF1: AT-hook containing transcription factor 1	1	1	1.7444	1.11026	0.92089	0.822431	1.7444	1.11026	1.97598	2.18978	1.86207	2.18978
KY21.Chr1.2118	KH.L65.21		0.439	0.5117		6.25478	6.30918	4.24175	7.94146	6.25478	6.30918	4.24175	7.94146	3.31933	7.56041	4.40518	7.56041
KY21.Chr1.2119	KH.L65.21		0.8686	0.8935	MLF2: myeloid leukemia factor 2	10.3444	9.48034	8.02238	10.9497	10.3444	9.48034	8.02238	10.9497	8.4774	9.7589	7.63263	9.7589
KY21.Chr1.212	KH.C1.1188		59.1026	#NUM!	KLHL3: kelch like family member 3	1	1	1	1	0.119573	0.0780889	0.0438753	0.102223	1.08388	0.0183389	1.00347	0.0183389
KY21.Chr1.2120	KH.L65.12		0.367	#NUM!	TRIM2: tripartite motif containing 2	1	1	1	1	0.0726205	0.0316174	0	0.124168	0.0572414	0.15593	0.116084	0.15593
KY21.Chr1.2121	KH.L65.6		1.3232	1.5629	GSK3B: glycogen synthase kinase 3 beta	136.161	128.25	123.444	128.139	136.161	128.25	123.444	128.139	158.74	119.959	193.204	119.959
KY21.Chr1.2122	KH.L65.27		1.6925	1.676	CPNE8: copine 8	3.07686	2.8381	2.44592	2.71025	3.07686	2.8381	2.44592	2.71025	3.12441	1.84594	3.61585	1.84594
KY21.Chr1.2123	SPKH.L65.10020		12.2327	7.0175		1.65562	2.70308	5.80504	6.66418	1.65562	2.70308	5.80504	6.66418	24.8494	2.03139	25.0867	2.03139
KY21.Chr1.2124	KH.L65.14		0.6814	0.7234	PRMT6: protein arginine methyltransferase 6	4.16947	3.84129	3.87944	4.42381	4.16947	3.84129	3.87944	4.42381	4.22548	6.20061	4.03168	6.20061
KY21.Chr1.2125	KH.L65.15		0.7397	0.5335	TAZ: tafazzin	5.28709	5.74886	3.51894	5.1624	5.28709	5.74886	3.51894	5.1624	3.61741	4.89	3.47495	4.89
KY21.Chr1.2126	KH.L65.16		0.7157	0.6613	GTF2F1: general transcription factor IIF subunit 1	10.654	7.31136	8.29679	10.1437	10.654	7.31136	8.29679	10.1437	8.15907	11.4001	7.83313	11.4001
KY21.Chr1.2127	KH.L65.26		1.0271	1.0168	RFT1: RFT1 homolog	1.15221	1.64539	1.22406	1.41281	1.15221	1.64539	1.22406	1.41281	1.57248	1.53085	1.18402	1.53085
KY21.Chr1.2128	0		#NUM!	#NUM!	ADAT3: adenosine deaminase, tRNA specific 3	1	1	1.18097	1	0.804621	0.0500449	1.18097	0.442206	0	0	0	0
KY21.Chr1.2129	KH.L65.2		0.1104	0.0925		1.53424	1	2.25186	1.7533	1.53424	0.817927	2.25186	1.7533	0.505943	4.58128	0.300304	4.58128
KY21.Chr1.213	KH.C1.1170		0.0682	0.0765	RHBDL2: rhomboid like 2	20.0011	18.4446	12.7534	16.5514	20.0011	18.4446	12.7534	16.5514	1.90952	27.9675	2.35228	27.9675
KY21.Chr1.2130	KH.L65.31		0	0.0342		1	1	1	1	0.719387	0.675348	0.64892	0.759152	0	0.613726	0.0269518	0.613726
KY21.Chr1.2131	KH.L65.7		0.2658	0.1457		1	1	1	1	0.181215	0.101439	0.227979	0.210251	0.0612165	0.230285	0.0620727	0.230285
KY21.Chr1.2132	KH.L65.5		0.5109	0.5424	SRSF4: serine and arginine rich splicing factor 4	103.855	106.28	78.8616	104.085	103.855	106.28	78.8616	104.085	58.731	114.939	57.6293	114.939
KY21.Chr1.2133	KH.L65.17		#NUM!	#NUM!		1	1	1	1	0	0	0	0	0.943161	0	0	0
KY21.Chr1.2134	KH.L65.20		1.5517	1.8623	IFRD1: interferon related developmental regulator 1	6.41504	6.40128	7.09581	7.43442	6.41504	6.40128	7.09581	7.43442	9.81465	6.32493	16.2973	6.32493
KY21.Chr1.2135	KH.L65.4		0.1321	0.1703	SLC5A1: solute carrier family 5 member 1	1.87266	1.75606	1	1.39943	1.87266	1.75606	0.896968	1.39943	0.443855	3.35815	0.565196	3.35815
KY21.Chr1.2136	KH.L65.10		3.0751	3.0651	DYRK2: dual specificity tyrosine phosphorylation regulated kinase 2	2.30781	1.92889	4.07075	2.04555	2.30781	1.92889	4.07075	2.04555	7.03295	2.28706	6.16897	2.28706
KY21.Chr1.2137	KH.S862.1		2.1517	2.4891	CAMK1D: calcium/calmodulin dependent protein kinase ID	8.6406	7.99631	8.69367	10.3962	8.6406	7.99631	8.69367	10.3962	16.3479	7.59762	18.5389	7.59762
KY21.Chr1.2138	KH.S1196.1		1.2542	1.1041	MRC1: mannose receptor C-type 1	1	1	1	1	0.043975	0.0454711	0.0645437	0.0187973	0.088822	0.0708169	0.0549173	0.0708169
KY21.Chr1.2139	SPKH.L139.10014		#NUM!	#NUM!		1	1	1	1	0	0	0	0	0	0	0	0
KY21.Chr1.214	KH.C1.445		1.3737	1.5679	SLC10A2: solute carrier family 10 member 2	2.4079	2.27781	2.6927	3.41949	2.4079	2.27781	2.6927	3.41949	3.21583	2.34095	3.63165	2.34095
KY21.Chr1.2140	SPKH.L139.10002		0	0.1214	FEZF2: FEZ family zinc finger 2	1	1	1	1	0.0942356	0.123084	0.172891	0.241688	0	0.0578119	0.00941475	0.0578119
KY21.Chr1.2141	KH.L139.5		0.9514	1.0423	COG5: component of oligomeric golgi complex 5	1.01466	1	1.39732	1	1.01466	0.907319	1.39732	0.896646	1.52147	1.59915	1.40895	1.59915
KY21.Chr1.2142	KH.L139.24		0.3909	0.6991	GPR22: G protein-coupled receptor 22	4.06619	3.42718	5.56002	5.70456	4.06619	3.42718	5.56002	5.70456	3.94471	10.0901	4.91653	10.0901
KY21.Chr1.2143	SPKH.L139.10010		8.3514	7.2874		1	1	1	1	0.0204068	0.0177694	0.0149759	0.00436149	0.104554	0.0125192	0.0611633	0.0125192
KY21.Chr1.2144	KH.L139.4		0	#NUM!		1	1	1	1	0	0	0.0837224	0	0	0.104982	0	0.104982
KY21.Chr1.2145	KH.L139.1		0	0.1388		1	1	1	1	0.0236174	0.020565	0	0.0201907	0	0.0869333	0.0188763	0.0869333
KY21.Chr1.2146	KH.L139.11		1.1076	0.9716	SLC22A13: solute carrier family 22 member 13	1	1	1	1	0.111241	0.0440288	0.128639	0.0778095	0.199279	0.179916	0.105075	0.179916
KY21.Chr1.2147	KH.L139.26		1.4989	23.3198	HMCN1: hemicentin 1	1	1	1	1	0.0279918	0.024374	0.0912992	0.0319072	0.154447	0.103035	0.17898	0.103035
KY21.Chr1.2148	KH.L139.15		7.3664	16.842	HMCN1: hemicentin 1	1	1	1	1	0.110266	0.124819	0.496313	0.282801	0.747464	0.101469	1.37483	0.101469
KY21.Chr1.2149	KH.L139.25		7.709	#NUM!		1	1	1	1	0.338896	0	0.414508	0.0724311	0.40069	0.0519766	0.677157	0.0519766
KY21.Chr1.215	KH.C1.98		0.8809	0.8434		3.55985	3.78812	4.1463	3.97523	3.55985	3.78812	4.1463	3.97523	4.52438	5.13594	3.97545	5.13594
KY21.Chr1.2150	0		#NUM!	#NUM!		1	1	1	1	0	0	0	0.376239	0.346893	0	0	0
KY21.Chr1.2151	KH.L139.9		1.2424	2.7125	EEF1A1: eukaryotic translation elongation factor 1 alpha 1	4.35479	2.61584	4.55735	5.57446	4.35479	2.61584	4.55735	5.57446	1.61532	1.30008	1.24705	1.30008
KY21.Chr1.2152	KH.L139.14		1.0278	2.4291	EEF1A1: eukaryotic translation elongation factor 1 alpha 1	1	1	1	1	0.433128	0.377149	0.624565	0.799034	0.143749	0.139851	0.0910995	0.139851
KY21.Chr1.2153	KH.L139.2		0.3426	1.2492	EEF1A2: eukaryotic translation elongation factor 1 alpha 2	1	1	1	1	0	0.0661841	0.347073	0.194938	0.0798816	0.233147	0.182248	0.233147
KY21.Chr1.2154	SPKH.L139.10011		1.2848	#NUM!		1	1	1	1	0	0	0.115476	0	0.0465108	0.0361997	0	0.0361997
KY21.Chr1.2155	KH.L139.22		#NUM!	#NUM!		1	1	1	1	0	0	0.344928	0	0.185238	0	0	0
KY21.Chr1.2156	0		0	0		1	1	1	1	0.194995	0.169793	0.0954006	0	0	0.0598131	0	0.0598131
KY21.Chr1.2157	KH.L139.17		0.4572	0.6894	CCNB3: cyclin B3	8.72211	8.56996	7.88125	8.08258	8.72211	8.56996	7.88125	8.08258	3.83642	8.38961	5.59414	8.38961
KY21.Chr1.2158	0		#NUM!	#NUM!		1	1	1	1	0	0	0	0	0	0	0	0
KY21.Chr1.2159	0		0	#NUM!		1	1	1	1	0.123615	0	0	0.10568	0	0.0252786	0	0.0252786
KY21.Chr1.216	KH.C1.779		2.1309	1.9973	SPR: sepiapterin reductase (7,8-dihydrobiopterin:NADP+ oxidoreductase)	3.18883	2.05858	2.85126	3.24319	3.18883	2.05858	2.85126	3.24319	5.89377	2.76579	4.87764	2.76579
KY21.Chr1.2160	0		0.8565	0.4858		1.96	1	1.50688	1.55593	1.96	0.950867	1.50688	1.55593	0.264845	0.309196	0.223791	0.309196
KY21.Chr1.2161	0		#NUM!	#NUM!		1	1	1	1	0.205758	0.537495	0.603997	0.351808	0	0	0	0
KY21.Chr1.2162	KH.L139.3		0.3212	0		1	1	1	1	0.0400422	0.069734	0.0783619	0.136929	0.0315623	0.0982607	0	0.0982607
KY21.Chr1.2163	KH.L139.21		#NUM!	0.0883		1	1	1	1	0.0217504	0	0.0744891	0	0	0	0.00869203	0
KY21.Chr1.2164	KH.L139.19		0	#NUM!		1	1	1	1	0	0	0.0687477	0	0	0.0431025	0	0.0431025
KY21.Chr1.2165	KH.L139.19		0	0		1	1	1	1	0.206428	0.539246	0.201988	0.0882385	0	0.25328	0	0.25328
KY21.Chr1.2166	KH.L139.13		0.7338	0.6461	DCAF7: DDB1 and CUL4 associated factor 7	10.9816	10.6936	7.86985	9.93036	10.9816	10.6936	7.86985	9.93036	7.33928	10.0011	6.67549	10.0011
KY21.Chr1.2167	KH.L139.18		1.6292	2.305	ACE: angiotensin I converting enzyme	9.51702	8.03153	10.0839	10.6131	9.51702	8.03153	10.0839	10.6131	28.821	17.6899	35.6728	17.6899
KY21.Chr1.2168	KH.L139.10		0.7802	0.666	SLC25A44: solute carrier family 25 member 44	5.61522	5.18916	4.55507	5.46636	5.61522	5.18916	4.55507	5.46636	4.04057	5.17837	3.69172	5.17837
KY21.Chr1.2169	KH.S2583.1		2.3127	1.336		1	1.37957	1	1	0.853104	1.37957	0.715505	0.625136	0.864565	0.373832	1.07147	0.373832
KY21.Chr1.217	KH.C1.515		1.1761	0.5625	RAB12: RAB12, member RAS oncogene family	1.7393	1	1.61785	1.19322	1.7393	0.916182	1.61785	1.19322	2.01413	1.71252	1.1327	1.71252
KY21.Chr1.2170	KH.L139.12		1.5502	1.7506	ZAP70: zeta chain of T-cell receptor associated protein kinase 70	6.43199	5.98513	5.06542	7.8596	6.43199	5.98513	5.06542	7.8596	8.80915	5.68254	8.98772	5.68254
KY21.Chr1.2171	KH.L168.4		0.7549	0.5015	USP37: ubiquitin specific peptidase 37	1.26667	1	1	1	1.26667	0.875883	0.780112	0.898161	1.28033	1.69587	0.762271	1.69587
KY21.Chr1.2172	KH.L168.9		0.7377	0.8189		5.03296	3.74309	5.05943	3.90601	5.03296	3.74309	5.05943	3.90601	4.99205	6.76651	4.85402	6.76651
KY21.Chr1.2173	KH.L168.2		1.2398	1.605	DGKB: diacylglycerol kinase beta	1	1.18503	2.51533	1.16992	0.967765	1.18503	2.51533	1.16992	4.43388	3.57615	4.50194	3.57615
KY21.Chr1.2174	KH.L168.6		4.3475	3.3214		1	1.39192	1	1	0.851161	1.39192	0.7516	0.745412	15.0054	3.45143	8.67787	3.45143
KY21.Chr1.2175	KH.L168.1		0.4469	0.1943		3.15299	3.15526	1	1.00579	3.15299	3.15526	0.69071	1.00579	0.296748	0.664014	0.0376124	0.664014
KY21.Chr1.2176	KH.L168.7		0.8919	0.7958	MKRN2OS: MKRN2 opposite strand	1.55048	1.28025	1.56944	1.21124	1.55048	1.28025	1.56944	1.21124	1.76997	1.98438	1.83746	1.98438
KY21.Chr1.2177	SPKH.L168.10002		2.2241	4.7526	PKHD1L1: PKHD1 like 1	1	1	1	1	0.0732604	0.06981	0.117671	0.0886285	0.54695	0.24592	0.248576	0.24592
KY21.Chr1.2178	KH.S588.1		0.3277	0.5988		9.63975	7.472	10.5774	9.62255	9.63975	7.472	10.5774	9.62255	5.53402	16.8868	13.8059	16.8868
KY21.Chr1.2179	KH.S588.6		1.3082	1.608		22.0188	21.3162	25.1253	34.179	22.0188	21.3162	25.1253	34.179	14.6817	11.2228	34.9313	11.2228
KY21.Chr1.218	0		#NUM!	#NUM!		1	1	1	1	0	0	0	0	0	0	0	0
KY21.Chr1.2180	KH.S588.2		1.6417	0.694		1	1	2.38502	2.08379	0.635854	0.553674	2.38502	2.08379	0.960627	0.585128	0.847012	0.585128
KY21.Chr1.2181	KH.S588.4		#NUM!	0		1	1	1	1	0	0.0449371	0.201988	0.352954	0	0	0	0
KY21.Chr1.2182	KH.S588.3		#NUM!	#NUM!		1	1	1	1	0	0	0	0	0	0	0	0
KY21.Chr1.2183	SPKH.S2122.10001		0	#NUM!		1	1	1	1	0.159765	0	0.312657	0	0	0.294039	0	0.294039
KY21.Chr1.2184	KH.L132.1		0.6183	0.719	KLHL2: kelch like family member 2	1.90332	1.41563	2.08225	1.98875	1.90332	1.41563	2.08225	1.98875	1.60443	2.59478	1.56349	2.59478
KY21.Chr1.2185	KH.S1340.3		1.9272	0.6477		1	1	1	1	0	0	0.0439167	0.03837	0.106132	0.0550687	0.0717441	0.0550687
KY21.Chr1.2186	SPKH.L132.10005		#NUM!	1.9433		1	1	1	1	0.102546	0.0892926	0	0	0.0808295	0	0.16392	0
KY21.Chr1.2187	KH.L132.16		1.4428	1.5819	MATN2: matrilin 2	1096.4	809.284	1249.73	894.205	1096.4	809.284	1249.73	894.205	4135.39	2866.04	2552.72	2866.04
KY21.Chr1.2188	KH.L132.4		1.3963	1.5019	MEGF6: multiple EGF like domains 6	32.4559	22.8518	61.8285	38.1084	32.4559	22.8518	61.8285	38.1084	236.219	169.167	154.528	169.167
KY21.Chr1.2189	KH.L132.17		0	0	HOXA10: homeobox A10	2.23492	3.60874	1.95331	1.87355	2.23492	3.60874	1.95331	1.87355	0	0.665576	0	0.665576
KY21.Chr1.219	KH.C1.414		#NUM!	#NUM!	PRRX2: paired related homeobox 2	1	1	1	1	0.0161502	0.0562516	0.0632114	0	0.01273	0	0	0
KY21.Chr1.2190	KH.L132.11		1.7119	2.8896		201.219	184.876	160.498	171.42	201.219	184.876	160.498	171.42	268.322	156.736	425.958	156.736
KY21.Chr1.2191	KH.L132.13		1.6282	2.2102		26.2341	23.381	27.2805	22.7796	26.2341	23.381	27.2805	22.7796	22.3003	13.6958	17.0208	13.6958
KY21.Chr1.2192	KH.L132.15		1.3863	1.2341	SLC24A2: solute carrier family 24 member 2	1	1	1	1	0.87379	0.893565	0.715811	0.885988	2.84307	2.05072	2.55801	2.05072
KY21.Chr1.2193	KH.L132.8		0.6512	1.1783	ATG16L1: autophagy related 16 like 1	2.78036	2.543	1.73989	2.45986	2.78036	2.543	1.73989	2.45986	1.24867	1.91726	1.96381	1.91726
KY21.Chr1.2194	KH.L132.6		0.9733	0.4647	CPA2: carboxypeptidase A2	2.73532	2.35504	3.9997	3.80983	2.73532	2.35504	3.9997	3.80983	0.605633	0.622207	0.810618	0.622207
KY21.Chr1.2195	KH.L132.18		0.5256	0.5431	SPDL1: spindle apparatus coiled-coil protein 1	4.35578	4.16676	3.24159	4.96942	4.35578	4.16676	3.24159	4.96942	3.5905	6.83102	4.24137	6.83102
KY21.Chr1.2196	KH.L132.10		0.4983	0.5936	METAP1D: methionyl aminopeptidase type 1D, mitochondrial	19.0629	23.0617	18.4042	17.9919	19.0629	23.0617	18.4042	17.9919	8.45455	16.9652	12.6357	16.9652
KY21.Chr1.2197	KH.L132.18		0.4015	1.5182		3.71518	1.61751	1	1.79521	3.71518	1.61751	0	1.79521	1.90983	4.75659	1.61379	4.75659
KY21.Chr1.2198	KH.L132.12		1.0352	0.9794	PAN2: PAN2 poly(A) specific ribonuclease subunit	1.37339	1.38614	2.48917	1.49433	1.37339	1.38614	2.48917	1.49433	2.75555	2.66169	2.35128	2.66169
KY21.Chr1.2199	0		#NUM!	#NUM!		1	1	1	1	0	0	0.0837978	0	0	0	0	0
KY21.Chr1.22	SPKH.C1.10288		0.5524	0.8401	RTTN: rotatin	1	1	1.20683	1	0.11722	0.177513	1.20683	0.239638	0.530271	0.959873	0.468441	0.959873
KY21.Chr1.220	KH.C1.879		1.5418	#NUM!		1	1	1	1	0	0.018647	0	0.0183076	0.101278	0.0656879	0.0171158	0.0656879
KY21.Chr1.2200	0		0.6424	0		1	1	1	1	0.137669	0.119876	0	0.235388	0.054257	0.0844572	0	0.0844572
KY21.Chr1.2201	KH.S1340.2		0.7008	0.1943	PRKG2: protein kinase, cGMP-dependent, type II	1	1	1	1	0.0632189	0.183494	0.123718	0.306262	0.0996616	0.142207	0.0336852	0.142207
KY21.Chr1.2202	KH.S1340.3		1.5418	1.4574		1	1	1	1	0.136974	0.178907	0.0670141	0.1171	0.3239	0.210078	0.328431	0.210078
KY21.Chr1.2203	KH.S1340.1		#NUM!	#NUM!		1	1	1	1	0	0	0	0.204704	0	0	0	0
KY21.Chr1.2204	KH.L132.19		0.6211	0.4636	KLHL2: kelch like family member 2	1.64894	2.14441	2.07446	2.23353	1.64894	2.14441	2.07446	2.23353	1.72173	2.77203	1.24945	2.77203
KY21.Chr1.2205	KH.L132.3		1.4989	1.002		2.02763	1.40207	1.40049	1.68245	2.02763	1.40207	1.40049	1.68245	3.61953	2.41466	1.57292	2.41466
KY21.Chr1.2206	KH.L132.9		1.2627	1.1779	NEMF: nuclear export mediator factor	1.76153	1.41356	2.0954	1.55909	1.76153	1.41356	2.0954	1.55909	3.72984	2.95382	2.93175	2.95382
KY21.Chr1.2207	KH.L132.5		0.625	0.7023		36.1315	37.4794	25.197	40.499	36.1315	37.4794	25.197	40.499	34.2435	54.7817	41.117	54.7817
KY21.Chr1.2208	KH.L132.7		0.6533	0.5389	NDUFS6: NADH:ubiquinone oxidoreductase subunit S6	14.7427	18.0651	12.2498	14.2385	14.7427	18.0651	12.2498	14.2385	7.88726	12.0728	7.74877	12.0728
KY21.Chr1.2209	KH.S885.1		0.6207	0.6718	LTBP4: latent transforming growth factor beta binding protein 4	1	1	23.5738	2.35558	0.866689	0.902992	23.5738	2.35558	1.52425	2.45565	3.31136	2.45565
KY21.Chr1.221	KH.C1.1287		1.6702	0.5349	COL24A1: collagen type XXIV alpha 1 chain	1	1	1	1	0.0774674	0.0809462	0.261514	0.0761615	0.238141	0.142575	0.151694	0.142575
KY21.Chr1.2210	KH.S885.2		0.7709	0.1143		4.01663	3.4975	1	1.71692	4.01663	3.4975	0.32752	1.71692	2.37451	3.08016	1.0701	3.08016
KY21.Chr1.2211	KH.S1440.1		0.1529	0.0893	ACTA1: actin, alpha 1, skeletal muscle	404.699	448.84	336.201	285.242	404.699	448.84	336.201	285.242	0.291212	1.90388	0.708686	1.90388
KY21.Chr1.2212	KH.L112.31		0.7621	0.6759	MORN1: MORN repeat containing 1	1	1	1	1	0.119887	0.113091	0.29327	0.136656	0.275619	0.361613	0.12776	0.361613
KY21.Chr1.2213	KH.L112.32		0.0543	0.0559	GRK5: G protein-coupled receptor kinase 5	1.84592	1.71028	1.74393	1.79576	1.84592	1.71028	1.74393	1.79576	0.22936	4.21735	0.174426	4.21735
KY21.Chr1.2214	KH.L112.24		0.7709	0.3238	CCDC39: coiled-coil domain containing 39	1	1	1	1	0.0898773	0.0652176	0.139245	0.108852	0.0885545	0.114871	0.0718345	0.114871
KY21.Chr1.2215	0		#NUM!	#NUM!		1	1	1	1	0	0	0	0	0	0	0	0
KY21.Chr1.2216	KH.L112.5		2.5444	16.5991	VWA2: von Willebrand factor A domain containing 2	1	1	1	1	0.386817	0.421029	0.615057	0.496039	3.84935	1.51282	7.92232	1.51282
KY21.Chr1.2217	KH.L112.15		0.6169	0.4608	TRPA1: transient receptor potential cation channel subfamily A member 1	1	1	1	1	0.164854	0.217714	0.354878	0.218449	0.420146	0.680975	0.364535	0.680975
KY21.Chr1.2218	KH.L112.17		#NUM!	#NUM!		1	1	1	1	0	0	0	0	0	0	0	0
KY21.Chr1.2219	KH.L112.13		0.3455	0.3983	RNF7: ring finger protein 7	25.5068	30.4362	13.2879	22.9165	25.5068	30.4362	13.2879	22.9165	5.95708	17.2418	7.73927	17.2418
KY21.Chr1.222	KH.C1.667		0.367	0.6477		1	1	1	1	0.118087	0	0.346642	0.201907	0.186159	0.507111	0.188763	0.507111
KY21.Chr1.2220	KH.L112.26		0.6257	0.6426	B3GLCT: beta 3-glucosyltransferase	25.4019	23.8335	21.1465	23.3155	25.4019	23.8335	21.1465	23.3155	10.1664	16.248	8.2233	16.248
KY21.Chr1.2221	KH.L112.27		0.3544	1.0364	SRC: SRC proto-oncogene, non-receptor tyrosine kinase	1	1	1	1	0.372595	0.253909	0.221919	0.152342	0.102153	0.28821	0.207163	0.28821
KY21.Chr1.2222	KH.L112.19		0.4804	0.5192		6.37796	5.39764	5.89017	6.70849	6.37796	5.39764	5.89017	6.70849	5.112	10.6392	4.66802	10.6392
KY21.Chr1.2223	KH.L112.2		0.742	0.6329	MED15: mediator complex subunit 15	1.65835	1.57529	1.56903	1.3943	1.65835	1.57529	1.56903	1.3943	2.05255	2.76622	1.55547	2.76622
KY21.Chr1.2224	SPKH.L112.10015		#NUM!	#NUM!		1	1	1	1	0	0	0	0	0	0	0	0
KY21.Chr1.2225	KH.L112.16		0.9429	1.9204		2.54994	1.76324	1.24755	1.60291	2.54994	1.76324	1.24755	1.60291	2.68976	2.85262	5.03516	2.85262
KY21.Chr8.489	KH.C8.821	TaGup	4.0186	1.7778	AIFM2: apoptosis inducing factor, mitochondria associated 2	7.77621	14.4268	4.00635	8.24887	7.77621	14.4268	4.00635	8.24887	17.7628	4.42007	8.44753	4.42007
KY21.Chr1.2227	KH.S345.1		0.9511	0.5523		3.51407	3.29528	10.8004	11.9398	3.51407	3.29528	10.8004	11.9398	12.1449	12.7691	4.9331	12.7691
KY21.Chr1.2228	KH.S345.1		0.3497	0.2232		3.6537	2.79077	12.8579	15.9467	3.6537	2.79077	12.8579	15.9467	5.10305	14.5893	2.76653	14.5893
KY21.Chr1.2229	KH.S765.2		0.9636	0.3238		1	1	1	1	0.101614	0.132722	0.0497144	0.0434354	0.120143	0.124677	0.0406077	0.124677
KY21.Chr1.223	KH.C1.553		38.3738	55.8051	OLFM2: olfactomedin 2	3.01963	4.09573	2.65164	3.07794	3.01963	4.09573	2.65164	3.07794	68.353	1.78124	59.5316	1.78124
KY21.Chr1.2230	KH.S765.3		0.0523	0.0413	HOXB5: homeobox B5	6.55233	9.0511	4.85051	5.39634	6.55233	9.0511	4.85051	5.39634	0.121682	2.32555	0.109674	2.32555
KY21.Chr1.2231	SPKH.S765.10001		#NUM!	0.2429	HOXB7: homeobox B7	1	1	1	1	0.0666621	0	0	0	0	0	0.0532798	0
KY21.Chr1.2232	KH.S659.1		1.4686	1.4802	ACOX1: acyl-CoA oxidase 1	2.25214	2.09495	1.92049	2.12641	2.25214	2.09495	1.92049	2.12641	5.06893	3.45134	4.22898	3.45134
KY21.Chr1.2233	KH.S659.3		1.0512	1.7718	WDR66: WD repeat domain 66	1	1	1	1	0.093874	0.0668793	0.150308	0.131324	0.302702	0.28795	0.211445	0.28795
KY21.Chr1.2234	KH.S659.2		0.6897	0.9339		6.73387	5.88206	7.71146	7.30047	6.73387	5.88206	7.71146	7.30047	4.63806	6.72446	6.31585	6.72446
KY21.Chr1.2235	KH.S659.4		0.2336	0.1943		1	1	1	1	0.40682	0.295201	0.26538	0.173897	0.106889	0.457557	0.0541919	0.457557
KY21.Chr1.2236	SPKH.S659.10005		1.1012	0.1295		1	1	1	1	0.686709	0.256267	0.191983	0.251603	0.463956	0.421284	0.156815	0.421284
KY21.Chr1.2237	SPKH.S659.10002		#NUM!	0		1	1	1	1	0.103551	0.090168	0.607945	0	0	0	0	0
KY21.Chr1.2238	SPKH.S765.10002		1.1135	0.3737	RXFP2: relaxin/insulin like family peptide receptor 2	1	1	1	1	0.0258175	0	0.0252622	0.0220716	1.32275	1.1879	0.103174	1.1879
KY21.Chr1.2239	KH.S1231.1		0.2732	0.3447	IFT27: intraflagellar transport 27	3.59532	3.75677	3.86979	4.24166	3.59532	3.75677	3.86979	4.24166	1.04855	3.83785	0.948276	3.83785
KY21.Chr1.224	KH.C1.470		0.9344	1.388	C9orf116: chromosome 9 open reading frame 116	1	1.07799	1	1	0.618997	1.07799	0.778735	0.982772	0.557611	0.59674	0.706763	0.59674
KY21.Chr1.2240	KH.S1231.2		0.367	0.1943	FAM166B: family with sequence similarity 166 member B	1	1	1	1	0.231996	0.35352	0.340509	0.297502	0.0914325	0.249069	0.0463557	0.249069
KY21.Chr1.2241	SPKH.S1231.10001		0.7066	2.9149	DNASE1: deoxyribonuclease 1	1	1	1	1	0.380139	0.286874	0.371963	0.34665	0.439466	0.62189	0.546889	0.62189
KY21.Chr1.2242	KH.L112.23		0.5743	0.6246	ZNF598: zinc finger protein 598	1	1	1	1	0.465011	0.508293	0.484053	0.380625	0.296347	0.515925	0.142338	0.515925
KY21.Chr1.2243	0		#NUM!	#NUM!		1	1	1	1	0	0	0	0	0	0	0	0
KY21.Chr1.2244	KH.L112.6		0.6735	0.6568	AKR7L: aldo-keto reductase family 7 like (gene/pseudogene)	7.65646	7.55583	6.87481	8.06003	7.65646	7.55583	6.87481	8.06003	4.35468	6.46542	4.65557	6.46542
KY21.Chr1.2245	KH.L112.28		0.3912	0.5919	AC084337.2	18.5866	21.3517	12.8732	21.2502	18.5866	21.3517	12.8732	21.2502	7.45759	19.0614	12.976	19.0614
KY21.Chr1.2246	KH.L112.8		1.011	0.8385	DEF8: differentially expressed in FDCP 8 homolog	1.23094	1.23998	1.33436	1.21742	1.23094	1.23998	1.33436	1.21742	2.17833	2.15443	1.21532	2.15443
KY21.Chr1.2247	KH.L112.30		0.035	0.037		75.6626	112.91	63.543	112.039	75.6626	112.91	63.543	112.039	2.04179	58.1884	2.55183	58.1884
KY21.Chr1.2248	KH.L112.10		0.5719	1.6488		2.90408	2.79848	3.94038	2.78064	2.90408	2.79848	3.94038	2.78064	2.10595	3.68197	5.19924	3.68197
KY21.Chr1.2249	KH.L112.34		0.2569	0.1494	SHOX: short stature homeobox	1	1	1	1	0.0682414	0.415951	0.200321	0.11668	0.215158	0.837297	0.109084	0.837297
KY21.Chr1.225	KH.C1.101		0.7164	0.7811	CDIPT: CDP-diacylglycerol--inositol 3-phosphatidyltransferase	16.1223	16.2693	12.1993	15.5352	16.1223	16.2693	12.1993	15.5352	8.99255	12.552	12.2033	12.552
KY21.Chr1.2250	KH.L112.11		0.4342	0.4481		3.58408	4.38552	2.77351	3.56472	3.58408	4.38552	2.77351	3.56472	1.79106	4.12449	2.22801	4.12449
KY21.Chr1.2251	KH.L112.29		0.6243	1.1968		7.19001	7.10353	5.47946	6.56052	7.19001	7.10353	5.47946	6.56052	3.76007	6.02263	5.58086	6.02263
KY21.Chr1.2252	KH.L112.14		0.5074	0.6969	PARK7: Parkinsonism associated deglycase	32.6052	37.2551	19.1723	23.425	32.6052	37.2551	19.1723	23.425	9.41136	18.5471	12.724	18.5471
KY21.Chr1.2253	KH.L112.1		0.4515	0.5042	SNRPC: small nuclear ribonucleoprotein polypeptide C	109.724	139.682	91.5313	122.01	109.724	139.682	91.5313	122.01	65.0646	144.088	74.8656	144.088
KY21.Chr1.2254	KH.L112.9		0.8367	1.0216	OSBPL11: oxysterol binding protein like 11	6.07182	6.08861	8.33156	6.23506	6.07182	6.08861	8.33156	6.23506	7.84173	9.3721	7.80993	9.3721
KY21.Chr1.2255	KH.L112.21		0.5618	0.6164	BPNT1: 3'(2'), 5'-bisphosphate nucleotidase 1	29.0976	32.066	26.3885	32.0891	29.0976	32.066	26.3885	32.0891	13.7675	24.5026	12.416	24.5026
KY21.Chr1.2256	KH.L112.4		0.5316	0.5847		20.1127	23.0897	16.1553	20.1886	20.1127	23.0897	16.1553	20.1886	7.57177	14.2418	10.3969	14.2418
KY21.Chr1.2257	KH.L112.12		0.933	1.0194	CHSY3: chondroitin sulfate synthase 3	5.76122	6.60585	4.8412	5.73367	5.76122	6.60585	4.8412	5.73367	6.62106	7.0958	5.62402	7.0958
KY21.Chr1.2258	KH.L112.3		0.7752	0.6348	DNAJC1: DnaJ heat shock protein family (Hsp40) member C1	6.04395	6.46354	6.51683	6.89772	6.04395	6.46354	6.51683	6.89772	6.6141	8.53167	7.29285	8.53167
KY21.Chr1.2259	KH.L112.33		0.4975	0.6404		14.1074	14.982	12.1914	11.6097	14.1074	14.982	12.1914	11.6097	4.10498	8.25022	4.58391	8.25022
KY21.Chr1.226	KH.C1.82		0.5215	0.498		106.71	118.309	61.111	98.5938	106.71	118.309	61.111	98.5938	32.6014	62.5044	36.9692	62.5044
KY21.Chr1.2260	KH.L112.22		5.0365	10.1052		1	1	1	1	0.692859	0.844635	0.723153	0.552841	3.56804	0.708427	3.83946	0.708427
KY21.Chr1.2261	KH.L112.7		0.8731	0.9525	MBOAT7: membrane bound O-acyltransferase domain containing 7	12.3983	11.5755	10.1319	12.5962	12.3983	11.5755	10.1319	12.5962	10.7392	12.2988	11.6206	12.2988
KY21.Chr1.2262	KH.L112.25		0.9655	0.8232	SMC3: structural maintenance of chromosomes 3	3.31316	2.4457	5.33207	3.22643	3.31316	2.4457	5.33207	3.22643	7.82473	8.10351	5.54994	8.10351
KY21.Chr1.2263	KH.S605.4		1.0409	0.8227	PPIB: peptidylprolyl isomerase B	307.902	328.65	210.385	246.068	307.902	328.65	210.385	246.068	226.369	217.46	188.659	217.46
KY21.Chr1.2264	KH.S605.1		0.7274	1.1186		2.35655	1.91959	1.87816	2.12836	2.35655	1.91959	1.87816	2.12836	1.85749	2.5533	2.08094	2.5533
KY21.Chr1.2265	KH.S605.6		#NUM!	0		1	1	1	1	0	0	0	0	0	0	0	0
KY21.Chr1.2266	KH.S605.5		1.4442	1.15	MRC1: mannose receptor C-type 1	1	1	5.05018	1.17336	0.621916	0.672253	5.05018	1.17336	3.36949	2.33306	3.05668	2.33306
KY21.Chr1.2267	KH.S605.2		2.6404	4.1731		1.12911	1.47477	1.55201	1.0802	1.12911	1.47477	1.55201	1.0802	5.53067	2.09456	7.19805	2.09456
KY21.Chr1.2268	KH.S605.3		37.4134	52.061	CRYGN: crystallin gamma N	137.288	177.278	124.239	162.372	137.288	177.278	124.239	162.372	1306.93	34.932	1517.86	34.932
KY21.Chr1.2269	SPKH.S605.10001		3.212	1.4574	CUBN: cubilin	1	1	1	1	0.00828989	0.0144369	0.15412	0.0212613	0.163358	0.050857	0.119263	0.050857
KY21.Chr1.227	KH.C1.246		1.1206	1.441	CYP20A1: cytochrome P450 family 20 subfamily A member 1	5.85549	5.60857	3.97487	5.85065	5.85549	5.60857	3.97487	5.85065	6.79337	6.0619	7.67814	6.0619
KY21.Chr1.2270	SPKH.S605.10001		3.8545	2.9149	CUBN: cubilin	1	1	1	1	0.0756247	0.0658506	0.295992	0	0.178828	0.0463944	0.543988	0.0463944
KY21.Chr1.228	KH.C1.59		0.5174	0.4878	HADHB: hydroxyacyl-CoA dehydrogenase/3-ketoacyl-CoA thiolase/enoyl-CoA hydratase (trifunctional protein), beta subunit	15.821	15.3774	14.2625	17.2753	15.821	15.3774	14.2625	17.2753	8.09227	15.6399	7.39409	15.6399
KY21.Chr1.229	KH.C1.933		0.6887	0.5832	HADHA: hydroxyacyl-CoA dehydrogenase/3-ketoacyl-CoA thiolase/enoyl-CoA hydratase (trifunctional protein), alpha subunit	6.74524	6.12091	5.07893	6.10954	6.74524	6.12091	5.07893	6.10954	3.52475	5.11748	3.19995	5.11748
KY21.Chr1.23	KH.C1.335		0.9747	0.9514	TMCC1: transmembrane and coiled-coil domain family 1	6.28446	4.99815	6.3776	5.60535	6.28446	4.99815	6.3776	5.60535	4.85548	4.98148	5.27152	4.98148
KY21.Chr1.230	KH.C1.983		1.9761	1.8313	KLF10: Kruppel like factor 10	11.8285	15.221	19.3405	22.8384	11.8285	15.221	19.3405	22.8384	29.9911	15.1763	29.0776	15.1763
KY21.Chr1.231	0		#NUM!	#NUM!		1	1	1	1	0.0440297	0	0.0430827	0.0376413	0	0	0.105572	0
KY21.Chr1.232	KH.C1.535		#NUM!	#NUM!		1	1	1	1	0	0	0.166248	0	0	0	0.0678972	0
KY21.Chr1.233	KH.C1.535		0.9171	1.3648	MASTL: microtubule associated serine/threonine kinase like	1	1	1.1135	1	0.420277	0.501082	1.1135	0.503017	1.18239	1.28916	1.25578	1.28916
KY21.Chr1.234	KH.C1.1221		1.6445	5.7489		3.04151	2.91775	2.67344	2.73243	3.04151	2.91775	2.67344	2.73243	1.30029	0.790642	8.77609	0.790642
KY21.Chr1.235	KH.C1.936		1.2765	1.3203	ERLEC1: endoplasmic reticulum lectin 1	20.7699	16.7644	12.286	16.8394	20.7699	16.7644	12.286	16.8394	25.2993	19.819	22.2453	19.819
KY21.Chr1.236	KH.C1.191		#NUM!	#NUM!		1	1	1.35829	1	0	0	1.35829	0	0	0	0	0
KY21.Chr1.237	KH.C1.68		0.7563	0.7645	PSTK: phosphoseryl-tRNA kinase	5.51407	4.85142	3.9904	3.4373	5.51407	4.85142	3.9904	3.4373	3.75777	4.96846	4.40713	4.96846
KY21.Chr1.238	KH.C1.309		0.7865	0.8362	SNF8: SNF8, ESCRT-II complex subunit	32.6443	35.7779	27.3425	35.4988	32.6443	35.7779	27.3425	35.4988	27.5151	34.98	29.2219	34.98
KY21.Chr1.239	KH.C1.199		1.0411	0.9846	BBS1: Bardet-Biedl syndrome 1	6.54538	6.29588	7.74509	8.52367	6.54538	6.29588	7.74509	8.52367	8.45875	8.12433	9.2462	8.12433
KY21.Chr1.24	KH.C1.56		1.4454	5.3441		1	1	1.31239	1	0.838273	0.291973	1.31239	0.573317	1.18935	0.822825	1.47398	0.822825
KY21.Chr1.240	KH.C1.991		0.8238	1.0942	HMCES: 5-hydroxymethylcytosine binding, ES cell specific	3.04953	2.56833	1.49197	2.58569	3.04953	2.56833	1.49197	2.58569	1.65502	2.00884	2.49727	2.00884
KY21.Chr1.241	KH.C1.449		1.2134	0.7159		1.18768	1.59105	1.16214	2.18692	1.18768	1.59105	1.16214	2.18692	0.612106	0.50443	1.53341	0.50443
KY21.Chr1.242	KH.C1.317		2.291	2.2023	SPTLC2: serine palmitoyltransferase long chain base subunit 2	135.554	134.934	96.9316	123.244	135.554	134.934	96.9316	123.244	260.742	113.811	291.56	113.811
KY21.Chr1.243	SPKH.C1.10079		0.4588	0.4858		1	1	1	1	0.176692	0.410281	0.230522	0.402814	0.232122	0.505854	0.0941475	0.505854
KY21.Chr1.244	KH.C1.1152		8.1587	3.4484		3.66935	3.434	2.81865	3.95784	3.66935	3.434	2.81865	3.95784	3.43289	0.420763	4.96098	0.420763
KY21.Chr1.245	KH.C1.863		0.9145	1.0245	NAT1: N-acetyltransferase 1	4.83059	5.22597	1.94797	3.75428	4.83059	5.22597	1.94797	3.75428	4.73065	5.17262	5.89658	5.17262
KY21.Chr1.246	KH.C1.1284		0.458	0.6595	SMIM15: small integral membrane protein 15	66.8816	65.4311	49.4976	57.6613	66.8816	65.4311	49.4976	57.6613	24.2627	52.9719	38.8025	52.9719
KY21.Chr1.247	KH.C1.787		0.8096	0.7499	TANC2: tetratricopeptide repeat, ankyrin repeat and coiled-coil containing 2	1	1	3.00631	1	0.81678	0.857227	3.00631	0.70752	2.8481	3.51751	1.9887	3.51751
KY21.Chr1.248	KH.C1.677		1.2792	1.3597	KDM5A: lysine demethylase 5A	1.59097	1.35899	2.44088	1.53014	1.59097	1.35899	2.44088	1.53014	3.93251	3.07396	3.38973	3.07396
KY21.Chr1.249	KH.C1.1081		0.5295	0.4545	DIS3: DIS3 homolog, exosome endoribonuclease and 3'-5' exoribonuclease	26.0012	23.6368	21.9818	22.7621	26.0012	23.6368	21.9818	22.7621	14.4283	27.2447	11.4714	27.2447
KY21.Chr1.25	KH.C1.1214		1.606	0.2429		1	1	1	1	0.0691347	0.0601994	0.0676477	0.0886556	0.272469	0.169652	0.027628	0.169652
KY21.Chr1.250	KH.C1.63		0.5729	0.5276	SEH1L: SEH1 like nucleoporin	9.94476	9.66481	6.91403	13.1476	9.94476	9.66481	6.91403	13.1476	5.20559	9.08529	5.8936	9.08529
KY21.Chr1.251	KH.C1.1122		#NUM!	#NUM!	CYP2U1: cytochrome P450 family 2 subfamily U member 1	1	1	1	1	0.0607931	0.0352907	0.0198285	0	0	0	0	0
KY21.Chr1.252	KH.C1.1158		#NUM!	#NUM!		1	1	1	1	0	0	0.186928	0.0326638	0.0602323	0	0.152687	0
KY21.Chr1.253	KH.C1.1158		#NUM!	#NUM!		1	1	1	1	0.381768	0	0	0	0	0	0	0
KY21.Chr1.254	KH.C1.99		0.2674	0.2339	SOX2: SRY-box 2	26.0429	25.163	45.2567	31.4331	26.0429	25.163	45.2567	31.4331	10.3715	38.7769	10.2784	38.7769
KY21.Chr1.255	KH.C1.1053		#NUM!	#NUM!		1	1	1	1	0	0	0.0378266	0	0.0914139	0	0	0
KY21.Chr1.256	KH.C1.89		0.8789	0.7133	MPDU1: mannose-P-dolichol utilization defect 1	1.51037	1.7248	1.46577	1.69341	1.51037	1.7248	1.46577	1.69341	1.65891	1.88734	1.83053	1.88734
KY21.Chr1.257	KH.C1.633		1.2166	1.2692	PICALM: phosphatidylinositol binding clathrin assembly protein	39.6366	35.4597	41.1697	39.8496	39.6366	35.4597	41.1697	39.8496	57.6713	47.4035	52.4199	47.4035
KY21.Chr1.258	KH.C1.4		0.2595	0.1804	EFNB3: ephrin B3	1.45848	1.40654	2.03581	1.21335	1.45848	1.40654	2.03581	1.21335	0.545964	2.10379	0.353051	2.10379
KY21.Chr1.259	KH.C1.898		0.7945	0.8114	B4GALT2: beta-1,4-galactosyltransferase 2	12.2811	9.48802	8.41544	8.97262	12.2811	9.48802	8.41544	8.97262	8.70365	10.9548	9.07297	10.9548
KY21.Chr1.26	KH.C1.1039		0.0528	0.0699	PRSS12: protease, serine 12	2.63958	3.34039	5.64774	2.73801	2.63958	3.34039	5.64774	2.73801	0.540953	10.2342	0.407874	10.2342
KY21.Chr1.260	KH.C1.628		0.7236	0.4574		5.35298	5.47554	4.61476	6.05637	5.35298	5.47554	4.61476	6.05637	4.47033	6.17726	4.3579	6.17726
KY21.Chr1.261	KH.C1.884		0.4634	0.5042		4.78507	4.5615	4.14661	6.0025	4.78507	4.5615	4.14661	6.0025	2.21866	4.78706	3.92446	4.78706
KY21.Chr1.262	KH.C1.484		0.7146	0.5074		34.0607	30.6247	24.4911	29.229	34.0607	30.6247	24.4911	29.229	16.2916	22.7952	17.9425	22.7952
KY21.Chr1.263	KH.C1.574		0.7369	0.3889		115.48	111.458	83.2223	118.531	115.48	111.458	83.2223	118.531	89.5799	121.549	54.9635	121.549
KY21.Chr1.264	KH.C1.733		1.1333	0.3011		110.866	103.956	110.401	140.973	110.866	103.956	110.401	140.973	54.5179	48.1052	83.8166	48.1052
KY21.Chr1.265	KH.C1.100		0	0.9716		1	1	1	1	0.601647	0.392916	0.294353	0.128588	0	0.3691	0.120217	0.3691
KY21.Chr1.266	KH.C1.1279		0	0.1943		1	1	1	1	0.158831	0.276606	0.155415	0.339464	0	0.292319	0.0634728	0.292319
KY21.Chr1.267	KH.C1.1268		#NUM!	#NUM!		1	1	1	1	0.10574	0	0	0	0	0	0	0
KY21.Chr1.268	KH.C1.1192		#NUM!	#NUM!		1	1	1	1	0	0.0831067	0	0	0	0	0	0
KY21.Chr1.269	KH.C1.1192		#NUM!	#NUM!		1	1	1	1	0	0	0	0	0	0	0	0
KY21.Chr1.27	KH.C1.1256		0.2569	#NUM!		1	1	1	1	0.331605	0.144374	0	0.0472486	0.0435633	0.169528	0	0.169528
KY21.Chr1.270	KH.C1.1192		#NUM!	#NUM!		1	1	1	1	0	0	0	0.0860886	0	0	0	0
KY21.Chr1.271	KH.C1.187		0.8734	1.0119	TNFAIP8: TNF alpha induced protein 8	33.9021	30.1053	34.8333	41.8276	33.9021	30.1053	34.8333	41.8276	23.4902	26.8925	35.488	26.8925
KY21.Chr1.272	KH.C1.546		1.2879	1.343	FBXL20: F-box and leucine rich repeat protein 20	2.87244	2.64202	2.9689	3.69997	2.87244	2.64202	2.9689	3.69997	5.03209	3.90706	4.87474	3.90706
KY21.Chr1.273	KH.C1.546		#NUM!	#NUM!		1	1	1	1	0	0	0	0	0	0	0	0
KY21.Chr1.274	KH.C1.1012		0.929	0.8704	CHMP5: charged multivesicular body protein 5	29.7319	27.0471	17.9826	27.0795	29.7319	27.0471	17.9826	27.0795	23.9998	25.833	25.3166	25.833
KY21.Chr1.275	KH.C1.1109		0.4539	0.5047		1	1	1	1	0.512957	0.304541	0.878367	0.697662	0.487029	1.07281	0.37271	1.07281
KY21.Chr1.276	KH.C1.158		5.1527	1.6758	GCLC: glutamate-cysteine ligase catalytic subunit	1.23896	1.29634	1	1.0592	1.23896	1.29634	0.850574	1.0592	3.03213	0.588449	1.50133	0.588449
KY21.Chr1.277	KH.C1.158		2.2943	1.978	GCLC: glutamate-cysteine ligase catalytic subunit	1	1	1	1	0.323491	0.354114	0.37984	0.339768	0.364263	0.158765	0.421068	0.158765
KY21.Chr1.278	KH.C1.805		3.212	#NUM!		1	1	1	1	0.155454	0.0676813	0.228166	0.0332247	0.153166	0.0476842	0	0.0476842
KY21.Chr1.279	KH.C1.749		0.6097	0.5951	MASP1: mannan binding lectin serine peptidase 1	2.0026	2.04176	1.66188	1.83123	2.0026	2.04176	1.66188	1.83123	0.559469	0.917532	0.992766	0.917532
KY21.Chr1.28	KH.C1.636		2.2637	5.1012		1	1	1	1	0.275682	0.458281	0.564028	0.342811	1.46184	0.645754	4.62713	0.645754
KY21.Chr1.280	KH.C1.481		0.7608	0.716	HPGDS: hematopoietic prostaglandin D synthase	14.6747	17.0065	9.55532	16.6605	14.6747	17.0065	9.55532	16.6605	16.4041	21.5606	21.581	21.5606
KY21.Chr1.281	SPKH.S1062.10001		#NUM!	#NUM!	RTL1: retrotransposon Gag like 1	1	1	1	1	0	0	0	0	0	0	0	0
KY21.Chr1.282	KH.C1.1014		0.3376	0.279		15.6114	16.4509	14.7891	15.4715	15.6114	16.4509	14.7891	15.4715	3.21348	9.51628	6.75528	9.51628
KY21.Chr1.283	KH.C1.540		0.4496	0.5097	MBLAC1: metallo-beta-lactamase domain containing 1	6.78121	7.30045	3.378	4.53244	6.78121	7.30045	3.378	4.53244	2.04087	4.53834	3.15339	4.53834
KY21.Chr1.284	KH.C1.637		1.9147	1.7411	DLG2: discs large MAGUK scaffold protein 2	2.72834	3.15986	2.54191	3.29982	2.72834	3.15986	2.54191	3.29982	6.68123	3.48929	5.46095	3.48929
KY21.Chr1.285	KH.C1.867		0.367	0.7474	CFAP100: cilia and flagella associated protein 100	2.12572	1.48385	1.0486	1.14144	2.12572	1.48385	1.0486	1.14144	0.387731	1.05621	0.561648	1.05621
KY21.Chr1.286	KH.C1.119		1.0706	0.694		1	1	1	1	0.202934	0.0757312	0.198569	0.123921	0.228512	0.213423	0.115854	0.213423
KY21.Chr1.287	KH.C1.746		5.6992	4.9141	TMEM26: transmembrane protein 26	2.06625	2.00035	3.2148	4.0376	2.06625	2.00035	3.2148	4.0376	16.0641	2.81865	13.5398	2.81865
KY21.Chr1.288	KH.C1.220		0.4132	0.2826	MRPS25: mitochondrial ribosomal protein S25	6.92458	7.35968	4.38424	6.18104	6.92458	7.35968	4.38424	6.18104	2.38793	5.77867	2.2789	5.77867
KY21.Chr1.289	KH.C1.670		0.6363	0.6651	ATP5C1: ATP synthase, H+ transporting, mitochondrial F1 complex, gamma polypeptide 1	41.2798	45.4389	29.212	41.8023	41.2798	45.4389	29.212	41.8023	21.4982	33.7847	22.5844	33.7847
KY21.Chr1.29	KH.C1.159		3.0607	3.5981	HES1: hes family bHLH transcription factor 1	6.70231	8.41998	6.85852	8.26673	6.70231	8.41998	6.85852	8.26673	36.6982	11.99	38.7654	11.99
KY21.Chr1.290	KH.C1.832		1.2153	2.2291	FGL2: fibrinogen like 2	1.07851	1.87824	1.39302	1	1.07851	1.87824	1.39302	0.62698	0.595079	0.48962	1.34473	0.48962
KY21.Chr1.291	KH.C1.1276		9.9295	8.4597	CALM2: calmodulin 2	4.21462	3.64812	3.30407	4.33014	4.21462	3.64812	3.30407	4.33014	35.8823	3.61369	34.9848	3.61369
KY21.Chr1.292	0		10.2787	2.9149		1.31299	1	1	1	1.31299	0.228658	0.513898	0	1.65589	0.161099	1.25929	0.161099
KY21.Chr1.293	KH.C1.1157		4.6696	4.5711	KCND2: potassium voltage-gated channel subfamily D member 2	3.99566	3.47925	5.26918	4.50991	3.99566	3.47925	5.26918	4.50991	20.7084	4.43471	17.1449	4.43471
KY21.Chr1.294	KH.C1.285		0.107	0.3927	CKM: creatine kinase, M-type	1	1	1	1	0.781542	0.770076	0.362242	0.269603	0.0918644	0.857985	0.208216	0.857985
KY21.Chr1.295	KH.C1.583		1.4441	1.3865	CACNA2D3: calcium voltage-gated channel auxiliary subunit alpha2delta 3	1	1	1	1	0.927886	0.771084	0.889092	0.9315	1.73286	1.19989	1.59401	1.19989
KY21.Chr1.296	KH.C1.1045		#NUM!	0	LRRC15: leucine rich repeat containing 15	1.16223	1.17817	1.29	1.1419	1.16223	1.17817	1.29	1.1419	0	0	0	0
KY21.Chr1.297	KH.C1.430		2.3769	1.7938		1	1	1	1	0.968684	0.787255	0.25276	0.276045	1.8834	0.79236	1.23876	0.79236
KY21.Chr1.298	KH.C1.1275		0.2629	0.2373	RUVBL1: RuvB like AAA ATPase 1	60.2907	53.0652	41.7442	51.2879	60.2907	53.0652	41.7442	51.2879	16.2898	61.9615	14.3067	61.9615
KY21.Chr1.299	KH.C1.1224		1.3163	1.3178	P3H2: prolyl 3-hydroxylase 2	2.12396	1.82184	1.59231	2.36684	2.12396	1.82184	1.59231	2.36684	3.13176	2.37912	2.98976	2.37912
KY21.Chr1.3	KH.L28.2		#NUM!	#NUM!	HTR2C: 5-hydroxytryptamine receptor 2C	1	1	1	1	0	0	0	0	0	0	0	0
KY21.Chr1.30	SPKH.C11.10124		0	1.9433		1	1	1	1	0	0.061588	0.069208	0	0	0.0433912	0.113061	0.0433912
KY21.Chr1.300	SPKH.C1.10534		1.6668	0.9311		1	1	1	1	0.395934	0.31342	0.264149	0.276944	0.680914	0.408511	0.330835	0.408511
KY21.Chr1.301	KH.C1.146		2.2652	2.0664	EPHA7: EPH receptor A7	1	1	1.13408	1	0.528796	0.551912	1.13408	0.61618	3.37731	1.49094	2.72111	1.49094
KY21.Chr1.302	KH.C1.1075		1.3779	1.1066	EME1: essential meiotic structure-specific endonuclease 1	2.14497	2.13143	2.71614	2.97715	2.14497	2.13143	2.71614	2.97715	2.94385	2.13641	3.30773	2.13641
KY21.Chr1.303	KH.C1.913		0.4818	0.3238		1	1	1	1	0.194284	0.120838	0.271578	0.21355	0.0656312	0.136217	0.0221831	0.136217
KY21.Chr1.304	KH.C1.993		0.7144	0.6522	SVEP1: sushi, von Willebrand factor type A, EGF and pentraxin domain containing 1	1	1	1	1	0.0692003	0.0366779	0.300288	0.0668764	0.270356	0.378387	0.235662	0.378387
KY21.Chr1.305	KH.C1.47		#NUM!	#NUM!		1	1	1	1	0	0	0	0	0	0	0	0
KY21.Chr1.306	KH.C1.1302		0.7676	0.758	COQ4: coenzyme Q4	2.98292	3.05408	1.63579	4.48373	2.98292	3.05408	1.63579	4.48373	2.45457	3.19742	2.88189	3.19742
KY21.Chr1.307	KH.C1.411		0.4912	0.4649	NDUFB10: NADH:ubiquinone oxidoreductase subunit B10	84.2553	92.6831	70.071	87.7533	84.2553	92.6831	70.071	87.7533	34.1574	69.53	37.8507	69.53
KY21.Chr1.308	KH.C1.124		0.5708	0.4386	MCM7: minichromosome maintenance complex component 7	7.64046	7.97081	5.69666	6.95447	7.64046	7.97081	5.69666	6.95447	6.36393	11.1491	3.9264	11.1491
KY21.Chr1.309	KH.C1.178		0.9472	0.8302	SSU72: SSU72 homolog, RNA polymerase II CTD phosphatase	2.50853	3.04655	2.06701	2.63838	2.50853	3.04655	2.06701	2.63838	2.62772	2.77414	1.78071	2.77414
KY21.Chr1.31	KH.S822.1		0.8222	0.5552		1	1	1	1	0.121623	0.211807	0.571232	0.270338	0.306772	0.373066	0.233297	0.373066
KY21.Chr1.310	KH.C1.178		2.9979	0		1	1.70317	1	1	0	1.70317	0	0	2.15845	0.719972	0	0.719972
KY21.Chr1.311	KH.C1.1270		1.9272	1.4574		1	1	1.00982	1	0.573343	0.499241	1.00982	0.784248	0.271154	0.140694	1.37473	0.140694
KY21.Chr1.312	0		0.6424	0		1	1	1	1	0.114807	0.0999689	0.112338	0	0.0452469	0.070432	0	0.070432
KY21.Chr1.313	KH.C1.1121		1.3531	0.9716	SULT1C2: sulfotransferase family 1C member 2	1.59719	1.51065	2.61371	2.77798	1.59719	1.51065	2.61371	2.77798	4.7319	3.49704	3.05933	3.49704
KY21.Chr1.314	KH.C1.147		0.8565	0.6726	RNF17: ring finger protein 17	1	1	1	1	0.106668	0.0983456	0.0982343	0.0965556	0.049458	0.0577403	0.0451349	0.0577403
KY21.Chr1.315	KH.C1.974		#NUM!	0.9716		1	1	1	1	0	0.0919714	0	0	0	0	0.0844189	0
KY21.Chr1.316	KH.C1.133		1.5904	0.7827		166.717	128.455	149.494	157.814	166.717	128.455	149.494	157.814	121.876	76.6277	94.4721	76.6277
KY21.Chr1.317	KH.C1.133		1.5838	0.8384	CALU: calumenin	369.076	290.728	291.74	311.435	369.076	290.728	291.74	311.435	363.162	229.292	170.056	229.292
KY21.Chr1.318	KH.C1.252		0.8292	0.5834	CALU: calumenin	41.2121	33.2106	35.7883	35.4803	41.2121	33.2106	35.7883	35.4803	33.3525	40.2179	25.7581	40.2179
KY21.Chr1.319	KH.C1.999		1.9272	#NUM!		1	1	1	1	0	0.0236498	0.0531518	0.0232193	0.0642248	0.0333244	0.0434154	0.0333244
KY21.Chr1.32	KH.C1.1153		1.8558	4.2105		1	1	1	1	0.369268	0.459346	0.051618	0.135296	0.540553	0.291265	1.64434	0.291265
KY21.Chr1.320	SPKH.C1.10294		0	0		1	1	1	1	0.091514	0.139451	0.134319	0.234708	0	0.561422	0	0.561422
KY21.Chr1.321	0		#NUM!	#NUM!		1	1	1	1	0	0	0	0	0	0	0	0
KY21.Chr1.322	KH.C1.142		1.3785	1.2889	RASSF9: Ras association domain family member 9	1	1	2.41525	1	0.253705	0.354385	2.41525	0.59646	3.61625	2.62324	2.19672	2.62324
KY21.Chr1.323	0		#NUM!	#NUM!		1	1	1	1	0	0	0	0	0	0	0	0
KY21.Chr1.324	0		#NUM!	#NUM!		1	1	1	1	0	0	0	0	0	0	0	0
KY21.Chr1.325	0		#NUM!	#NUM!		1	1	1	1	0	0	0	0	0	0	0	0
KY21.Chr1.326	KH.C1.113		0.2658	0.1295	MYBPC3: myosin binding protein C, cardiac	10.0895	7.44472	15.1747	7.18401	10.0895	7.44472	15.1747	7.18401	0.0187198	0.0704203	0.0569448	0.0704203
KY21.Chr1.327	0		#NUM!	#NUM!		1	1	1	1	0	0	0	0	0	0	0	0
KY21.Chr1.328	KH.C1.1247		#NUM!	0		3.85998	3.47504	6.33761	2.79655	3.85998	3.47504	6.33761	2.79655	0	0	0	0
KY21.Chr1.329	KH.C1.308		5.8453	4.2496	DUOXA1: dual oxidase maturation factor 1	19.7003	20.8456	13.1276	18.0784	19.7003	20.8456	13.1276	18.0784	58.752	10.0511	37.5699	10.0511
KY21.Chr1.33	KH.C1.1153		0.9778	1.5615		1	1	1.09486	1	0.0972981	0.635421	1.09486	0.831808	3.29779	3.37252	1.74973	3.37252
KY21.Chr1.330	KH.C1.5		19.4422	7.0881	DUOX1: dual oxidase 1	4.74646	3.81258	4.11952	6.08934	4.74646	3.81258	4.11952	6.08934	22.5411	1.15939	11.346	1.15939
KY21.Chr1.331	KH.C1.272		0.7111	0.9424	SPO11: SPO11, initiator of meiotic double stranded breaks	1	1	1	1	0.371219	0.484862	0.368738	0.451995	0.390139	0.548637	0.579908	0.548637
KY21.Chr1.332	KH.C1.108		0.357	0.599	SS18L1: SS18L1, nBAF chromatin remodeling complex subunit	19.7948	18.2195	19.59	19.6895	19.7948	18.2195	19.59	19.6895	7.23779	20.2704	12.0914	20.2704
KY21.Chr1.333	KH.C1.563		0.2019	0.4201		2.31641	1.71257	1.32574	1	2.31641	1.71257	1.32574	0.971475	0.378951	1.87689	0.558911	1.87689
KY21.Chr1.334	KH.C1.847		36.9099	51.7408		2.29984	2.0026	1	1.12352	2.29984	2.0026	0.785846	1.12352	9.09276	0.24635	6.21471	0.24635
KY21.Chr1.335	KH.C1.25		8.6915	12.7935		1	1	1	1	0.424548	0.168035	0.188826	0.890876	3.49851	0.402518	2.43694	0.402518
KY21.Chr1.336	KH.C1.855		0.2569	0.3238		1	1	1	1	0.213379	0.0929004	0.208789	0.592862	0.0420477	0.16363	0.0426358	0.16363
KY21.Chr1.337	KH.C1.891		0.0058	0		8.38258	9.70716	3.25555	5.17158	8.38258	9.70716	3.25555	5.17158	0.0340586	5.85828	0	5.85828
KY21.Chr1.338	KH.C1.1028		1.0512	0.7403		1.44723	1.32651	1.67696	1.72564	1.44723	1.32651	1.67696	1.72564	0.270176	0.257009	0.487032	0.257009
KY21.Chr1.339	KH.C1.857		2.5696	#NUM!		1	1	1	1	0.0442965	0.0771428	0.0866874	0.0378694	0.0698313	0.0271751	0	0.0271751
KY21.Chr1.34	KH.C1.1100		0.1887	0.2948	PCDH18: protocadherin 18	1.1231	1	1.39951	1.04221	1.1231	0.952869	1.39951	1.04221	0.628002	3.32723	0.805573	3.32723
KY21.Chr1.340	KH.C1.1255		0.9177	6.8016		1	1	1	1	0.564714	0.245864	0.0920947	0.482778	0.370935	0.404182	1.05315	0.404182
KY21.Chr1.341	KH.C1.475		0.7412	1.3029		1	1	1	1.28569	0.944307	0.791806	0.923996	1.28569	0.82703	1.11572	1.64924	1.11572
KY21.Chr1.342	KH.C1.595		0	#NUM!		1	1	1	1	0.115927	0.0504721	0.113434	0	0	0.0355596	0.0463274	0.0355596
KY21.Chr1.343	KH.L146.1		0.735	0.2097	RTL1: retrotransposon Gag like 1	1.45708	1.37027	2.22416	2.09273	1.45708	1.37027	2.22416	2.09273	2.91722	3.9689	0.698746	3.9689
KY21.Chr1.344	SPKH.C1.10249		0.8373	0.5715		1	1	1	1	0.138044	0.240404	0.455876	0.339291	0.788869	0.942145	0.137914	0.942145
KY21.Chr1.345	KH.C1.1169		0.4533	0.4436	ABT1: activator of basal transcription 1	20.328	20.0764	16.5931	23.8269	20.328	20.0764	16.5931	23.8269	10.668	23.5306	13.0405	23.5306
KY21.Chr1.346	KH.C1.729		0.3791	0.186		1	1	1	1	0.662686	0.540206	0.524265	0.542427	0.200048	0.527645	0.101423	0.527645
KY21.Chr1.347	KH.C1.880		0.6858	0.6072		1.35782	1.51383	1.70113	1.59476	1.35782	1.51383	1.70113	1.59476	1.42036	2.07082	1.41994	2.07082
KY21.Chr1.348	KH.C1.1144		0.3868	0.2498	CENPN: centromere protein N	4.67261	4.28006	3.56268	5.03221	4.67261	4.28006	3.56268	5.03221	2.00895	5.19331	1.74604	5.19331
KY21.Chr1.349	KH.C1.1235		1.1119	1.5949	ATG13: autophagy related 13	1.88487	1.70965	1.6599	1.79938	1.88487	1.70965	1.6599	1.79938	2.38951	2.14885	3.2766	2.14885
KY21.Chr1.35	KH.C1.996		0.684	1.0263	LPCAT3: lysophosphatidylcholine acyltransferase 3	5.85205	5.33185	3.51951	4.84433	5.85205	5.33185	3.51951	4.84433	3.79145	5.54281	4.92824	5.54281
KY21.Chr1.350	KH.C1.550		0.5314	0.4455		46.8479	56.9815	37.3286	53.2225	46.8479	56.9815	37.3286	53.2225	23.7066	44.6103	28.6731	44.6103
KY21.Chr7.224	KH.C7.581	TaGup	3.9923	4.1634	B4GALT1: beta-1,4-galactosyltransferase 1	1.54569	3.76438	1.44155	2.18861	1.54569	3.76438	1.44155	2.18861	13.7827	3.45224	13.6473	3.45224
KY21.Chr1.352	0		#NUM!	#NUM!		1	1	1	1	0	0	0	0	0	0	0	0
KY21.Chr1.353	KH.C1.92		0.9553	1.1224	RPRD2: regulation of nuclear pre-mRNA domain containing 2	2.43568	1.98907	4.07987	2.94107	2.43568	1.98907	4.07987	2.94107	4.37122	4.57559	3.68447	4.57559
KY21.Chr1.354	KH.C1.48		0.9959	1.0769	DCAF8: DDB1 and CUL4 associated factor 8	2.72806	2.30986	2.62514	3.09247	2.72806	2.30986	2.62514	3.09247	2.74435	2.75546	3.20436	2.75546
KY21.Chr1.355	KH.C1.496		#NUM!	#NUM!		1	1	1	1	0	0	0	0	0	0	0	0
KY21.Chr1.356	KH.C1.838		0	0.4858		1.14703	1	2.24472	1	1.14703	0	2.24472	0.980605	0	1.14348	0.229192	1.14348
KY21.Chr1.357	KH.C1.605		0.5613	0.5455	NTMT1: N-terminal Xaa-Pro-Lys N-methyltransferase 1	23.337	24.2966	16.5058	24.3966	23.337	24.2966	16.5058	24.3966	13.1463	23.4205	13.8877	23.4205
KY21.Chr1.358	KH.C1.80		0.7108	0.6755	TMEM201: transmembrane protein 201	19.0409	17.4295	17.5354	15.1354	19.0409	17.4295	17.5354	15.1354	16.8597	23.7172	13.1104	23.7172
KY21.Chr1.359	KH.C1.1160		1.0256	0.8262	WDR48: WD repeat domain 48	7.83711	7.09423	9.98566	8.77266	7.83711	7.09423	9.98566	8.77266	12.2215	11.916	9.21548	11.916
KY21.Chr1.36	KH.C1.523		0.761	0.7229	GYG1: glycogenin 1	2.0008	2.06484	1.72573	2.34402	2.0008	2.06484	1.72573	2.34402	1.79904	2.36399	1.10163	2.36399
KY21.Chr1.360	SPKH.C1.10128		7.0386	4.1889	NXPE2: neurexophilin and PC-esterase domain family member 2	2.44488	1.65981	1.62189	2.01929	2.44488	1.65981	1.62189	2.01929	8.23108	1.16941	6.42526	1.16941
KY21.Chr1.361	SPKH.C1.10128		2.5696	0.4318	NXPE2: neurexophilin and PC-esterase domain family member 2	1	1	1	1	0.320531	0.279104	0.179221	0.62634	0.866231	0.337097	0.292782	0.337097
KY21.Chr1.362	0		#NUM!	1.6194	ODC1: ornithine decarboxylase 1	1	1	1	1	0	0	0	0.0607382	0.224003	0	0.28392	0
KY21.Chr1.363	KH.C1.597		#NUM!	#NUM!	NXPE2: neurexophilin and PC-esterase domain family member 2	1	1	1	1	0	0.0394727	0.0443565	0.0387542	0.0357315	0	0.0724626	0
KY21.Chr1.364	KH.C1.1139		2.4626	7.7732	NXPE1: neurexophilin and PC-esterase domain family member 1	1	1	1	1	0.545539	0.554203	0.578289	0.738444	0.824183	0.334679	0.581364	0.334679
KY21.Chr1.365	KH.C1.399		0.5766	0.6127	USP14: ubiquitin specific peptidase 14	19.337	15.7199	12.5028	15.3138	19.337	15.7199	12.5028	15.3138	10.7516	18.6435	10.8378	18.6435
KY21.Chr1.366	KH.C1.310		1.8104	3.1578	EFCAB8: EF-hand calcium binding domain 8	1	1	1	1	0.128983	0.112312	0.141056	0.110268	0.185394	0.102402	0.2365	0.102402
KY21.Chr1.367	KH.C1.254		#NUM!	#NUM!		1	1	1	1	0	0	0	0.330356	0.609178	0	0	0
KY21.Chr1.368	SPKH.C1.10129		1.9272	0.6477	EFCAB8: EF-hand calcium binding domain 8	1	1	1	1	0.0978657	0.113623	0.0319202	0.167332	0.154281	0.0800518	0.0521462	0.0800518
KY21.Chr1.369	0		#NUM!	#NUM!		1	1	1	1	0	0	0.0702005	0	0.0565501	0	0	0
KY21.Chr1.37	KH.C1.1202		2.9212	2.7611	DOCK9: dedicator of cytokinesis 9	1	1	1.77759	1	0.737816	0.70242	1.77759	0.845224	3.26452	1.11751	2.89346	1.11751
KY21.Chr1.370	KH.C1.665		0.6012	0.771		80.0863	71.2961	59.5814	56.1418	80.0863	71.2961	59.5814	56.1418	35.0945	58.3666	26.4185	58.3666
KY21.Chr1.371	SPKH.C1.10316		0.4844	0.3924	FBN1: fibrillin 1	1	1	1	1	0.104825	0.0958405	0.194883	0.0403269	0.0950193	0.196139	0.0879703	0.196139
KY21.Chr1.372	KH.L24.37		0	0.1943		1	1	1	1	0.565835	0.123176	0.415248	0.120934	0	0.433912	0.113061	0.433912
KY21.Chr1.373	KH.C9.761		0.4282	0.3238		1	1	1	1	0	0.0390537	0.0658284	0.115029	0.123733	0.288906	0.0179233	0.288906
KY21.Chr1.374	KH.L24.9		3.2459	6.4777	ADGRE1: adhesion G protein-coupled receptor E1	1	1	1	1	0.0412051	0.0461309	0.0633582	0.055356	0.445426	0.137227	0.282285	0.137227
KY21.Chr1.375	KH.L24.4		0.5409	1.5546	FBN1: fibrillin 1	1	1	1	1	0.370822	0.177592	0.344704	0.190211	0.35075	0.648354	0.237104	0.648354
KY21.Chr1.376	SPKH.C1.10316		0.8114	0.5182	LTBP4: latent transforming growth factor beta binding protein 4	1	1	1	1	0.136909	0.092722	0.312582	0.364137	0.287773	0.354629	0.291798	0.354629
KY21.Chr1.377	KH.L24.43		0.3059	0.6783	FBN1: fibrillin 1	1	1	1	1	0.30707	0.203721	0.257542	0.337521	0.172886	0.565146	0.432418	0.565146
KY21.Chr1.378	KH.L4.50		#NUM!	#NUM!		1	1	1	1	0.0411694	0	0	0	0	0	0	0
KY21.Chr1.379	SPKH.L4.10006		#NUM!	#NUM!	RTL1: retrotransposon Gag like 1	1	1	1	1	0	0	0	0	0	0	0	0
KY21.Chr1.38	KH.C1.568		1.491	1.4529		32.0844	29.4628	37.7775	47.7624	32.0844	29.4628	37.7775	47.7624	33.9931	22.7976	45.6876	22.7976
KY21.Chr1.380	0		#NUM!	#NUM!		1	1	1	1	0	0	0	0	0	0	0	0
KY21.Chr1.381	KH.S1235.1		1.0212	0.4441	FBN2: fibrillin 2	1	1	1	1	0.691347	0.48494	0.563731	0.607455	0.938504	0.918946	0.491164	0.918946
KY21.Chr1.382	SPKH.C1.10316		0.9124	0.8126	FBN2: fibrillin 2	1	1	1	1	0.111738	0.0761454	0.166379	0.157825	0.187638	0.205648	0.178614	0.205648
KY21.Chr1.383	KH.L24.25		0.4282	#NUM!		1	1	1	1	0.124479	0.108391	0.0812009	0	0.0327058	0.0763654	0	0.0763654
KY21.Chr1.384	KH.L24.23		0.4945	0.4918	MYCN: MYCN proto-oncogene, bHLH transcription factor	8.86799	8.21296	22.0405	10.8575	8.86799	8.21296	22.0405	10.8575	10.348	20.9242	9.1364	20.9242
KY21.Chr1.385	0		#NUM!	#NUM!		1	1	1	1	0	0	0	0	0	0	0	0
KY21.Chr1.386	KH.L24.34		0	0		1	1	1	1	0	0	0	0.294982	0	0.10584	0	0.10584
KY21.Chr1.387	KH.L24.40		#NUM!	#NUM!		1	1	1	1	0	0	0	0	0	0	0	0
KY21.Chr1.388	KH.L24.41		0.8993	0.8097		1	1	1	1	0.953462	0.99628	0.559773	0.652098	0.526081	0.584932	0.381028	0.584932
KY21.Chr1.389	0		#NUM!	#NUM!		1	1	1	1	0	0	0	0.371085	0	0	0	0
KY21.Chr1.39	KH.C1.1156		#NUM!	#NUM!	OTOL1: otolin 1	1	1	1	1	0	0	0	0	0	0	0	0
KY21.Chr1.390	KH.L24.11		1.5355	0.8277	GRIA4: glutamate ionotropic receptor AMPA type subunit 4	1	1	1	1	0.184762	0.201104	0.193702	0.0902598	0.25486	0.165974	0.121302	0.165974
KY21.Chr1.391	KH.L24.7		0.4545	0.4869	RRM2: ribonucleotide reductase regulatory subunit M2	78.7214	72.3228	51.3521	70.7772	78.7214	72.3228	51.3521	70.7772	59.5661	131.033	56.8443	131.033
KY21.Chr1.392	KH.S970.4		0.4282	3.8866		1	1	1	1	0	0	0	0	0.0530283	0.123817	0.21508	0.123817
KY21.Chr1.393	KH.S970.4		2.5696	2.4291		1	1	1	1	0	0.150499	0.169119	0	0.181646	0.0706882	0.6907	0.0706882
KY21.Chr1.394	KH.L24.7		0.7443	1.2654	PCMTD1: protein-L-isoaspartate (D-aspartate) O-methyltransferase domain containing 1	1.12771	1.41609	1	1.70492	1.12771	1.41609	0.929227	1.70492	0.683044	0.917587	1.06262	0.917587
KY21.Chr1.395	KH.L24.20		0.0808	0.0323	COL6A6: collagen type VI alpha 6 chain	24.4366	19.0915	49.3998	41.8919	24.4366	19.0915	49.3998	41.8919	0.764839	9.4632	0.498967	9.4632
KY21.Chr1.396	KH.L24.14		0.2109	0.0124		15.0736	11.6174	30.0637	28.3505	15.0736	11.6174	30.0637	28.3505	1.11231	5.27299	0.205066	5.27299
KY21.Chr1.397	KH.L24.33		1.0031	1.0385	LAPTM4A: lysosomal protein transmembrane 4 alpha	59.6417	62.5957	50.3875	62.197	59.6417	62.5957	50.3875	62.197	50.6486	50.4889	60.7976	50.4889
KY21.Chr1.398	KH.L24.30		1.467	1.7895	AMFR: autocrine motility factor receptor	2.8994	2.33496	2.69765	2.92288	2.8994	2.33496	2.69765	2.92288	5.21147	3.55232	5.14372	3.55232
KY21.Chr1.399	KH.L24.6		1.142	#NUM!		1	1	1	1	0.112917	0.0983234	0.0789204	0.110324	0.101719	0.0890649	0.103142	0.0890649
KY21.Chr1.4	KH.L28.6		1.1586	1.0821	IRS1: insulin receptor substrate 1	7.12273	6.54773	9.60609	7.58927	7.12273	6.54773	9.60609	7.58927	13.3031	11.4816	13.2388	11.4816
KY21.Chr1.40	KH.C1.318		#NUM!	#NUM!		1	1	1	1	0	0	0	0	0	0	0	0
KY21.Chr1.400	0		#NUM!	#NUM!		1	1	1	1	0	0	0	0	0	0	0	0
KY21.Chr1.401	SPKH.L24.10025		#NUM!	#NUM!	DMRT3: doublesex and mab-3 related transcription factor 3	1	1	1	1	0	0	0	0	0	0	0.0266961	0
KY21.Chr1.402	KH.L24.8		7.5056	6.362		6.37001	4.65176	6.86449	6.80466	6.37001	4.65176	6.86449	6.80466	37.2007	4.95635	26.9559	4.95635
KY21.Chr1.403	KH.L24.22		0.3906	0.7702	SLC22A5: solute carrier family 22 member 5	3.49625	3.74376	2.21906	2.93511	3.49625	3.74376	2.21906	2.93511	1.97377	5.05304	3.03354	5.05304
KY21.Chr1.404	SPKH.S1265.10001		0.0217	0.2159		1	1	1	1.46256	0.074382	0	0	1.46256	0.0586298	2.69229	0.1189	2.69229
KY21.Chr1.405	KH.S1265.1		0.0109	0.0793		1.32737	1	8.99184	8.86001	1.32737	0.844635	8.99184	8.86001	0.0402411	3.66443	0.489648	3.66443
KY21.Chr1.406	KH.L24.3		1.9272	6.8016		1	1	1	1	0.170054	0.11846	0.46591	0.436141	0.0804246	0.04173	0.190282	0.04173
KY21.Chr1.407	KH.L24.17		1.1777	1.213	TTLL7: tubulin tyrosine ligase like 7	1.05229	1	1	1.11338	1.05229	0.807421	0.744206	1.11338	1.08402	0.920403	1.63212	0.920403
KY21.Chr1.408	KH.L24.12		1.0495	0.965		261.936	298.37	118.476	211.276	261.936	298.37	118.476	211.276	145.574	138.7	241.148	138.7
KY21.Chr1.409	KH.L24.31		0.859	0.7588	COG6: component of oligomeric golgi complex 6	4.26963	4.19939	3.16041	4.42556	4.26963	4.19939	3.16041	4.42556	3.94088	4.58725	3.12077	4.58725
KY21.Chr1.41	KH.C1.1246		#NUM!	#NUM!		1	1	1	1	0	0	0	0	0	0	0	0
KY21.Chr1.410	0		1.4989	0.1619		1	1	1	1	0.576997	0.690832	0	0	0.198977	0.132741	0.0288228	0.132741
KY21.Chr1.411	KH.L24.13		0.169	0.8221		1	1	1	1	0.0642062	0.0914857	0.074248	0.0499003	0.0230041	0.136072	0.0513169	0.136072
KY21.Chr1.412	KH.L24.18		#NUM!	#NUM!		1	1	1	1	0	0	0	0	0	0	0	0
KY21.Chr1.413	KH.L24.13		0.8565	1.5853		1	1	1	1	0.0223198	0.051827	0.0291197	0.0254419	0.36359	0.424477	0.184338	0.424477
KY21.Chr1.414	SPKH.L24.10007		#NUM!	0.9716	GLIPR1: GLI pathogenesis related 1	1	1	1	1	0	0.0147811	0	0.0145121	0	0	0.0135673	0
KY21.Chr1.415	SPKH.L24.10005		0.3261	0.4062	MTX2: metaxin 2	18.6459	20.5731	16.1621	20.6354	18.6459	20.5731	16.1621	20.6354	6.10706	18.7254	9.90117	18.7254
KY21.Chr1.416	KH.L24.2		1.4766	1.4047	RPL23: ribosomal protein L23	45.2264	53.8921	32.6799	47.5613	45.2264	53.8921	32.6799	47.5613	51.4583	34.8472	73.1556	34.8472
KY21.Chr1.417	KH.L24.16		0.6703	0.1649	CCDC96: coiled-coil domain containing 96	1	1	1	1	0.135478	0.188749	0.176752	0.169871	0.0854297	0.12744	0.0649685	0.12744
KY21.Chr1.418	KH.L24.35		1.9272	#NUM!		1	1	1	1	0.102491	0.0446222	0	0.0438101	0.121179	0.0628763	0.491495	0.0628763
KY21.Chr1.419	KH.L24.39		0.5303	0.5881	B3GAT3: beta-1,3-glucuronyltransferase 3	12.2249	14.2514	11.3083	14.1633	12.2249	14.2514	11.3083	14.1633	6.47664	12.2127	7.36811	12.2127
KY21.Chr1.42	SPKH.S1315.10001		#NUM!	#NUM!		1	1	1	1	0	0	0	0	0	0	0	0
KY21.Chr1.420	KH.L24.1		0.5506	0.6822	ABHD10: abhydrolase domain containing 10	4.70546	3.70501	3.57564	3.89434	4.70546	3.70501	3.57564	3.89434	2.24905	4.08439	2.64059	4.08439
KY21.Chr1.421	SPKH.L24.10012		0.2909	0.6268	ABHD10: abhydrolase domain containing 10	2.80248	2.68431	1.64532	2.30003	2.80248	2.68431	1.64532	2.30003	0.530158	1.82243	0.895955	1.82243
KY21.Chr1.422	KH.L24.10		0.004	0.0164	EBF3: early B-cell factor 3	1.56445	1.50079	2.01512	1.70772	1.56445	1.50079	2.01512	1.70772	0.00696689	1.73516	0.0282574	1.73516
KY21.Chr1.423	KH.L24.32		0.0967	0.6755		104.143	76.707	76.9274	128.39	104.143	76.707	76.9274	128.39	0.64449	6.6627	7.84205	6.6627
KY21.Chr1.424	KH.L24.29		0.7709	0.8123	SPEF1: sperm flagellar 1	1	1	1	1.37776	0.710996	0.722288	0.858035	1.37776	1.12085	1.45394	1.9321	1.45394
KY21.Chr5.947	0	TaGup	3.4262	#NUM!		1.45686	2.22	1.78191	3.73644	1.45686	2.22	1.78191	3.73644	2.29667	0.670319	4.07539	0.670319
KY21.Chr11.271	KH.C11.297	TaGup	3.3903	2.9275	RHBDL3: rhomboid[-]like 3	5.77235	8.8614	4.8483	7.41649	5.77235	8.8614	4.8483	7.41649	26.5105	7.81937	21.6544	7.81937
KY21.Chr4.47	KH.C4.409	TaGup	2.9285	2.7776	CHAC1: ChaC glutathione[-]specific gamma-glutamylcyclotransferase 1	115.924	277.223	83.5434	215.891	115.924	277.223	83.5434	215.891	125.308	42.7885	156.471	42.7885
KY21.Chr1.428	KH.S597.4		1.6708	1.288	IP6K1: inositol hexakisphosphate kinase 1	2.37651	2.56093	1.82646	2.28079	2.37651	2.56093	1.82646	2.28079	4.06942	2.43549	3.34765	2.43549
KY21.Chr9.174	KH.C9.886	TaGup	2.7532	3.7926		37.4632	60.9849	31.3805	52.5596	37.4632	60.9849	31.3805	52.5596	46.3347	16.8292	85.8046	16.8292
KY21.Chr1.43	SPKH.S1315.10001		#NUM!	#NUM!		1	1	1	1	0	0	0	0	0	0	0	0
KY21.Chr1.430	KH.S597.5		0.8009	0.6543	SZRD1: SUZ RNA binding domain containing 1	4.62798	4.38733	4.16324	4.62654	4.62798	4.38733	4.16324	4.62654	4.23627	5.28912	3.93756	5.28912
KY21.Chr1.431	KH.S597.1		0.6232	0.6981	KIFC1: kinesin family member C1	11.4781	9.29917	6.00133	9.29624	11.4781	9.29917	6.00133	9.29624	6.02079	9.66099	7.33255	9.66099
KY21.Chr1.432	KH.S1217.1		0.5139	1.4574		1	1	1	1	0.0144534	0.0503416	0	0.0123563	0.0227851	0.0443346	0.0346558	0.0443346
KY21.Chr1.433	KH.C1.1117		0	0.9716		1	1	1	1	0.121768	0.188498	0.225059	0.185067	0	0.0747025	0.108137	0.0747025
KY21.Chr1.434	KH.C1.1065		0.6302	0.5092	ESYT2: extended synaptotagmin 2	1.52394	1.14705	1.76196	1.694	1.52394	1.14705	1.76196	1.694	0.52644	0.835309	0.737297	0.835309
KY21.Chr1.435	KH.C1.1165		0.8343	0.6136	JAG2: jagged 2	1	1	1	1	0.296306	0.304921	0.42172	0.330075	0.353872	0.424149	0.258352	0.424149
KY21.Chr1.436	KH.C1.635		0.3212	0.9864		22.6518	21.2415	15.5342	23.5031	22.6518	21.2415	15.5342	23.5031	5.03596	15.6781	20.5803	15.6781
KY21.Chr1.437	KH.C1.151		0.0835	0.1263		7.23844	8.36309	10.0626	13.3977	7.23844	8.36309	10.0626	13.3977	0.295432	3.53528	0.730188	3.53528
KY21.Chr1.438	KH.C1.1035		0.0462	0.0757		24.9507	26.0353	14.6283	20.1406	24.9507	26.0353	14.6283	20.1406	3.25071	70.3355	4.57345	70.3355
KY21.Chr1.439	KH.C1.357		0.2181	0.0713		1	1	3.8878	6.45386	0.893983	0.518961	3.8878	6.45386	0.704661	3.22972	0.635126	3.22972
KY21.Chr1.44	KH.C1.608		0.6083	1.0943	IGFALS: insulin like growth factor binding protein acid labile subunit	2.91325	2.65398	5.2221	3.86142	2.91325	2.65398	5.2221	3.86142	3.27078	5.37671	4.18725	5.37671
KY21.Chr1.440	SPKH.C1.10051		0.1284	0.0539		1	1	4.68683	2.83492	0.736901	0.962491	4.68683	2.83492	0.290422	2.26038	0.294484	2.26038
KY21.Chr1.441	KH.C1.381		0.6484	0.694	METTL27: methyltransferase like 27	6.71691	7.85408	8.19989	9.95337	6.71691	7.85408	8.19989	9.95337	8.11814	12.5191	6.13542	12.5191
KY21.Chr1.442	KH.C1.33		0.3312	0.2516		7.97905	8.28287	1.89828	3.53105	7.97905	8.28287	1.89828	3.53105	4.68614	14.1475	3.60128	14.1475
KY21.Chr1.443	KH.C1.33		#NUM!	#NUM!		1	1	15.4121	13.7621	0.555096	0.72503	15.4121	13.7621	0	0	0	0
KY21.Chr1.444	KH.C1.957		0	0		1	1	1	1	0.49254	0.571843	0.160649	0.140359	0	0.402886	0	0.402886
KY21.Chr1.445	SPKH.C1.10642		#NUM!	#NUM!		1	1	1	1	0.259373	0	0	0	0	0	0	0
KY21.Chr1.446	SPKH.C1.10236		0.4496	1.2753	SLC43A3: solute carrier family 43 member 3	1.45737	1	1.23157	1.52908	1.45737	0.865236	1.23157	1.52908	0.731014	1.62558	1.11186	1.62558
KY21.Chr1.447	KH.C1.1219		0.7637	0.9745	POLQ: DNA polymerase theta	1	1	1	1	0.553782	0.530061	0.839693	0.874584	0.922992	1.20852	1.12849	1.20852
KY21.Chr1.448	KH.C1.265		0.0971	0.0984	CKB: creatine kinase B	47.5301	39.1935	25.3039	38.0626	47.5301	39.1935	25.3039	38.0626	3.87005	39.851	5.17745	39.851
KY21.Chr1.449	KH.C1.930		0.51	0.4452	WDR82: WD repeat domain 82	13.5031	13.7549	13.6707	14.665	13.5031	13.7549	13.6707	14.665	8.81734	17.2857	7.70619	17.2857
KY21.Chr1.45	KH.C1.130		0.7064	0.7255	MKLN1: muskelin 1	9.90825	9.46825	7.81908	10.1556	9.90825	9.46825	7.81908	10.1556	7.22869	10.2323	6.6654	10.2323
KY21.Chr1.450	KH.C1.226		0.9562	1.027	TMEM115: transmembrane protein 115	29.4942	29.0334	30.058	33.8291	29.4942	29.0334	30.058	33.8291	44.7036	46.7486	43.008	46.7486
KY21.Chr1.451	KH.C1.237		0.7968	1.0097	CYB561D1: cytochrome b561 family member D1	34.6715	39.5285	25.266	35.9607	34.6715	39.5285	25.266	35.9607	24.99	31.3625	34.1605	31.3625
KY21.Chr1.452	KH.C1.1082		0.577	0.7619		4.36637	3.86009	2.90266	4.07478	4.36637	3.86009	2.90266	4.07478	1.97043	3.41482	2.90375	3.41482
KY21.Chr1.453	KH.C1.149		0.5212	0.6404	RYK: receptor-like tyrosine kinase	3.53987	3.03955	2.71807	3.82485	3.53987	3.03955	2.71807	3.82485	3.02273	5.7986	3.72321	5.7986
KY21.Chr1.454	KH.C1.256		0.3637	0.386	PEBP1: phosphatidylethanolamine binding protein 1	32.7323	37.2682	20.7416	30.7943	32.7323	37.2682	20.7416	30.7943	4.94475	13.594	9.46174	13.594
KY21.Chr1.455	KH.C1.1103		0.9387	1.0732	TVP23B: trans-golgi network vesicle protein 23 homolog B	15.7095	16.0497	13.4065	14.4985	15.7095	16.0497	13.4065	14.4985	19.5589	20.8356	24.862	20.8356
KY21.Chr1.456	KH.C1.542		0.4524	0.4336	ZPR1: ZPR1 zinc finger	4.60025	3.77895	4.36541	5.71367	4.60025	3.77895	4.36541	5.71367	2.73663	6.04903	3.0524	6.04903
KY21.Chr1.457	KH.C1.469		0.9696	0.9644	BNIP1: BCL2 interacting protein 1	4.32807	3.97426	2.34849	3.63283	4.32807	3.97426	2.34849	3.63283	4.96218	5.11728	4.21396	5.11728
KY21.Chr1.458	KH.C1.724		0.685	0.6315	SCO1: SCO1, cytochrome c oxidase assembly protein	13.0433	11.6847	11.0295	12.7569	13.0433	11.6847	11.0295	12.7569	9.51949	13.8962	7.80791	13.8962
KY21.Chr1.459	KH.C1.661		2.2982	1.7999	MXI1: MAX interactor 1, dimerization protein	11.0875	10.9096	13.8374	12.0208	11.0875	10.9096	13.8374	12.0208	29.8731	12.998	23.4593	12.998
KY21.Chr1.46	KH.C1.631		0.8533	1.5782	LRIG3: leucine rich repeats and immunoglobulin like domains 3	3.49165	3.6532	4.59633	4.20704	3.49165	3.6532	4.59633	4.20704	5.2722	6.17852	8.40701	6.17852
KY21.Chr1.460	0		#NUM!	#NUM!		1	1	1	1	0	0	0	0	0	0	0	0
KY21.Chr1.461	KH.C1.661		2.4516	1.7977		35.8497	32.4682	38.7712	40.557	35.8497	32.4682	38.7712	40.557	76.487	31.1983	78.9213	31.1983
KY21.Chr1.462	KH.C1.489		0.7746	0.6961	SERPINI1: serpin family I member 1	2.12508	2.30227	1.28147	1.56325	2.12508	2.30227	1.28147	1.56325	0.798567	1.03083	0.947984	1.03083
KY21.Chr1.1393	KH.L18.100	TaGup	2.5066	2.3283		9.40481	15.6908	8.13977	13.0206	9.40481	15.6908	8.13977	13.0206	30.1778	12.0391	28.0351	12.0391
KY21.Chr1.464	KH.C1.486		0.1299	0.0679	FZD2: frizzled class receptor 2	734.013	816.027	518.168	779.137	734.013	816.027	518.168	779.137	114.673	882.441	83.4139	882.441
KY21.Chr1.465	KH.C1.520		0.13	0.0497	FZD8: frizzled class receptor 8	30.991	35.4408	17.4044	18.3483	30.991	35.4408	17.4044	18.3483	7.76114	59.6817	3.95298	59.6817
KY21.Chr1.466	KH.C1.543		0.2352	0.0816	FZD2: frizzled class receptor 2	3.97277	3.58397	1	1	3.97277	3.58397	0.805481	0.795542	0.733491	3.11789	0.54351	3.11789
KY21.Chr1.467	KH.C1.1248		0.4426	0.2751	NME7: NME/NM23 family member 7	5.46806	5.00552	4.45871	6.89217	5.46806	5.00552	4.45871	6.89217	2.26555	5.11785	1.79297	5.11785
KY21.Chr1.468	KH.C1.827		1.0692	0.7713	CNPY2: canopy FGF signaling regulator 2	2.68975	2.31302	1.40586	1.64249	2.68975	2.31302	1.40586	1.64249	1.56706	1.46563	1.38868	1.46563
KY21.Chr1.469	KH.C1.973		0.6662	0.5191	KLHL2: kelch like family member 2	1.16679	1.38021	1	1	1.16679	1.38021	0.0646241	0.0941033	0.728813	1.09396	0.686221	1.09396
KY21.Chr1.47	KH.C1.139		0.4852	0.4291	TSTD1: thiosulfate sulfurtransferase like domain containing 1	26.1773	26.7616	26.0514	30.2844	26.1773	26.7616	26.0514	30.2844	12.9928	26.7746	14.7455	26.7746
KY21.Chr1.470	SPKH.C1.10063		0.0917	0.2649		1	1	1	1	0.207933	0.150883	0.0339102	0.237018	0.0273164	0.297648	0.0830955	0.297648
KY21.Chr1.471	0		0.6424	#NUM!		1	1	1	1	0.214583	0	0	0.183448	0.16914	0.263285	0	0.263285
KY21.Chr1.472	0		0.0584	0.0399		3.6014	3.7923	1	1	3.6014	3.7923	0	0	0.0660167	1.13039	0.20082	1.13039
KY21.Chr1.473	KH.C1.379		0.8176	0.5773		2.97683	3.03645	1	1	2.97683	3.03645	0.027741	0	0.156428	0.19132	0.929036	0.19132
KY21.Chr1.474	KH.C1.796		0.1763	0.1598	MASP1: mannan binding lectin serine peptidase 1	1.30813	1.02811	1	1	1.30813	1.02811	0.60675	0.871425	0.0937365	0.531535	0.176517	0.531535
KY21.Chr1.475	KH.C1.657		0.0489	0.0223	MASP1: mannan binding lectin serine peptidase 1	2.98293	2.77778	1.42898	2.32876	2.98293	2.77778	1.42898	2.32876	0.106132	2.16674	0.0745035	2.16674
KY21.Chr1.476	KH.C1.773		0.6645	0.3827	TROVE2: TROVE domain family member 2	1	1	1	1	0.476656	0.480157	0.621872	0.655191	0.552519	0.83139	0.291329	0.83139
KY21.Chr1.477	KH.C1.575		0.7771	1.0931	ITFG1: integrin alpha FG-GAP repeat containing 1	1.20078	1	1	1	1.20078	0.815064	0.721625	0.864893	0.924129	1.18909	0.884156	1.18909
KY21.Chr1.478	KH.C1.1091		#NUM!	#NUM!		1	1	5.00084	1	0.255538	0	5.00084	0.655384	0	0	0	0
KY21.Chr1.479	KH.C1.87		0.382	0.3732	PTPA: protein phosphatase 2 phosphatase activator	28.0529	19.6177	17.4226	22.9264	28.0529	19.6177	17.4226	22.9264	7.73349	20.2418	7.60932	20.2418
KY21.Chr1.48	KH.C1.1166		0.2223	0.0519		1.6757	1.73116	1.63965	1.74821	1.6757	1.73116	1.63965	1.74821	0.604446	2.71813	0.1589	2.71813
KY21.Chr1.480	KH.C1.162		0.4814	0.6328	AGPS: alkylglycerone phosphate synthase	9.16693	7.08403	4.8192	6.45909	9.16693	7.08403	4.8192	6.45909	4.69513	9.75258	3.63758	9.75258
KY21.Chr1.481	KH.C1.888		0.3789	0.2234	RASEF: RAS and EF-hand domain containing	1	1.11141	1	1.09118	0.962188	1.11141	0.806993	1.09118	0.634598	1.67448	0.360973	1.67448
KY21.Chr1.482	KH.C1.548		0.6204	0.5833	CASD1: CAS1 domain containing 1	3.1838	2.74682	2.16282	2.91582	3.1838	2.74682	2.16282	2.91582	2.52686	4.07254	2.20537	4.07254
KY21.Chr1.483	KH.C1.126		0.655	0.2429		1	1	1.09265	1	0.944876	0.797824	1.09265	0.832259	0.586793	0.895845	0.411923	0.895845
KY21.Chr1.484	KH.C1.865		1.6061	1.2087	GOLIM4: golgi integral membrane protein 4	14.6568	12.9264	14.9144	14.9165	14.6568	12.9264	14.9144	14.9165	23.6002	14.6933	16.7863	14.6933
KY21.Chr1.485	KH.C1.426		0.8767	0.9603	RNF103: ring finger protein 103	16.1257	18.5918	15.4394	16.3513	16.1257	18.5918	15.4394	16.3513	13.9657	15.9287	13.8021	15.9287
KY21.Chr1.486	KH.C1.800		#NUM!	#NUM!		1	1	1	1	0	0	0	0	0	0	0	0
KY21.Chr1.487	KH.C1.1104		5.2954	4.3059	POFUT2: protein O-fucosyltransferase 2	21.9799	30.1174	21.2888	25.42	21.9799	30.1174	21.2888	25.42	141.723	26.7632	160.247	26.7632
KY21.Chr1.488	KH.C1.424		1.1967	1.2011	BIN3: bridging integrator 3	4.69039	4.576	3.5803	4.40873	4.69039	4.576	3.5803	4.40873	6.31021	5.27285	6.57512	5.27285
KY21.Chr1.489	KH.C1.529		0.8794	0.8389	GPHN: gephyrin	1.63906	1.58266	1.60381	1.53998	1.63906	1.58266	1.60381	1.53998	1.69276	1.92479	1.61267	1.92479
KY21.Chr1.49	KH.C1.1253		0	0.3036		1	1	1	1.63001	0.272379	0.948702	0.533041	1.63001	0	1.671	0.544248	1.671
KY21.Chr1.490	SPKH.S2536.10002		#NUM!	#NUM!	RTL1: retrotransposon Gag like 1	1	1	1	1	0	0	0	0	0	0	0	0
KY21.Chr1.491	KH.C1.844		0.7341	1.9433		1.81139	1.67586	1	1	1.81139	1.67586	0.59081	0.935594	0.118982	0.162058	0.120646	0.162058
KY21.Chr1.492	KH.C1.626		0.6918	0.6218		1.10821	1	2.04827	3.0528	1.10821	0.643323	2.04827	3.0528	0.679407	0.982034	1.57465	0.982034
KY21.Chr1.493	KH.C1.1191		0.5025	0.7215	FUT6: fucosyltransferase 6	1.80942	2.10075	2.05276	2.53331	1.80942	2.10075	2.05276	2.53331	1.81896	3.61972	1.57194	3.61972
KY21.Chr1.494	KH.L12.5		0.8543	0.4892	SELE: selectin E	1.3861	1.81043	1.16384	2.09775	1.3861	1.81043	1.16384	2.09775	432.573	506.33	53.6779	506.33
KY21.Chr1.495	KH.L12.4		1.6745	1.117	MAMDC2: MAM domain containing 2	1	1	1	1	0.323231	0.299046	0.207558	0.194296	0.632967	0.378002	0.682186	0.378002
KY21.Chr1.496	KH.L12.2		0	1.7004		1	1	1	1	0.0818779	0.463422	0.120175	0.139996	0	0.0251153	0.68713	0.0251153
KY21.Chr1.497	KH.L12.1		#NUM!	#NUM!		1	1	1	1	0	0.409773	0	0	0	0	0	0
KY21.Chr1.498	KH.L12.3		3.1925	2.7549	MAMDC2: MAM domain containing 2	2.5808	2.22331	1.11974	1.63346	2.5808	2.22331	1.11974	1.63346	4.20666	1.31764	4.63355	1.31764
KY21.Chr1.499	KH.C1.567		0.7449	0.6826	SF3B4: splicing factor 3b subunit 4	15.7502	14.5875	8.69604	11.7839	15.7502	14.5875	8.69604	11.7839	8.55506	11.4838	7.53453	11.4838
KY21.Chr1.5	KH.L28.5		0.6668	0.6754	FAF2: Fas associated factor family member 2	3.31996	3.25071	2.50152	2.60473	3.31996	3.25071	2.50152	2.60473	2.18626	3.27855	2.14406	3.27855
KY21.Chr1.50	0		#NUM!	#NUM!		1	1	1	1	0	0	0.0463918	0	0	0	0	0
KY21.Chr1.500	KH.C1.921		#NUM!	0		1	1	1	1	0.555908	0.580872	0	0.28515	0	0	0	0
KY21.Chr1.501	KH.C1.911		0.3516	0.2951	TSR2: TSR2, ribosome maturation factor	20.8679	21.4746	10.9762	19.1799	20.8679	21.4746	10.9762	19.1799	9.00448	25.6041	7.44937	25.6041
KY21.Chr1.502	KH.C1.843		0.3264	0.3645	MRPL9: mitochondrial ribosomal protein L9	31.9908	39.9404	25.5012	38.545	31.9908	39.9404	25.5012	38.545	9.655	29.5786	13.3832	29.5786
KY21.Chr1.503	KH.C1.185		0.5738	0.3963	TRPT1: tRNA phosphotransferase 1	1	1	1	1	0.627978	0.800694	0.537662	0.584797	0.406598	0.708591	0.277844	0.708591
KY21.Chr1.504	KH.C1.218		0.7213	0.8233	ILKAP: ILK associated serine/threonine phosphatase	4.41659	3.17833	2.90488	4.20224	4.41659	3.17833	2.90488	4.20224	3.24152	4.49344	3.23824	4.49344
KY21.Chr1.505	KH.C1.850		0.4865	0.3922		32.7066	35.4615	28.8028	32.8769	32.7066	35.4615	28.8028	32.8769	20.8321	42.816	22.4305	42.816
KY21.Chr1.506	KH.C1.494		0.3981	0.4678	PTRH2: peptidyl-tRNA hydrolase 2	55.0349	53.2	40.4825	46.3094	55.0349	53.2	40.4825	46.3094	23.3584	58.6719	23.9927	58.6719
KY21.Chr1.507	KH.C1.700		0.2569	0.2728	PTRH2: peptidyl-tRNA hydrolase 2	21.3193	21.6981	16.0745	19.9619	21.3193	21.6981	16.0745	19.9619	6.61994	25.7617	7.89276	25.7617
KY21.Chr1.508	KH.C1.590		0.3815	0.3793		638.995	664.591	473.338	553.185	638.995	664.591	473.338	553.185	163.166	427.588	261.519	427.588
KY21.Chr1.509	KH.C1.763		0.2055	0.0544		4.28383	6.12813	4.89031	4.18546	4.28383	6.12813	4.89031	4.18546	2.25108	10.9502	0.489122	10.9502
KY21.Chr1.51	0		#NUM!	#NUM!		1	1	1	1	0	0	0	0	0	0	0	0
KY21.Chr1.510	KH.C1.554		0.9224	0.6477	GJA4: gap junction protein alpha 4	1	1	1	1	0.686355	0.493709	0.656993	0.663305	0.329306	0.356991	0.477018	0.356991
KY21.Chr1.511	KH.C1.961		0.2992	0.2751		100.989	111.513	89.148	111.511	100.989	111.513	89.148	111.511	15.422	51.5281	22.9037	51.5281
KY21.Chr1.512	KH.C1.868		#NUM!	#NUM!		1	1	1	1	0	0	0	0.0656974	0.0605731	0	0	0
KY21.Chr1.513	KH.C1.1132		1.0706	0.1554		1	1	1	1	0.339328	0.422102	0.569193	0.745955	0.191048	0.178433	0.154976	0.178433
KY21.Chr1.514	KH.C1.1146		0.46	0.6934	SLC22A16: solute carrier family 22 member 16	13.0566	11.8852	10.4034	13.6035	13.0566	11.8852	10.4034	13.6035	9.01752	19.6008	15.3877	19.6008
KY21.Chr1.515	KH.C1.812		0.1127	0.1079		1	1	1	1	0.299596	0.168802	0.155198	0.180796	0.0694558	0.616261	0.0422564	0.616261
KY21.Chr1.516	KH.C1.955		2.3053	2.4744	KCNT1: potassium sodium-activated channel subfamily T member 1	1	1	1	1	0.425688	0.212836	0.454154	0.298183	0.679736	0.294849	0.838506	0.294849
KY21.Chr1.517	SPKH.S609.10001		0	0.4858		1.96196	1.1573	1.05277	1	1.96196	1.1573	1.05277	0.541063	0	0.310614	0.556423	0.310614
KY21.Chr1.518	KH.C1.277		3.5945	2.6746	ADGRG2: adhesion G protein-coupled receptor G2	2.03725	1.61808	1.18438	1.53033	2.03725	1.61808	1.18438	1.53033	6.50388	1.80936	5.30722	1.80936
KY21.Chr1.519	KH.C1.901		0.6193	0.5505	CALU: calumenin	12.967	12.672	22.6378	25.6803	12.967	12.672	22.6378	25.6803	16.2505	26.2401	12.5261	26.2401
KY21.Chr1.52	0		0	#NUM!	MUC4: mucin 4, cell surface associated	1	1	1	1	0	0	0.0294975	0.00859066	0	0.00616466	0	0.00616466
KY21.Chr1.520	KH.C1.719		0.4545	0.5997	SLC22A4: solute carrier family 22 member 4	4.43475	4.39161	4.69673	5.35242	4.43475	4.39161	4.69673	5.35242	3.94796	8.68471	3.58618	8.68471
KY21.Chr1.521	KH.C1.893		#NUM!	#NUM!		1	1	1	1	0	0	0	0	0	0	0	0
KY21.Chr1.522	KH.C1.640		0	0.3238		1	1	1	1	0.113845	0.297392	0.55698	0.583959	0	0.628574	0.0909904	0.628574
KY21.Chr1.523	SPKH.C1.10238		0.4594	0.7263	SLC16A12: solute carrier family 16 member 12	2.04335	1.51624	1	1	2.04335	1.51624	0.330336	0.410136	0.756292	1.64598	1.0935	1.64598
KY21.Chr1.524	KH.C1.1072		0.4282	0		13.3084	12.4914	9.13244	15.367	13.3084	12.4914	9.13244	15.367	0.408703	0.95429	0	0.95429
KY21.Chr1.525	KH.C1.820		0	#NUM!		1	1	1	1	0	0.125415	0	0	0	0.0883602	0	0.0883602
KY21.Chr1.526	KH.C1.620		2.0471	1.8301	DENND1A: DENN domain containing 1A	1	1	1.06674	1	0.822783	0.641216	1.06674	0.791328	2.15963	1.05495	1.80843	1.05495
KY21.Chr1.527	KH.C1.412		1.0467	0.8032	CSNK2B: casein kinase 2 beta	72.0144	75.0167	33.2047	70.8216	72.0144	75.0167	33.2047	70.8216	65.2977	62.3789	56.1236	62.3789
KY21.Chr1.528	KH.C1.594		0.6424	#NUM!		1	1	1	1	0	0.0717903	0	0.0704837	0.0649861	0.101158	0.197685	0.101158
KY21.Chr1.529	KH.C1.941		32.6475	24.7975	HMBOX1: homeobox containing 1	4.77131	4.42864	5.62103	4.66085	4.77131	4.42864	5.62103	4.66085	62.585	1.91699	50.1542	1.91699
KY21.Chr1.53	0		#NUM!	#NUM!		1	1	1	1	0	0	0	0	0	0	0	0
KY21.Chr1.530	KH.C1.650		1.2848	#NUM!		1	1	1	1	0.172107	0.299726	0.392945	0.882811	0.361757	0.281558	1.23801	0.281558
KY21.Chr1.531	KH.C1.86		0.417	0.4471	MRPL13: mitochondrial ribosomal protein L13	7.76114	8.41163	5.30517	7.43503	7.76114	8.41163	5.30517	7.43503	2.68998	6.44973	3.4315	6.44973
KY21.Chr1.532	KH.C1.757		#NUM!	#NUM!		1	1	1	1	0	0	0	0	0	0	0	0
KY21.Chr1.533	KH.C1.1151		0.5088	0.3913	RPA2: replication protein A2	9.80694	10.4652	7.1837	10.0112	9.80694	10.4652	7.1837	10.0112	3.97221	7.80684	3.86839	7.80684
KY21.Chr1.534	KH.C1.296		0.5368	0.4799	RPL22L1: ribosomal protein L22 like 1	372.891	438.351	292.652	405.815	372.891	438.351	292.652	405.815	174.384	324.806	213.392	324.806
KY21.Chr1.535	0		1.7295	0.9442		6.81972	5.43138	1.70895	3.12841	6.81972	5.43138	1.70895	3.12841	2.29441	1.32656	4.58654	1.32656
KY21.Chr1.536	KH.C1.400		1.1444	1.0225	PIGZ: phosphatidylinositol glycan anchor biosynthesis class Z	17.6801	18.4859	13.0328	16.1264	17.6801	18.4859	13.0328	16.1264	22.5959	19.7434	19.5616	19.7434
KY21.Chr1.537	KH.C1.1041		0.559	0.4875	NIF3L1: NGG1 interacting factor 3 like 1	22.8121	21.4715	19.8154	22.6083	22.8121	21.4715	19.8154	22.6083	12.1126	21.6682	13.1865	21.6682
KY21.Chr1.538	KH.C1.786	TaGdown	0.3525	0.9716		5.78802	2.97497	5.15224	1	5.78802	2.97497	5.15224	0.996517	1.86926	5.30161	3.50169	5.30161
KY21.Chr11.426	0	TaGup	2.4733	29.6356		2.03992	3.10847	1.59683	2.44152	2.03992	3.10847	1.59683	2.44152	6.19048	2.50291	9.94549	2.50291
KY21.Chr1.54	0		#NUM!	#NUM!		1	1	1	1	0	0	0	0	0	0	0	0
KY21.Chr1.540	KH.C1.1037		0.3686	0.3238	LRP6: LDL receptor related protein 6	1	1	1	1	0.673698	0.395075	0.248885	0.364376	0.189652	0.514519	0.236261	0.514519
KY21.Chr2.100	KH.C2.411	TaGup	2.4591	0.3953	GP2: glycoprotein 2	1.80821	4.06748	1.74826	3.0549	1.80821	4.06748	1.74826	3.0549	9.0607	3.68448	2.4431	3.68448
KY21.Chr1.542	SPKH.C1.10543		0.3426	0.9716	SNED1: sushi, nidogen and EGF like domains 1	1	1	1	1	0.0853706	0.024779	0.0835344	0.072984	0.0448609	0.130933	0.0568605	0.130933
KY21.Chr1.543	KH.C1.324		0.5526	0.7298	CDIPT: CDP-diacylglycerol--inositol 3-phosphatidyltransferase	50.0694	49.4697	25.3807	35.8137	50.0694	49.4697	25.3807	35.8137	17.0529	30.8575	31.0742	30.8575
KY21.Chr1.544	SPKH.C1.10100		0.3212	1.9433	NOTCH3: notch 3	1	1	1	1	0.0570333	0.0372465	0.0279033	0.0853268	0.0337163	0.104967	0.0683759	0.104967
KY21.Chr1.545	KH.C1.205		1.1263	1.1582		1.00622	1.38594	1	1	1.00622	1.38594	0.859266	0.578696	1.94677	1.72843	2.17871	1.72843
KY21.Chr1.546	KH.C1.845		0.1482	0.0588		2.86382	1.04574	2.62143	2.60625	2.86382	1.04574	2.62143	2.60625	0.436903	2.94706	0.147672	2.94706
KY21.Chr1.547	KH.L18.106		0.4758	0		1.37569	1.138	1	1.3525	1.37569	1.138	0.874966	1.3525	0.542178	1.13935	0	1.13935
KY21.Chr1.548	KH.C1.1002		0	0		1.72211	1	1.17955	1.03057	1.72211	0.89972	1.17955	1.03057	0	1.58472	0	1.58472
KY21.Chr1.549	SPKH.C1.10402		0.0856	0		1.43004	1.9006	1	1.866	1.43004	1.9006	0.810112	1.866	0.177978	2.07783	0	2.07783
KY21.Chr1.55	0		#NUM!	0		1	1	1	1	0	0	0.0813785	0	0	0	0	0
KY21.Chr1.550	SPKH.C1.10016		1.9272	1.1659	CRB2: crumbs 2, cell polarity complex component	1	1	1	1	0.0110857	0.0289589	0.0325419	0.00947728	0.0262142	0.0136018	0.0531617	0.0136018
KY21.Chr1.551	KH.C1.50		0.2716	0.1994	CHDH: choline dehydrogenase	3.25274	2.97874	3.44129	3.48185	3.25274	2.97874	3.44129	3.48185	2.30967	8.50191	1.77156	8.50191
KY21.Chr1.552	SPKH.S1368.10001		#NUM!	#NUM!		1	1	1	1	0	0	0	0	0.870255	0	0	0
KY21.Chr1.553	KH.C1.21		1.4023	1.2938	ELOVL4: ELOVL fatty acid elongase 4	3.21597	3.77414	2.37915	3.49615	3.21597	3.77414	2.37915	3.49615	10.837	7.72791	8.82285	7.72791
KY21.Chr1.554	SPKH.C1.10359		#NUM!	#NUM!	IGSF10: immunoglobulin superfamily member 10	1	1	1	1	0.0111586	0.00971643	0.0327558	0.0286187	0.105546	0	0.196208	0
KY21.Chr1.555	KH.C1.604		4.4969	4.3724	IGSF10: immunoglobulin superfamily member 10	1	1	1	1	0.0285209	0.0248348	0	0	0.157367	0.0349941	0.205158	0.0349941
KY21.Chr1.556	0		0	0		1	1	1	1	0.791569	0.814584	0.492891	0.922797	0	0.838786	0	0.838786
KY21.Chr1.557	KH.C1.219		0.8756	0.7801	MBNL1: muscleblind like splicing regulator 1	1	1	1.22475	1	0.572194	0.521596	1.22475	0.764332	0.701193	0.800789	0.786031	0.800789
KY21.Chr1.558	KH.C1.415		0.4282	0	PEBP1: phosphatidylethanolamine binding protein 1	1	1	1	1	0.212663	0.222213	0.166471	0.363614	0.335253	0.782788	0	0.782788
KY21.Chr1.559	KH.C1.534		0.48	0.3533	ATP5H: ATP synthase, H+ transporting, mitochondrial Fo complex subunit D	49.0206	51.6257	39.3237	47.7129	49.0206	51.6257	39.3237	47.7129	16.0127	33.3583	17.4721	33.3583
KY21.Chr1.56	0		0	#NUM!		1	1	1	1	0	0	0.548391	0	0	0.0528959	0	0.0528959
KY21.Chr1.560	KH.C1.115		0.5544	0.5583	RPS29: ribosomal protein S29	182.403	196.416	115.304	169.182	182.403	196.416	115.304	169.182	68.9137	124.285	112.711	124.285
KY21.Chr1.561	KH.C1.837		0.7121	0.6572	DHCR24: 24-dehydrocholesterol reductase	4.32507	4.35403	3.37492	5.80372	4.32507	4.35403	3.37492	5.80372	4.04205	5.67615	3.04841	5.67615
KY21.Chr1.562	KH.C1.751		2.6732	1.8891	ABTB1: ankyrin repeat and BTB domain containing 1	6.00982	4.92825	3.42557	5.08796	6.00982	4.92825	3.42557	5.08796	3.55972	1.33159	5.8573	1.33159
KY21.Chr1.563	KH.C1.1125		0.3842	0.3317	ARRB1: arrestin beta 1	37.1357	33.1256	23.6837	26.5985	37.1357	33.1256	23.6837	26.5985	15.5386	40.4378	16.4413	40.4378
KY21.Chr1.564	KH.C1.267		0.7279	0.7578	TAF3: TATA-box binding protein associated factor 3	2.24368	1.99188	2.23117	2.29926	2.24368	1.99188	2.23117	2.29926	2.01047	2.76188	1.82247	2.76188
KY21.Chr1.565	KH.C1.968		1.3916	1.8188	B3GAT3: beta-1,3-glucuronyltransferase 3	28.5386	27.7106	20.3911	26.5919	28.5386	27.7106	20.3911	26.5919	43.2096	31.0482	37.168	31.0482
KY21.Chr1.566	KH.C1.118		0.3099	0.3259		3.95569	3.6059	4.11252	4.15673	3.95569	3.6059	4.11252	4.15673	1.67267	5.39698	1.76193	5.39698
KY21.Chr1.567	KH.C8.248		0.0824	0.0229	COL24A1: collagen type XXIV alpha 1 chain	1.44115	1.77095	2.19449	1.53094	1.44115	1.77095	2.19449	1.53094	0.500759	6.07111	0.0783795	6.07111
KY21.Chr1.568	KH.C8.342		1.1679	1.2244	HPCAL1: hippocalcin like 1	9.00979	8.49382	8.7764	10.1524	9.00979	8.49382	8.7764	10.1524	10.139	8.68086	15.4503	8.68086
KY21.Chr1.569	KH.C8.541		0.8565	2.9149		1	1	1	1	0.645789	0.22493	0	0.220836	0.203611	0.237708	0.619378	0.237708
KY21.Chr1.57	0		#NUM!	0	ZAN: zonadhesin (gene/pseudogene)	1	1	1	1	0	0.00892445	0.100286	0	0.0161572	0	0	0
KY21.Chr1.570	SPKH.C8.10192		1.2354	1.3765		1.33262	1.83728	1.62995	1.7089	1.33262	1.83728	1.62995	1.7089	2.18835	1.77133	1.50889	1.77133
KY21.Chr1.571	SPKH.L76.10003		0.5621	0.5552		1	1	1	1	0	0.606405	0.454289	0.595367	0.640418	1.1393	0.371072	1.1393
KY21.Chr1.572	SPKH.S951.10008		0.6424	#NUM!		1	1	1	1	0	0	0	0.152187	0.701582	1.09209	0.142279	1.09209
KY21.Chr1.573	0		0.7709	0.1143		12.2508	14.5834	1	1	12.2508	14.5834	0.455215	0.397721	6.96729	9.03782	0.247886	9.03782
KY21.Chr1.574	SPKH.C8.10068		#NUM!	#NUM!		1	1	1	1	0.502964	0.875918	0	0	0	0	0	0
KY21.Chr1.575	SPKH.C1.10174		#NUM!	0.3238	NXPE3: neurexophilin and PC-esterase domain family member 3	1	1	1	1	0	0.0466991	0	0.0229246	0	0	0.0214322	0
KY21.Chr1.576	KH.C1.678		0.6693	0.802	BAHCC1: BAH domain and coiled-coil containing 1	1.12823	1	1	1.00311	1.12823	0.848805	0.92733	1.00311	1.06005	1.58364	1.12537	1.58364
KY21.Chr1.577	KH.C1.1222		0.4186	0.4809	GPALPP1: GPALPP motifs containing 1	14.7566	14.742	9.68213	11.931	14.7566	14.742	9.68213	11.931	7.16829	17.1234	8.95998	17.1234
KY21.Chr1.578	KH.C1.67		1.141	1.0841		1	1	1	1	0.525589	0.415162	0.484896	0.484634	0.704281	0.617241	0.723133	0.617241
KY21.Chr1.579	KH.C1.682		2.019	10.6882		1.62298	1.51416	2.38211	1.98214	1.62298	1.51416	2.38211	1.98214	3.01543	1.4935	4.07681	1.4935
KY21.Chr1.58	0		#NUM!	#NUM!		1	1	1	1	0	0	0	0	0	0	0	0
KY21.Chr1.580	KH.C1.1061		#NUM!	0		1	1	1	1	0	0	0	0	0	0	0	0
KY21.Chr1.581	KH.C1.676		3.8545	0.3238	C17orf105: chromosome 17 open reading frame 105	1	1	1	1	0.0319638	0.111331	0.125105	0.0546521	0.151168	0.0392184	0.102188	0.0392184
KY21.Chr1.582	KH.C1.740		1.0745	0.8758	TNIK: TRAF2 and NCK interacting kinase	4.36566	3.58811	3.98498	4.09872	4.36566	3.58811	3.98498	4.09872	7.11672	6.62317	4.41227	6.62317
KY21.Chr1.583	KH.C1.1105		0.8208	0.2776	CTSD: cathepsin D	1	1	1	1	0.45279	0.364513	0.568443	0.233717	0.309763	0.377359	0.15022	0.377359
KY21.Chr1.584	KH.C1.555		1.2789	1.2478	JAK2: Janus kinase 2	6.74996	5.68979	7.25893	5.86278	6.74996	5.68979	7.25893	5.86278	11.066	8.6524	8.87662	8.6524
KY21.Chr1.585	KH.C1.949		0.0098	0.0163		2.90326	2.34031	3.00958	3.75989	2.90326	2.34031	3.00958	3.75989	0.0226577	2.30132	0.0344619	2.30132
KY21.Chr1.586	KH.C1.1080		5.7416	0.1714		1.04868	1.1575	1.14174	1.46474	1.04868	1.1575	1.14174	1.46474	1.66483	0.289958	0.177075	0.289958
KY21.Chr1.587	KH.C1.872		0.8176	0.7125	RDH13: retinol dehydrogenase 13	2.24697	1.47318	1.21572	1.37857	2.24697	1.47318	1.21572	1.37857	0.729286	0.891956	1.39446	0.891956
KY21.Chr1.588	KH.C1.510		0.1511	0.1619		1	1	1	1	0.671126	0.563516	0.187626	0.225402	0.0377856	0.249975	0.0383142	0.249975
KY21.Chr1.589	KH.C1.1252		1.3026	1.8428	PIK3IP1: phosphoinositide-3-kinase interacting protein 1	1	1	1	1	0.930139	0.728932	0.507074	0.340793	0.764581	0.586927	1.16822	0.586927
KY21.Chr1.59	KH.C1.791		0.5987	0.4655	FBN1: fibrillin 1	1	1	1	1	0.0415682	0.0271468	0.176932	0.0533054	0.0786363	0.131332	0.0382069	0.131332
KY21.Chr1.590	KH.C1.446		0.2922	0.2543	TGFB1I1: transforming growth factor beta 1 induced transcript 1	4.01679	3.63755	3.77318	4.84682	4.01679	3.63755	3.77318	4.84682	2.48768	8.51215	2.65089	8.51215
KY21.Chr1.591	KH.C1.356		0.4085	0.2787	MATN3: matrilin 3	1	1	1	1	0.521327	0.557708	0.514972	0.640939	0.270035	0.660971	0.13889	0.660971
KY21.Chr1.592	KH.C1.356		#NUM!	0.1388		1.52445	1	1	1	1.52445	0	0.639282	0.558541	0	0	0.0870298	0
KY21.Chr1.593	KH.C1.1298		0.4159	0.5843		4.55019	3.62425	3.69301	5.24697	4.55019	3.62425	3.69301	5.24697	1.55697	3.74359	2.50907	3.74359
KY21.Chr1.594	KH.C1.923		0.3023	0.2604	C1orf109: chromosome 1 open reading frame 109	10.1233	12.3624	8.33516	9.39327	10.1233	12.3624	8.33516	9.39327	1.94621	6.43767	2.56546	6.43767
KY21.Chr1.595	KH.C1.1251		0.4761	0.5347	ACBD6: acyl-CoA binding domain containing 6	6.0194	5.03983	4.16826	4.75018	6.0194	5.03983	4.16826	4.75018	1.93436	4.06207	3.44172	4.06207
KY21.Chr1.596	KH.C1.834		0.6798	0.6111	PSMD12: proteasome 26S subunit, non-ATPase 12	64.7722	54.5738	60.1153	66.6882	64.7722	54.5738	60.1153	66.6882	42.4046	62.3772	46.2226	62.3772
KY21.Chr1.597	KH.C1.425		0.7162	0.5614	RNF144A: ring finger protein 144A	2.8727	3.15114	4.79437	4.33768	2.8727	3.15114	4.79437	4.33768	1.2841	1.79287	1.40146	1.79287
KY21.Chr1.598	KH.C1.1230		0.9706	1.0071		1.63308	1.32561	2.40145	1.34881	1.63308	1.32561	2.40145	1.34881	1.99995	2.06034	2.30077	2.06034
KY21.Chr1.599	KH.C1.17		0.6457	0.6707	TRNAU1AP: tRNA selenocysteine 1 associated protein 1	7.0326	5.60093	7.26737	7.36131	7.0326	5.60093	7.26737	7.36131	6.4897	10.0493	7.2111	10.0493
KY21.Chr1.6	KH.L60.7		0.5046	0.6806	TTC14: tetratricopeptide repeat domain 14	12.435	9.13442	10.0916	10.3285	12.435	9.13442	10.0916	10.3285	6.5499	12.9796	6.5002	12.9796
KY21.Chr1.60	KH.C1.1220		0.1352	0.0747	SELP: selectin P	1	1	1	1	0.364267	0.281945	0	0.0807371	0.0212685	0.157258	0.010783	0.157258
KY21.Chr1.600	KH.C1.1068		0	#NUM!	RSU1: Ras suppressor protein 1	1	1	1	1	0	0	0.0760968	0.0221619	0	0.0159034	0	0.0159034
KY21.Chr1.601	KH.C1.306		0.6614	0.4816	DEK: DEK proto-oncogene	9.99081	9.78241	8.15691	9.70347	9.99081	9.78241	8.15691	9.70347	8.38174	12.6721	6.78908	12.6721
KY21.Chr1.602	KH.C1.792		2.5696	23.3198		1	1	1.27624	1	0.153447	0.267229	1.27624	0.459139	0.120951	0.0470684	2.94342	0.0470684
KY21.Chr1.603	KH.C1.934		14.9897	#NUM!		1.65322	2.44724	1	1.55469	1.65322	2.44724	0.970598	1.55469	2.28045	0.152133	24.2466	0.152133
KY21.Chr1.604	SPKH.C1.10022		2.5696	#NUM!		1	1	1	1	0	0.502677	0	0.164509	0.606712	0.236104	0	0.236104
KY21.Chr1.605	KH.C1.954		0	#NUM!		1	1	1	1	0.0549164	0.0956375	0.268676	0.140845	0	0.168451	0	0.168451
KY21.Chr1.606	KH.C1.925		1.066	0.4971		2.80104	3.50609	1.3704	1.2472	2.80104	3.50609	1.3704	1.2472	10.5333	9.88072	1.02609	9.88072
KY21.Chr1.607	KH.C1.1		0.8565	0.9716	C1orf158: chromosome 1 open reading frame 158	1	1	1	1	0.245761	0.213997	0.240475	0.231113	0.658631	0.768926	0.196425	0.768926
KY21.Chr1.608	KH.C1.81		0.806	0.5461	NUDT8: nudix hydrolase 8	4.82086	5.75253	3.84362	4.94566	4.82086	5.75253	3.84362	4.94566	2.84291	3.52711	2.19768	3.52711
KY21.Chr1.609	KH.C1.531		0.6147	0.5318	MVD: mevalonate diphosphate decarboxylase	9.90873	9.87385	9.22897	8.47104	9.90873	9.87385	9.22897	8.47104	7.89385	12.8403	5.37853	12.8403
KY21.Chr1.61	KH.C1.1216		0.4498	0.3721	IMP4: IMP4, U3 small nucleolar ribonucleoprotein	17.2978	19.356	19.1993	23.1752	17.2978	19.356	19.1993	23.1752	10.4599	23.2511	9.96656	23.2511
KY21.Chr1.610	KH.C1.621		0.5409	0.4557	NDUFA12: NADH:ubiquinone oxidoreductase subunit A12	73.0984	89.1487	45.7177	49.5153	73.0984	89.1487	45.7177	49.5153	24.4389	45.1748	29.9434	45.1748
KY21.Chr1.611	KH.C1.51		0.5185	0.802	MEP1B: meprin A subunit beta	1	1	1	1	0.0967239	0.0168446	0.189287	0.049614	1.02162	1.97003	0.803989	1.97003
KY21.Chr1.612	KH.C1.156		0.6278	0.608		7.98378	8.11058	6.24965	7.91745	7.98378	8.11058	6.24965	7.91745	4.53098	7.21625	4.12641	7.21625
KY21.Chr1.613	KH.C1.1182		0.6202	0.5753	RCC2: regulator of chromosome condensation 2	3.89413	3.33059	4.77747	5.28096	3.89413	3.33059	4.77747	5.28096	3.92641	6.33018	3.07289	6.33018
KY21.Chr1.614	KH.C1.695		2.0496	2.2994	PIK3CB: phosphatidylinositol-4,5-bisphosphate 3-kinase catalytic subunit beta	7.93995	6.40322	8.20347	10.4559	7.93995	6.40322	8.20347	10.4559	11.0312	5.38199	15.2147	5.38199
KY21.Chr1.615	KH.C1.1036		#NUM!	2.0363		1	1	22.7009	24.5125	0	0	22.7009	24.5125	0	0	18.7328	0
KY21.Chr1.616	KH.C1.953		0.4188	0.3785		2.15212	2.40635	2.99124	2.61344	2.15212	2.40635	2.99124	2.61344	1.71564	4.09589	1.75918	4.09589
KY21.Chr1.617	KH.C1.93		1.6108	1.8824		4.64586	4.44342	3.2628	4.37536	4.64586	4.44342	3.2628	4.37536	14.01	8.69755	13.5173	8.69755
KY21.Chr1.618	KH.C1.755		0.0031	0		51.6126	47.9258	33.1578	37.7585	51.6126	47.9258	33.1578	37.7585	0.0500193	16.0653	0	16.0653
KY21.Chr1.619	KH.C1.264		0.7267	0.8414	YBX1: Y-box binding protein 1	38.6754	41.7598	68.0165	51.1026	38.6754	41.7598	68.0165	51.1026	58.1781	80.0569	55.8524	80.0569
KY21.Chr1.62	KH.C1.869		18.2067	9.4316		4.77593	5.28983	4.67321	5.12822	4.77593	5.28983	4.67321	5.12822	37.5548	2.06268	39.4238	2.06268
KY21.Chr1.620	KH.C1.906		#NUM!	#NUM!	PPP1R32: protein phosphatase 1 regulatory subunit 32	1	1	1	1	0	0	0.022322	0	0.0179815	0	0	0
KY21.Chr1.621	KH.C1.859		0.2569	0		1	1	1	1	0.0860585	0.0749359	0.0168415	0.117715	0.0135667	0.0527953	0	0.0527953
KY21.Chr1.622	KH.C1.143		0.4133	0.38		35.3297	34.768	37.1109	40.7495	35.3297	34.768	37.1109	40.7495	19.3186	46.7338	15.3078	46.7338
KY21.Chr1.623	KH.C1.511		0.6415	0.8094	SRP14: signal recognition particle 14	44.2462	56.7681	43.4298	53.0752	44.2462	56.7681	43.4298	53.0752	39.072	60.9049	47.9622	60.9049
KY21.Chr1.624	KH.C1.511		0.8168	0.8071		33.1055	39.431	37.3682	41.4425	33.1055	39.431	37.3682	41.4425	28.145	34.4539	44.9814	34.4539
KY21.Chr1.625	KH.C1.284		0.9574	0.618	TEX261: testis expressed 261	5.95883	5.31106	3.41039	7.11272	5.95883	5.31106	3.41039	7.11272	5.18432	5.41448	4.67274	5.41448
KY21.Chr1.626	KH.C1.783		0.9741	1.0445	NELFA: negative elongation factor complex member A	1	1	1	1	0.640704	0.538321	0.703914	0.58618	1.02776	1.05506	1.15893	1.05506
KY21.Chr1.627	KH.C1.513		0.9441	1.3976		1.73592	1.21351	1.38758	1.59902	1.73592	1.21351	1.38758	1.59902	1.86937	1.97992	1.82712	1.97992
KY21.Chr1.628	KH.C1.368		1.43	2.1853	GRTP1: growth hormone regulated TBC protein 1	2.0365	2.05851	2.27139	2.56891	2.0365	2.05851	2.27139	2.56891	2.87368	2.00945	6.98875	2.00945
KY21.Chr1.629	KH.C1.1176		4.0954	1.9806	ABRA: actin binding Rho activating protein	1.51303	1.09033	3.01203	4.14813	1.51303	1.09033	3.01203	4.14813	2.09735	0.512121	2.21009	0.512121
KY21.Chr1.63	KH.C1.287		0.8133	0.9362	EIF4A2: eukaryotic translation initiation factor 4A2	80.9509	82.8923	64.9285	89.5827	80.9509	82.8923	64.9285	89.5827	95.3819	117.273	82.8208	117.273
KY21.Chr1.630	KH.C1.1085		0.4363	0.4251	ATRN: attractin	1	1	1	1	0.127086	0.139351	0.221071	0.233389	0.0667816	0.153042	0.105336	0.153042
KY21.Chr1.631	KH.C1.71		0.9202	0.6445		1	1	1	1	0.657325	0.410198	0.653907	0.814831	0.457674	0.497351	0.586661	0.497351
KY21.Chr1.632	KH.C1.152		1.3072	2.0263		67.8474	94.4613	34.8206	47.2658	67.8474	94.4613	34.8206	47.2658	186.449	142.622	103.238	142.622
KY21.Chr1.633	0		#NUM!	#NUM!		1	1	1	1	0	0	0	0.0270622	0	0	0	0
KY21.Chr1.634	KH.C1.300		2.7025	5.2611		1.91435	2.08788	1.79749	1.38863	1.91435	2.08788	1.79749	1.38863	0.929753	0.344022	3.43102	0.344022
KY21.Chr1.635	0		2.5696	4.3724		5.07955	3.79119	3.19519	2.48146	5.07955	3.79119	3.19519	2.48146	1.14395	0.445174	5.21979	0.445174
KY21.Chr1.636	KH.C1.673		0.7709	0.4858	SLC13A4: solute carrier family 13 member 4	1	1	1	1	0.0399525	0.0115963	0.0912173	0.0569261	0.0314916	0.0408502	0.010644	0.0408502
KY21.Chr1.637	SPKH.C1.10205		0.5113	0.472		54.1137	73.7907	63.8304	101.79	54.1137	73.7907	63.8304	101.79	5.06277	9.90022	28.6197	9.90022
KY21.Chr1.638	SPKH.C1.10234		0.6202	0.5475		3.908	5.09311	1	1.37179	3.908	5.09311	0.810373	1.37179	1.1424	1.84178	2.1099	1.84178
KY21.Chr1.639	SPKH.C1.10234		0.8973	0.7474		1.32446	1	1.38434	1.10656	1.32446	0.917384	1.38434	1.10656	1.04398	1.1634	0.721757	1.1634
KY21.Chr1.64	KH.C1.671		0.4684	0.4385		11.3783	13.0531	6.53878	10.1392	11.3783	13.0531	6.53878	10.1392	4.79279	10.2305	6.68829	10.2305
KY21.Chr1.640	KH.S768.1		1.9272	0		1	1	1	1	0.0640999	0.0558154	0.0627212	0	0.303151	0.157297	0	0.157297
KY21.Chr1.641	KH.C1.817		0.4334	0.4178		166.226	187.276	149.892	217.85	166.226	187.276	149.892	217.85	38.2012	88.1329	73.457	88.1329
KY21.Chr1.642	SPKH.C1.10369		0.1606	0.3886		1	1	1	1	0.16339	0.0569091	0.319751	0.0838099	0.0257576	0.160379	0.0522358	0.160379
KY21.Chr1.643	SPKH.C1.10297		#NUM!	#NUM!		1	1	1	1	0	0	0.406182	0.236587	0.109067	0	0	0
KY21.Chr1.644	KH.C1.732		1.2549	1.3056		1	1	1	1	0.309915	0.240686	0.204898	0.300753	0.277295	0.220959	0.287868	0.220959
KY21.Chr1.645	KH.C1.1269		#NUM!	#NUM!	DUOXA1: dual oxidase maturation factor 1	1	1	1	1	0.0153397	0	0	0.0262281	0	0	0.0122603	0
KY21.Chr1.646	SPKH.C1.10246		0.2141	#NUM!		1	1	1	1	0.0614481	0.160519	0.120253	0.157597	0.048435	0.226184	0	0.226184
KY21.Chr1.647	KH.C1.1135		0.7297	1.1127	ANAPC4: anaphase promoting complex subunit 4	1	1	1	1	0.830376	0.78503	0.766086	0.887368	0.546995	0.749576	0.67316	0.749576
KY21.Chr1.648	SPKH.C1.10446		0	0	WSCD2: WSC domain containing 2	1	1	1	1	0.398854	0.115768	0.130092	0.227322	0	0.326253	0	0.326253
KY21.Chr1.649	KH.C1.1049		0.2569	0.3379	CLDN19: claudin 19	1	1	1	1	0.167065	0.0941297	0.134624	0.117621	0.0619696	0.241157	0.0628363	0.241157
KY21.Chr1.65	KH.C1.1225		11.5635	#NUM!		1	1	1	1	0.262701	0.424818	0.367215	0.224585	0.26623	0.0230232	0.179969	0.0230232
KY21.Chr1.650	KH.C1.282		0.7498	0.5225	INTU: inturned planar cell polarity protein	4.57718	3.9127	4.56066	3.38814	4.57718	3.9127	4.56066	3.38814	3.91584	5.22223	2.85527	5.22223
KY21.Chr1.651	KH.C1.625		0.3854	1.0688	HMCN1: hemicentin 1	1	1	1	1	0.084951	0.102422	0.134277	0.0446925	0.0309049	0.0801784	0.0574515	0.0801784
KY21.Chr1.652	KH.S1827.1		#NUM!	#NUM!	HMCN1: hemicentin 1	1	1	1	1	0	0	0	0	0	0	0	0
KY21.Chr1.653	KH.S1827.1		#NUM!	#NUM!	HMCN1: hemicentin 1	1	1	1	1	0	0.0348817	0	0	0	0	0	0
KY21.Chr1.654	KH.C1.625		0.7476	0.702	TUBGCP6: tubulin gamma complex associated protein 6	1.18448	1.05885	1	1	1.18448	1.05885	0.832897	0.935616	0.706441	0.944931	0.543541	0.944931
KY21.Chr1.655	KH.C1.680		0.5147	0.7141	CCDC124: coiled-coil domain containing 124	19.3279	21.5449	17.9555	21.1527	19.3279	21.5449	17.9555	21.1527	7.88414	15.3176	12.5025	15.3176
KY21.Chr1.656	KH.C1.141		1.7411	1.72	TMEM68: transmembrane protein 68	6.16081	7.93704	2.96127	5.28232	6.16081	7.93704	2.96127	5.28232	4.11775	2.36498	3.77221	2.36498
KY21.Chr1.657	KH.C1.557		1.1172	1.1234	RNF213: ring finger protein 213	1	1	1	1	0.370967	0.296103	0.74459	0.341538	0.487343	0.436198	0.351613	0.436198
KY21.Chr1.658	KH.C1.1024		0.388	0.3768	GRWD1: glutamate rich WD repeat containing 1	47.9833	41.6765	40.3876	48.3576	47.9833	41.6765	40.3876	48.3576	23.9125	61.6173	19.0305	61.6173
KY21.Chr1.659	KH.C1.1118		1.1745	0.9983	EFHD2: EF-hand domain family member D2	30.497	22.3975	25.6503	31.1224	30.497	22.3975	25.6503	31.1224	34.0886	29.023	38.3229	29.023
KY21.Chr1.66	KH.S1223.1		1.5542	1.7968	KLHL3: kelch like family member 3	2.12185	2.11601	2.30768	2.09589	2.12185	2.11601	2.30768	2.09589	4.10779	2.64301	2.88187	2.64301
KY21.Chr1.660	KH.C1.1171		0.2164	0.2977	EFHD2: EF-hand domain family member D2	37.4049	34.6107	61.8193	67.3177	37.4049	34.6107	61.8193	67.3177	6.20011	28.6455	17.8907	28.6455
KY21.Chr1.661	KH.C1.167		0.7091	0.6137	MIEN1: migration and invasion enhancer 1	29.9867	38.8994	25.2293	32.6605	29.9867	38.8994	25.2293	32.6605	15.6335	22.0466	23.363	22.0466
KY21.Chr1.662	KH.C1.198		1.1842	1.2003	RERE: arginine-glutamic acid dipeptide repeats	2.10196	1.99316	1.77351	2.18912	2.10196	1.99316	1.77351	2.18912	3.2645	2.75661	2.85812	2.75661
KY21.Chr1.663	KH.C1.696		0.1713	0.1439		1.89089	3.74205	1	1	1.89089	3.74205	0.504605	0.587831	0.270991	1.58186	0.549562	1.58186
KY21.Chr1.664	KH.C1.429		0.1028	0.068	GPC5: glypican 5	12.3001	11.9679	11.9394	12.1616	12.3001	11.9679	11.9394	12.1616	2.7413	26.6516	1.71176	26.6516
KY21.Chr1.665	0		#NUM!	#NUM!		1	1	1	1	0	0	0	0	0	0	0	0
KY21.Chr1.666	KH.C1.95		1.2848	0		1	1	1	1	0	0.117744	0.132312	0	0.0532923	0.0414778	0	0.0414778
KY21.Chr1.667	KH.C1.658		14.7756	26.2348	TRAF4: TNF receptor associated factor 4	1	1	1	1	0.0672754	0.0781073	0.197485	0.0383428	0.8131	0.0550297	0.96786	0.0550297
KY21.Chr1.668	KH.C1.450		1.4989	0.9716		1	1	1	1	0.656807	0.549922	0.667399	0.971843	0.836305	0.557916	1.13067	0.557916
KY21.Chr1.669	KH.C1.492		1.8778	1.4979		1	1	1	1.07914	0.582596	0.450932	0.791757	1.07914	0.969459	0.516262	0.95715	0.516262
KY21.Chr1.67	KH.C1.582		#NUM!	#NUM!	RPTN: repetin	1	1	1	1	0	0	0.0803012	0.0233864	0.862491	0	0.240503	0
KY21.Chr1.670	KH.C1.730		1.3319	1.4418	VPS13C: vacuolar protein sorting 13 homolog C	1	1	1	1	0.334174	0.28639	0.361406	0.350343	0.431152	0.3237	0.387982	0.3237
KY21.Chr1.671	KH.C1.919		#NUM!	#NUM!		1	1	1	1	0	0	0	0	0	0	0	0
KY21.Chr1.672	KH.C1.598		0.4172	0.5281	ACVR2B: activin A receptor type 2B	8.83159	8.15595	6.61978	8.9042	8.83159	8.15595	6.61978	8.9042	6.99436	16.7624	6.90776	16.7624
KY21.Chr1.673	KH.C1.691		0	0.6477		1	1	1	1	0.834988	0.727071	0.722756	0.576561	0	0.334933	0.0513358	0.334933
KY21.Chr1.674	KH.C1.736		0.2654	0.3091	CDCA7L: cell division cycle associated 7 like	35.3728	32.8346	26.0094	32.5305	35.3728	32.8346	26.0094	32.5305	12.1814	45.8873	14.9868	45.8873
KY21.Chr1.675	KH.C1.373		1.0362	1.1552		5.15671	6.17184	5.30714	6.83231	5.15671	6.17184	5.30714	6.83231	7.96737	7.68831	10.9524	7.68831
KY21.Chr1.676	KH.C1.190		0.6669	0.8796	ATG3: autophagy related 3	10.5332	10.3492	5.1213	10.6455	10.5332	10.3492	5.1213	10.6455	6.77265	10.1544	8.66267	10.1544
KY21.Chr1.677	KH.C1.186		1.4145	1.5857	C1orf50: chromosome 1 open reading frame 50	1.74941	2.34355	2.29115	2.34691	1.74941	2.34355	2.29115	2.34691	4.85808	3.43434	4.38825	3.43434
KY21.Chr1.678	KH.C1.1033		0.5484	0.4608	ADHFE1: alcohol dehydrogenase, iron containing 1	11.9948	12.7721	9.58289	12.2324	11.9948	12.7721	9.58289	12.2324	6.24998	11.3962	5.79881	11.3962
KY21.Chr1.679	KH.C1.387		0.6703	0.7898	ATMIN: ATM interactor	8.93062	7.51544	8.21071	10.1456	8.93062	7.51544	8.21071	10.1456	5.66928	8.45717	6.65877	8.45717
KY21.Chr1.68	SPKH.C1.10195		0	3.8866		1	1	1	1	0	0.0449371	0.100994	0	0	0.06332	0.164988	0.06332
KY21.Chr1.680	KH.C1.737		0.5291	0.4801	PSMB6: proteasome subunit beta 6	31.9856	30.1099	19.8939	29.1512	31.9856	30.1099	19.8939	29.1512	15.6218	29.5222	13.0509	29.5222
KY21.Chr1.681	KH.C1.1010		0.5888	0.741	ITLN2: intelectin 2	1.31233	1.08039	1.51757	1.63188	1.31233	1.08039	1.51757	1.63188	1.03441	1.75656	0.858174	1.75656
KY21.Chr1.682	KH.L164.3		0	#NUM!		1	1	1	1	0	0	0	0	0	0.19152	0.249514	0.19152
KY21.Chr1.683	KH.C1.374		0.9056	0.865	WAS: Wiskott-Aldrich syndrome	1	1	3.13992	1	0.8381	0.854698	3.13992	0.955331	1.71997	1.89915	1.76214	1.89915
KY21.Chr1.684	KH.C1.818		0.4348	0.4416	LRRC74B: leucine rich repeat containing 74B	1.58473	1.48137	1.64185	1.17548	1.58473	1.48137	1.64185	1.17548	0.808255	1.85862	1.21071	1.85862
KY21.Chr1.685	SPKH.C1.10009		0	#NUM!	SLC6A1: solute carrier family 6 member 1	1	1	1	1	0	0	0	0	0	0.0135844	0	0.0135844
KY21.Chr1.686	SPKH.C1.10009		#NUM!	#NUM!		1	1	1	1	0	0	0	0	0	0	0	0
KY21.Chr1.687	KH.C1.313		0	#NUM!		1	1	1	1	0	0	0.0885863	0.0386989	0	0.083311	0	0.083311
KY21.Chr1.688	KH.C1.313		0.0513	0.2649		1	1	1	1	0.084348	0.22034	0.165068	0.252384	0.0166213	0.323412	0.0505614	0.323412
KY21.Chr1.689	KH.C1.304		0.1284	0.0607		1	1	1	1	0	0	0.0414323	0	0.0333759	0.259767	0.0338428	0.259767
KY21.Chr1.69	KH.C1.582		17.9877	2.9149		1	1	1	1	0.059007	0.154142	0.115476	0.0504455	1.3023	0.0723994	0.282968	0.0723994
KY21.Chr1.690	0		#NUM!	#NUM!		1	1	1	1	0	0	0	0	0	0	0.0201157	0
KY21.Chr1.691	KH.L26.2		1.138	0.6345	LRRC29: leucine rich repeat containing 29	1	1	1	1	0.425259	0.542528	0.251603	0.355102	0.483312	0.424703	0.25294	0.424703
KY21.Chr1.692	KH.S432.2		0.2409	0.694	RIPK1: receptor interacting serine/threonine kinase 1	1	1	1	1	0.245596	0.201275	0.155497	0.222313	0.0341621	0.141806	0.0577333	0.141806
KY21.Chr1.693	KH.C1.440		0.0988	0.1388		2.43744	3.32512	4.84953	6.32082	2.43744	3.32512	4.84953	6.32082	0.320209	3.23987	0.324688	3.23987
KY21.Chr1.694	KH.S432.4		0.584	0.6151	PIGL: phosphatidylinositol glycan anchor biosynthesis class L	12.7091	18.8041	17.8954	21.1119	12.7091	18.8041	17.8954	21.1119	11.8095	20.221	12.9656	20.221
KY21.Chr1.695	KH.S432.5		0.8414	0.6947	TSC1: tuberous sclerosis 1	2.11049	1.89362	1.84524	2.09241	2.11049	1.89362	1.84524	2.09241	1.64457	1.95443	1.83433	1.95443
KY21.Chr1.696	SPKH.C1.10013		0.052	0.0406	FBLN2: fibulin 2	35.2831	32.5169	29.7619	29.3724	35.2831	32.5169	29.7619	29.3724	2.43984	46.8813	1.75007	46.8813
KY21.Chr1.697	KH.C1.717		0.6935	0.5673	TMEM67: transmembrane protein 67	1	1	1.13219	1	0.824587	0.880146	1.13219	0.864126	0.639477	0.921987	0.499604	0.921987
KY21.Chr1.698	0		2.5696	#NUM!		1	1	1	1	0	0	0	0	0.090878	0.0353655	0	0.0353655
KY21.Chr1.699	KH.C1.88		0.7048	0.5226	ANK3: ankyrin 3	8.56376	6.82833	13.9309	9.66833	8.56376	6.82833	13.9309	9.66833	13.0456	18.509	7.79911	18.509
KY21.Chr1.7	KH.L60.3		0.5347	0.4567	FBXO21: F-box protein 21	10.9466	11.5144	10.3255	13.2888	10.9466	11.5144	10.3255	13.2888	5.14252	9.61665	5.49442	9.61665
KY21.Chr1.70	0		74.5207	2.2672		1	1	1	1	0	0.0236498	0.159455	0	2.48336	0.0333244	0.75977	0.0333244
KY21.Chr1.700	KH.C1.943		#NUM!	#NUM!		1	1	5.1223	1	0	0	5.1223	0	21.1834	0	14.1092	0
KY21.Chr1.701	KH.C1.157	TaGdown	1.4454	0.6548		3.89325	1.69504	4.44443	1.10946	3.89325	1.69504	4.44443	1.10946	11.5079	7.96146	8.03852	7.96146
KY21.Chr1.702	KH.C1.649		0.2735	0.3306	RNASEH2C: ribonuclease H2 subunit C	41.5143	46.1535	31.8183	44.8501	41.5143	46.1535	31.8183	44.8501	7.60396	27.7957	14.2078	27.7957
KY21.Chr1.703	KH.C1.998		0.8455	0.7384	DEPTOR: DEP domain containing MTOR interacting protein	4.37714	3.91443	3.07281	3.90754	4.37714	3.91443	3.07281	3.90754	2.59399	3.06797	3.10303	3.06797
KY21.Chr1.704	KH.C1.1185		0.3212	0.2125		1	1	1	1	0.63018	0.675363	0.569193	0.994607	0.343886	1.0706	0.271208	1.0706
KY21.Chr1.705	KH.C1.14		1.0314	1.3523	ARF6: ADP ribosylation factor 6	20.6439	20.7578	16.9775	20.0018	20.6439	20.7578	16.9775	20.0018	15.7684	15.2881	22.746	15.2881
KY21.Chr1.706	KH.C1.1299		3.2822	2.4492	HDLBP: high density lipoprotein binding protein	19.5985	17.0131	22.1474	19.6369	19.5985	17.0131	22.1474	19.6369	102.009	31.0792	63.289	31.0792
KY21.Chr1.707	KH.C1.463		0.7231	0.6328	PASK: PAS domain containing serine/threonine kinase	4.66347	4.18739	4.39416	4.25107	4.66347	4.18739	4.39416	4.25107	4.94415	6.83729	4.11236	6.83729
KY21.Chr1.708	KH.C1.8		0	0	CLDN19: claudin 19	2.78394	2.47721	1.76964	2.50161	2.78394	2.47721	1.76964	2.50161	0	7.55463	0	7.55463
KY21.Chr1.709	KH.C1.802		0.4996	0.6477	COL14A1: collagen type XIV alpha 1 chain	1	1	1	1	0.514081	0.486564	0.699859	0.458599	0.246651	0.493637	0.321558	0.493637
KY21.Chr1.71	KH.C1.1300		1.4452	1.2264	MAK: male germ cell associated kinase	2.20581	2.39581	2.76088	2.47215	2.20581	2.39581	2.76088	2.47215	5.25903	3.63888	3.53845	3.63888
KY21.Chr1.710	KH.C1.617		0.6123	0.8114	BRCC3: BRCA1/BRCA2-containing complex subunit 3	2.12392	1.81485	1.37902	1.83272	2.12392	1.81485	1.37902	1.83272	1.75236	2.8617	2.49079	2.8617
KY21.Chr1.711	SPKH.S1471.10001		1.4683	0.1943		1	1	1	1	0	0.137271	0.385637	0.134772	0.16568	0.112831	0.0209997	0.112831
KY21.Chr1.712	KH.L56.6		#NUM!	#NUM!		1	1	1	1	0	0	0	0	0	0	0	0
KY21.Chr1.713	0		#NUM!	#NUM!	C1QTNF9B: C1q and TNF related 9B	1	1	1	1	0.218028	0	0	0	0	0	0	0
KY21.Chr1.714	0		#NUM!	#NUM!		1	1	1	1	0	0	0	0	0	0	0	0
KY21.Chr1.715	KH.C1.145		0.458	0.3897	DKC1: dyskerin pseudouridine synthase 1	92.0712	92.771	86.7451	102.582	92.0712	92.771	86.7451	102.582	63.006	137.556	58.4578	137.556
KY21.Chr1.716	KH.C1.382		1.0422	0.9974	CAB39: calcium binding protein 39	4.48574	4.39543	3.81768	4.52272	4.48574	4.39543	3.81768	4.52272	4.66514	4.4761	4.43089	4.4761
KY21.Chr1.717	KH.C1.77		0.4556	0.6456	OTUD4: OTU deubiquitinase 4	1	1.01353	1	1	0.901134	1.01353	0.578649	0.312969	0.451335	0.990486	0.757744	0.990486
KY21.Chr1.718	KH.C1.527		#NUM!	#NUM!		1	1	1	1	0	0	0.377601	0.274924	0	0	0	0
KY21.Chr1.719	KH.C1.276		0.4017	0.5232	C12orf66: chromosome 12 open reading frame 66	4.88038	5.6506	6.45468	6.76275	4.88038	5.6506	6.45468	6.76275	2.13479	5.31358	3.6006	5.31358
KY21.Chr1.72	KH.C1.593		0.9825	0.6827	CACHD1: cache domain containing 1	1	1	1	1	0.326993	0.307209	0.2947	0.338401	0.529054	0.538464	0.357636	0.538464
KY21.Chr1.720	KH.C1.994		0.5864	0.5014	SNRNP70: small nuclear ribonucleoprotein U1 subunit 70	49.3615	43.0644	40.7048	42.8971	49.3615	43.0644	40.7048	42.8971	27.5991	47.0593	26.5745	47.0593
KY21.Chr1.721	KH.C1.91		#NUM!	#NUM!		1	1	1	1	0	0	0	0	0	0	0	0
KY21.Chr1.722	KH.C1.91		#NUM!	#NUM!		1	1	1	1	0	0	0	0	0	0	0	0
KY21.Chr1.723	KH.C1.1124		0.2791	0.2671	SLC6A14: solute carrier family 6 member 14	14.1032	11.2474	10.7916	11.6865	14.1032	11.2474	10.7916	11.6865	3.65943	13.1079	3.7436	13.1079
KY21.Chr1.724	KH.C1.91		#NUM!	#NUM!		1	1	1	1	0	0	0	0	0	0	0	0
KY21.Chr1.725	KH.C1.870		1.408	1.3345	SLC6A14: solute carrier family 6 member 14	158.351	122.64	85.7622	107.341	158.351	122.64	85.7622	107.341	146.95	104.368	148.427	104.368
KY21.Chr1.726	KH.C1.591		1.357	1.0982	SLC6A14: solute carrier family 6 member 14	107.284	83.3175	87.0066	96.1512	107.284	83.3175	87.0066	96.1512	65.0173	47.9124	52.1835	47.9124
KY21.Chr1.727	KH.C1.471		0.6452	0.6413	NCAPD2: non-SMC condensin I complex subunit D2	4.25397	3.56063	2.87731	3.85041	4.25397	3.56063	2.87731	3.85041	3.79318	5.87842	4.49649	5.87842
KY21.Chr1.728	KH.C1.278		2.1128	2.0554	DNAH2: dynein axonemal heavy chain 2	1	1	1	1	0.0793177	0.050891	0.11029	0.0713782	0.12175	0.0576237	0.0917556	0.0576237
KY21.Chr1.729	KH.C1.1115		2.3555	0.1214		1	1	1	1	0.381513	0.609041	0.311089	0.380517	0.551317	0.234051	0.0508207	0.234051
KY21.Chr1.73	KH.C1.1197		0.4764	0.4888	PGS1: phosphatidylglycerophosphate synthase 1	15.852	15.885	14.138	19.4616	15.852	15.885	14.138	19.4616	8.64407	18.1426	10.0112	18.1426
KY21.Chr1.730	KH.C1.440		0.0786	0.0462		1	1.09544	3.46212	6.99077	0.786271	1.09544	3.46212	6.99077	0.371856	4.72716	0.125686	4.72716
KY21.Chr1.731	SPKH.S115.10007		0.7246	0.6139		14.3037	17.4717	9.23352	9.25619	14.3037	17.4717	9.23352	9.25619	11.0397	15.2345	11.0353	15.2345
KY21.Chr1.541	KH.C1.995	TaGup	2.3742	1.6649	CARS: cysteinyl-tRNA synthetase	1.84347	3.51529	1.46123	3.8056	1.84347	3.51529	1.46123	3.8056	4.99564	2.10407	3.82626	2.10407
KY21.Chr1.733	KH.C1.648		0.4282	0.3238		1	1	1	1.46318	0.927069	0.434673	0.697791	1.46318	0.393475	0.918734	0.56997	0.918734
KY21.Chr1.734	KH.C1.431		0.7586	1.7239		11.4581	12.102	8.82402	12.0632	11.4581	12.102	8.82402	12.0632	9.28249	12.2363	13.9913	12.2363
KY21.Chr1.735	KH.C1.1131		0.4183	0.9109	CATIP: ciliogenesis associated TTC17 interacting protein	1.78969	1.67826	1.68385	1.53002	1.78969	1.67826	1.68385	1.53002	0.759598	1.81583	0.825239	1.81583
KY21.Chr1.1704	KH.C1.294	TaGup	2.0778	1.9914		11.1327	19.3435	7.28705	15.3844	11.1327	19.3435	7.28705	15.3844	32.7564	15.7645	32.7676	15.7645
KY21.Chr1.737	KH.C1.392		0	0		2.5993	3.15253	3.17924	2.1428	2.5993	3.15253	3.17924	2.1428	0	3.47401	0	3.47401
KY21.Chr1.738	KH.C1.1249		0.3805	0.3875	SELENOI: selenoprotein I	4.21128	4.33682	4.08243	4.30247	4.21128	4.33682	4.08243	4.30247	2.62061	6.88679	2.19876	6.88679
KY21.Chr1.739	KH.C1.502		0.7247	0.6015	CSMD3: CUB and Sushi multiple domains 3	1	1	1	1	0.743182	0.598473	0.861154	0.668791	0.242246	0.334233	0.174177	0.334233
KY21.Chr1.74	KH.C1.301		0.8773	0.8428	HOMER2: homer scaffolding protein 2	3.47291	3.47582	2.40361	3.28583	3.47291	3.47582	2.40361	3.28583	3.75563	4.28062	3.76585	4.28062
KY21.Chr1.740	KH.C1.607		#NUM!	#NUM!		1	1	1	1	0	0.281545	0	0.13821	0	0	0	0
KY21.Chr1.741	KH.C1.134		#NUM!	0		1	1	1	1	0	0	0.151245	0	0	0	0	0
KY21.Chr1.742	KH.C1.767		0.4338	0.2619	TGS1: trimethylguanosine synthase 1	1.68316	1.8009	1.96989	1.928	1.68316	1.8009	1.96989	1.928	0.893147	2.05843	0.545142	2.05843
KY21.Chr1.743	KH.C1.908		0.3861	0.5665		17.7475	19.4621	17.1487	19.3449	17.7475	19.4621	17.1487	19.3449	9.61748	24.9058	9.79633	24.9058
KY21.Chr1.744	KH.C1.348		0.295	0.2591		13.2852	14.2637	11.9898	14.3349	13.2852	14.2637	11.9898	14.3349	3.15169	10.6824	3.29887	10.6824
KY21.Chr1.745	KH.C1.905		1.1624	1.3603	DNAH10: dynein axonemal heavy chain 10	1	1	1	1	0.166048	0.116473	0.205352	0.11041	0.207232	0.178268	0.129028	0.178268
KY21.Chr1.746	KH.C1.1108		0	#NUM!	NAT1: N-acetyltransferase 1	1	1	1	1	0	0	0	0	0	0.123033	0	0.123033
KY21.Chr1.747	KH.C1.466		0.9333	0.8738	RIDA: reactive intermediate imine deaminase A homolog	8.36785	9.81805	6.45315	8.06311	8.36785	9.81805	6.45315	8.06311	6.45602	6.91721	8.10497	6.91721
KY21.Chr1.748	KH.C1.104		0.4162	0.4531	NDUFAF5: NADH:ubiquinone oxidoreductase complex assembly factor 5	20.8505	21.6697	17.477	18.2086	20.8505	21.6697	17.477	18.2086	9.54284	22.9236	13.2601	22.9236
KY21.Chr1.749	KH.S1352.1		#NUM!	#NUM!		1	1	1	1	0	0	0	0	0	0	0	0
KY21.Chr1.75	KH.C1.329		0.3236	0.2969	RAN: RAN, member RAS oncogene family	295.666	319.732	217.788	277.872	295.666	319.732	217.788	277.872	82.0618	253.582	81.019	253.582
KY21.Chr1.750	SPKH.S2113.10001		3.1203	0.9485		1	1	1	1	0.793349	0	0.360418	0	1.13901	0.365029	0.928482	0.365029
KY21.Chr1.751	KH.C1.564		0.9139	1.1525	TRAPPC9: trafficking protein particle complex 9	1.73091	1.22841	1.70347	1.916	1.73091	1.22841	1.70347	1.916	1.63249	1.78618	1.78327	1.78618
KY21.Chr1.752	KH.C1.514		1.0759	1.2541	ARHGAP39: Rho GTPase activating protein 39	15.7685	13.1768	15.4111	17.7503	15.7685	13.1768	15.4111	17.7503	14.1985	13.1967	17.5217	13.1967
KY21.Chr1.753	KH.C1.168		0.3769	0.5365		77.7323	75.548	70.938	93.8438	77.7323	75.548	70.938	93.8438	27.0288	71.7115	48.7485	71.7115
[truncated: 16,790 more rows]

## Sheet: Table 2
Supplementary file 2. List of candidate genes upregulated by GABA
KY21 gene model	Human homolog	1GABA vs Control Sample 1	1GABA vs Control Sample 2	2Papillae vs Trunk Sample 3	2Papillae vs Trunk Sample 4
KY21.Chr1.1223		2.33	1.97	Not determined	Not determined
KY21.Chr2.1293		2.07	3.09	Not determined	Not determined
KY21.Chr2.219		1.78	1.8	Not determined	Not determined
KY21.Chr2.1069	ASNS: asparagine synthetase (glutamine-hydrolyzing)	6.37	11.6	22.05	49.41
KY21.Chr5.240	Serine peptidase inhibitor Kunitz type 3	1.79	2.11	12.57	14.39
KY21.Chr8.1171		1.56	1.52	11.08	10.04
KY21.Chr3.438		2.38	1.91	8.61	9.16
KY21.Chr11.358		3.57	3.39	4.69	1.2
KY21.Chr9.130	CTH: cystathionine gamma-lyase	2.16	2.75	4.68	3.26
KY21.Chr9.1057	ASS1: argininosuccinate synthase 1	3.69	6.23	4.5	3.31
KY21.Chr3.1611		1.69	1.54	4.48	7.14
KY21.Chr1.732		2.34	1.66	4.37	2.74
KY21.Chr8.489	AIFM2: apoptosis-inducing factor, mitochondria-associated 2	1.85	2.05	4.01	1.77
KY21.Chr7.224	B4GALT1: beta-1,4-galactosyltransferase 1	2.43	1.51	3.99	4.16
1 The RPKM in the GABA-treated sample was divided by the RPKM in the solvent (seawater)-treated sample to calculate the scores.
2 The RPKM in the papilla region was divided by the RPKM in the remaining trunk region to calculate the scores.
